# Supplementary material
Source: publisher figshare collection journal article supplement (https://acs.figshare.com/ndownloader/files/24578958)
Supplement: Supplementary file 1 [file 24578958]

# Remarkable Structural Diversity between Zr/Hf and Rare-Earth MOFs via Ligand Functionalization and the Discovery of Unique (4, 8)-c and (4, 12)-connected Frameworks

Giasemi K. Angeli<sup>§</sup>, Danai Batzavali<sup>§</sup>, Katerina Mavronasou<sup>§</sup>, Constantinos Tsangarakis<sup>§</sup>, Tobias Stuerzer<sup>‡</sup>, Holger Ott<sup>‡</sup> and Pantelis N. Trikalitis<sup>§,\*</sup>

<sup>§</sup>Department of Chemistry, University of Crete, Voutes 71003 Heraklion, Greece; <sup>‡</sup>Bruker AXS GmbH, Ostliche Rheinbrückenstr 49, D-76187 Karlsruhe, Germany

## SUPPORTING INFORMATION

### Table of Contents

|                                                                   |     |
|-------------------------------------------------------------------|-----|
| Methods and instrumentation .....                                 | S2  |
| Organic synthesis and <sup>1</sup> H NMR spectra .....            | S3  |
| MOF synthesis .....                                               | S8  |
| Single crystal X-ray crystallography and structural figures ..... | S10 |
| Powder X-ray diffraction measurements .....                       | S21 |
| Energy dispersive spectroscopy (EDS) .....                        | S27 |
| Gas sorption measurements and analysis .....                      | S28 |
| NMR measurements of acid digested samples .....                   | S52 |
| Thermal gravimetric analyses (TGA) .....                          | S53 |
| Infrared spectroscopy (IR) .....                                  | S54 |
| References .....                                                  | S55 |

## Methods and Instrumentation

**Starting Materials** All chemicals were purchased commercially and were used without further purification. Hydrochloric acid 37%, Pd(PPh<sub>3</sub>)<sub>4</sub>, Acetone 99.5%, dichloromethane CH<sub>2</sub>Cl<sub>2</sub>, > 99.9%, c.H<sub>2</sub>SO<sub>4</sub>, chlorosulfonic acid 99%. Tetrahydrofuran (THF) >99.9%, methanol (MeOH) >99.8%, Ethanol absolute (EtOH) and H<sub>3</sub>PO<sub>2</sub> 50% in H<sub>2</sub>O were purchased from Aldrich. N,N-Dimethylformamide 99.8%, ZrCl<sub>4</sub>, HfCl<sub>4</sub>, chlorotriphenyl methane 98%, isopentyl nitrite 97%, . Y(NO<sub>3</sub>)<sub>3</sub>.6H<sub>2</sub>O 99.9%, Er(NO<sub>3</sub>)<sub>3</sub>.5H<sub>2</sub>O 99.9% Ho(NO<sub>3</sub>)<sub>3</sub>.5H<sub>2</sub>O 99.9%, Yb(NO<sub>3</sub>)<sub>3</sub>.5H<sub>2</sub>O 99.9% and boronic acid were purchased from Alfa Aesar. Benzoic acid (reagent grade) was purchased from Riedel De Haen.

**Powder X-Ray Diffraction Patterns** were collected using a Panalytical X'pert Pro MPD System Cu K $\alpha$  ( $\lambda$  = 1.5418 Å) radiation operated at 45 kV and 40 mA. A typical scan rate was 1.2 sec/step with a step size of 0.02 deg.

## Single Crystal X-ray Diffraction

Single crystal X-ray diffraction data were collected on a Bruker D8 Venture diffractometer equipped with a Cu Incoatec microfocus I $\mu$ S 3.0 source, a Photon II detector operating in shutterless mode and a cryostem 800 system (Oxford Cryosystems) for temperature regulation.

**Thermogravimetric analyses (TGA)** were performed using a Shimadzu TA-50 instrument. An amount of 11.8 mg of sample was placed inside a quartz cap and heated up to 750°C under N<sub>2</sub> flow with a heating rate of 5°C/min.

**<sup>1</sup>H NMR spectra** were recorded on a 500MHz Bruker spectrometer. MOF samples were prepared by digesting a small portion (~2mg) of the activated solids with a drop of concentrated HF or HCl acid (37%) in a DMSO-d<sub>6</sub> solution.

**Gas Sorption Measurements.** Low Pressure nitrogen, argon, carbon dioxide, methane and xenon gas sorption measurements were carried at different temperatures up to 1 bar using Autosorb-iQ2 instrument from Quantachrome equipped with a cryocooler system capable of temperature control from 20 to 320 K. In the case of M-**flu**-SO<sub>2</sub> (M: Zr, Hf), prior to analysis the as made sample was washed with N,N-dimethylformamide four times per day for 1 day and then soaked in acetone or dichloromethane 5 times per day for 6 days. Finally, the wet sample was transferred to a 6 mm sample cell and activated under dynamic vacuum at room temperature for 18 hours until the outgas rate was less than 2 mTorr/min. After evacuation the sample was weighted to obtain the precise mass of the evacuated sample and the cell was transferred to the analysis port of the gas sorption instrument. In the case of Y-**hpt**-MOF-1 and Y-**ken**-MOF-1 successful activation was achieved according to the following procedure: initially the solid was washed with fresh DMF (5 ml), three times per day for 2 days, to remove any unreacted starting materials from the pores. Then, DMF solvent was exchanged with ethanol (5 ml), four times per day for four days. After that the MOF was activated using a supercritical CO<sub>2</sub> under flow conditions, where ethanol was exchanged with liquid CO<sub>2</sub> for 24 hours using a flow of 0.5 ml per minute (20 °C and 1500 psi). Then, the sample was kept under supercritical CO<sub>2</sub> conditions (40 °C and 1500 psi) with a flow of 1 ml per minute, for 1 hour. Finally, CO<sub>2</sub> was slowly removed over a period of 5 hours using a needle valve. The activated sample was transferred in an Ar filled glove box, inserted in a 6 mm sample cell, transferred to the analysis station and evacuated under dynamic vacuum for 1 hour.

## Organic Synthesis and $^1\text{H}$ NMR spectra

The tetrahedral carboxylate ligand  $\text{H}_4\text{MTBC}$  (4', 4'', 4''', 4''''-methanetetrayltetrabiphenyl-4-carboxylic acid) was synthesized according to previous literature reports with slight modifications.<sup>1,2</sup> The precise synthetic procedure is described below (Scheme S1).

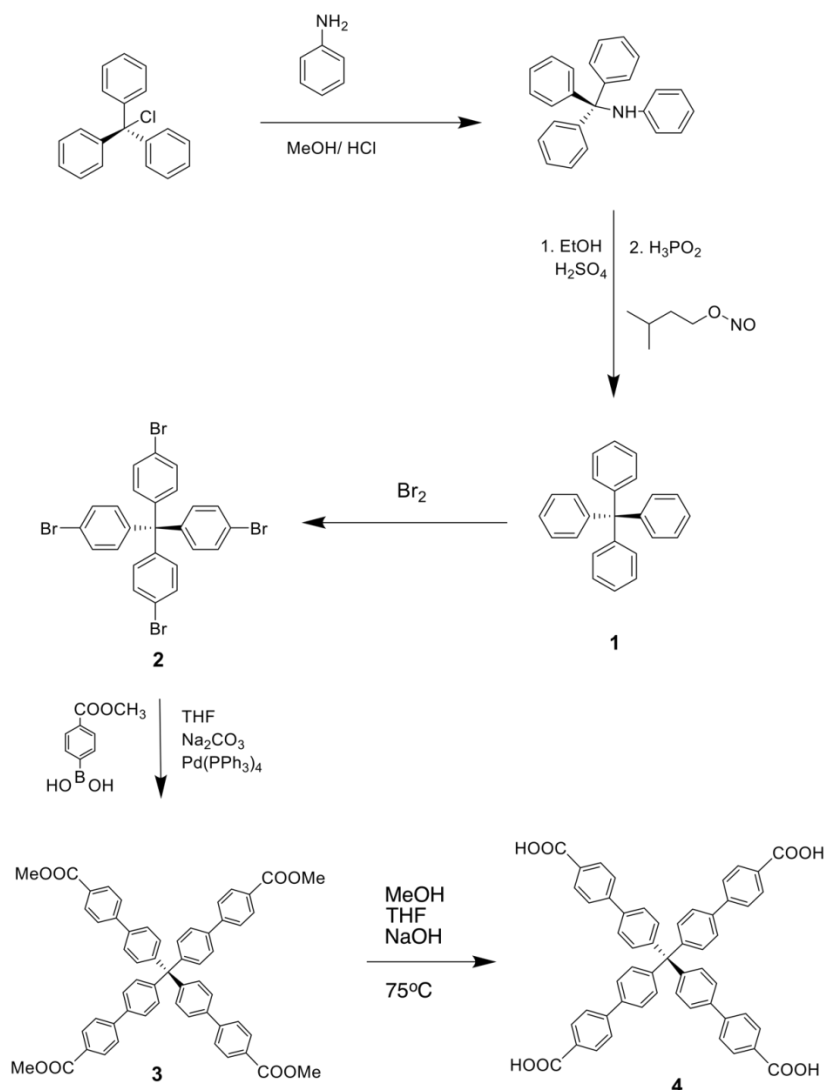

**Scheme S1.** Organic synthesis of  $\text{H}_4\text{MTBC}$  (**4**) ligand.

**Compound 1.** A 50 ml round bottom flask was loaded with 2 ml (22 mmol) aniline and 1 g (3.60 mmol) of chlorotriphenyl methane. This mixture was first heated at  $200^\circ\text{C}$  for 5 min and then cooled to  $90^\circ\text{C}$  where was held for 30 min. After that, 8 ml  $\text{HCl}$  2N and 5 ml  $\text{MeOH}$  were added in the reaction mixture and stirred under reflux for 30 min. The resulting solid was filtrated, washed with a small amount of methanol (1-3 ml) and dissolved in 10 ml  $\text{EtOH}$  and 1 ml  $\text{c.H}_2\text{SO}_4$ . The system was cooled at  $-10^\circ\text{C}$  and 0.8 ml of isopentyl nitrite were added and stirred for 30 min. Then, 1.7 ml  $\text{H}_3\text{PO}_2$  50% was added to the reaction mixture and left under reflux and stirring for 30 min. The resulting brown solid was filtrated and washed with  $\text{EtOH}$ . Yield: 1.1 g (95%),  $^1\text{H}$  NMR (500 MHz,  $\text{CDCl}_3$ ): 7.25 (m, 15H) (Figure S1).

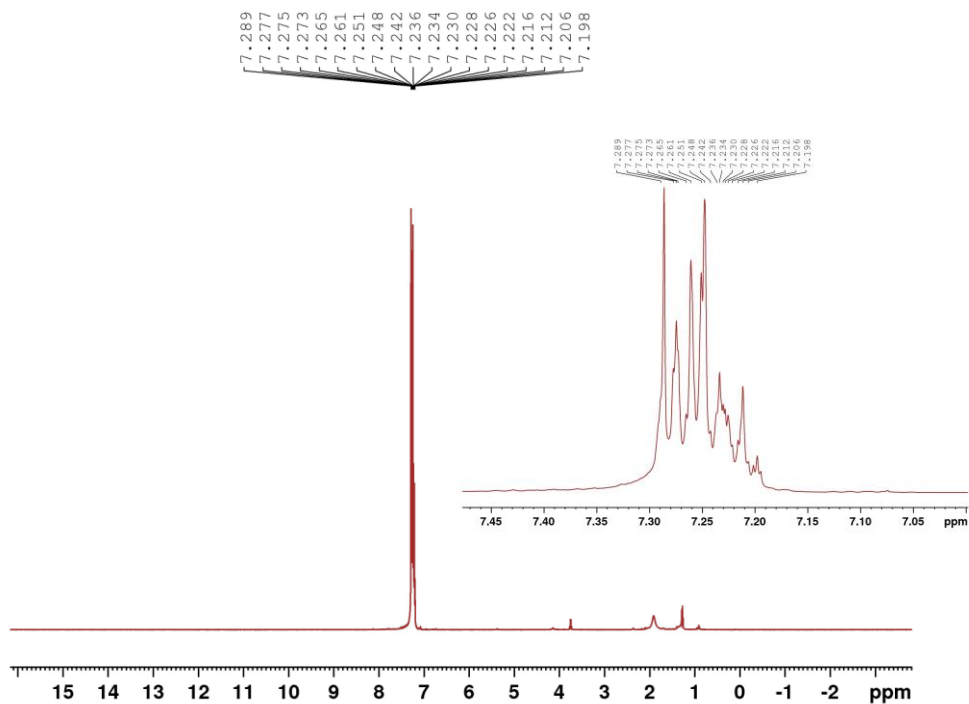

**Figure S1.**  $^1\text{H}$ NMR spectrum of compound **1** in  $\text{CDCl}_3$  (500MHz).

**Compound 2.** In a 25 ml round bottom flask compound **1** was added (1.1 g, 3.43 mmol) along with 5 ml of neat  $\text{Br}_2$ . The mixture was stirred for 60 min at room temperature. Then, chilled ethanol was added to the flask and a pale orange solid precipitates. This solid was filtrated and washed copiously with fresh ethanol. Yield: 1.58 g (72.4%)  $^1\text{H}$  NMR (500 MHz,  $\text{CDCl}_3$ ): 7.41 (d,  $J=8.5$ , 8H), 7.03 (d,  $J=8.5$ , 8H) (Figure S2).

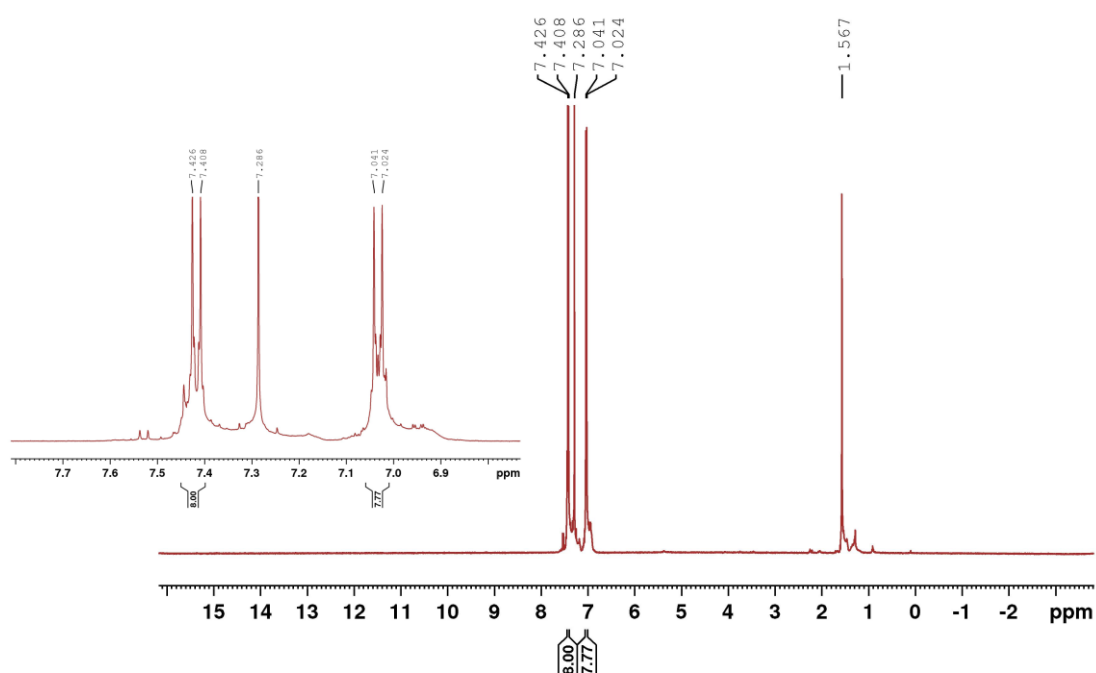

**Figure S2.**  $^1\text{H}$ NMR spectrum of compound **2** in  $\text{CDCl}_3$  (500 MHz).

**Compound 3.** In a dried under Ar double neck round bottom flask, 0.65 g of compound **2** (1 mmol) is added along with 40 ml of dry THF, 0.92 g (5.1 mmol) boronic ester, 20 ml Na<sub>2</sub>CO<sub>3</sub> 2M and 55 mg (0.047 mmol) Pd(PPh<sub>3</sub>)<sub>4</sub>. The system was sealed under Ar and refluxed for 5 days at 85 °C. After that period, the reaction mixture was extracted with THF which was then removed through rotary evaporation. The resulting solid was filtrated and washed copiously with water.

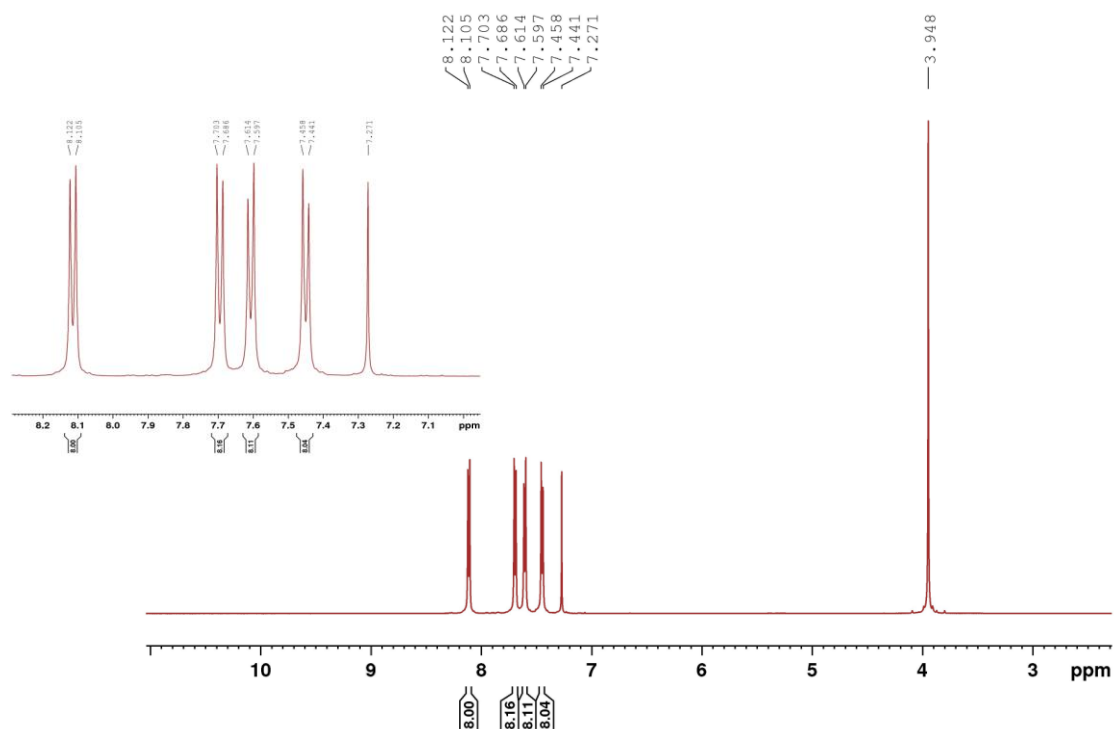

**Figure S3.** <sup>1</sup>H NMR spectrum of compound **3** in CDCl<sub>3</sub> (500MHz).

**Compound 4.** Compound **3** was added to a round bottom flask with 20 ml MeOH, 20 ml THF and 20 ml NaOH 5N. The mixture was refluxed at 85 °C overnight. After that period, 15 ml of HCl 3N were added to the reaction mixture and an off-white solid occurred. The solid was filtrated and then washed copiously with water and dried under vacuum. <sup>1</sup>H NMR (500 MHz, DMSO-d<sub>6</sub>): 12.96 (br.s 2H), 8.00 (d, J=8Hz, 8H), 7.82 (d, J=8Hz, 8H), 7.76 (d, J=8Hz, 8H), 7.41(d, J=8Hz, 8H).

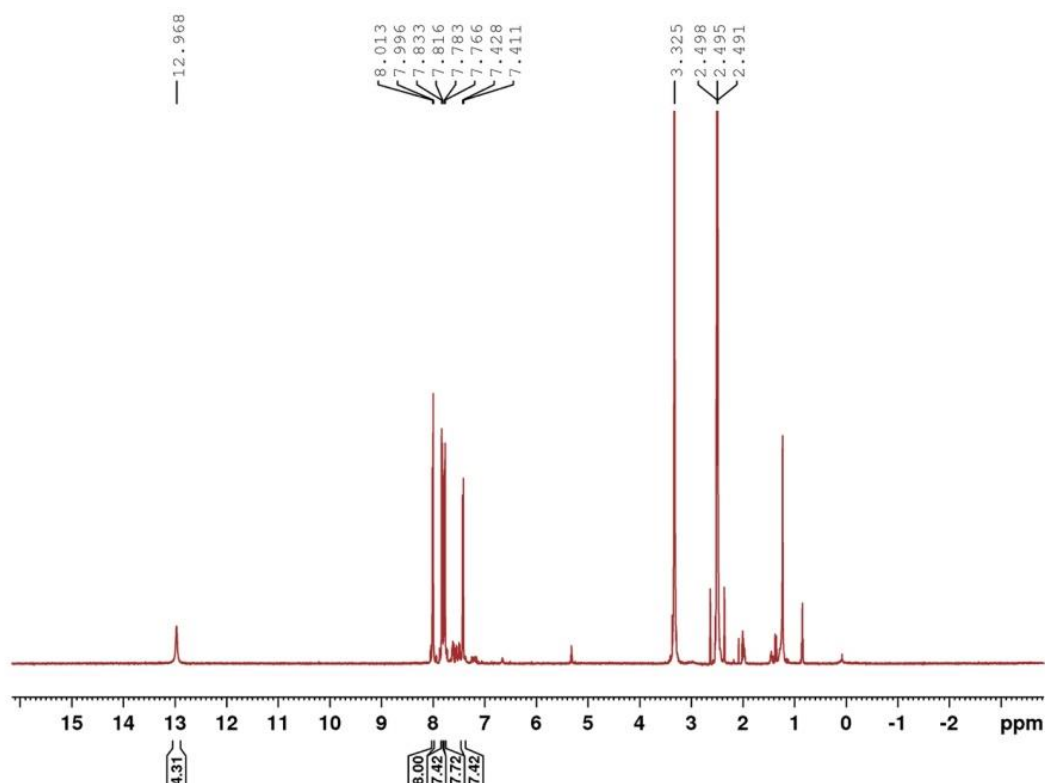

**Figure S4.**  $^1\text{H}$ NMR spectrum of compound **4** in  $\text{DMSO-d}_6$  (500MHz).

The sulfone functionalized  $\text{H}_4\text{MTBC-SO}_2$  ligand (compound **5**) was synthesized according to the following procedure (Scheme S2).

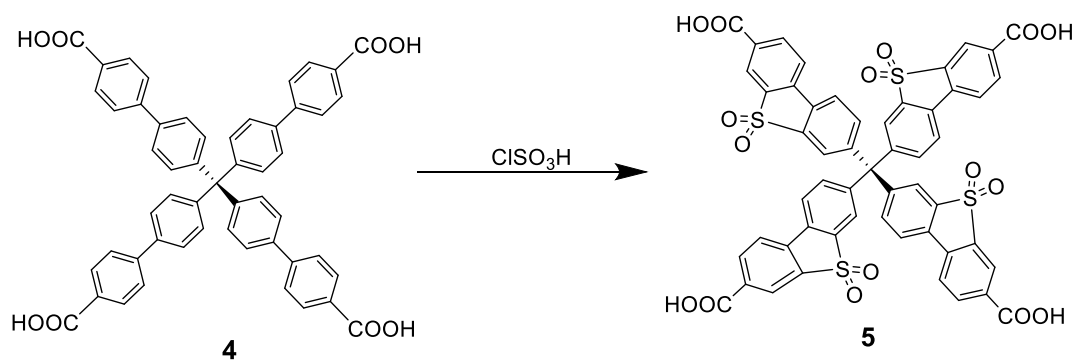

**Scheme S2.** Organic synthesis of the sulfone functionalized  $\text{H}_4\text{MTBC-SO}_2$  ( $\text{H}_4\text{L2}$ ) ligand.

**Compound 5.** A 25 ml round bottom flask was loaded with a 100 mg of compound **4**, then 5 ml  $\text{ClSO}_3\text{H}$  were added and the mixture was stirred at  $145\text{ }^\circ\text{C}$  for 60 min. After that the reaction mixture was neutralized by the addition of ice and the resulting dark red powder was washed copiously with water and dried at  $90\text{ }^\circ\text{C}$ .  $^1\text{H}$  NMR (500 MHz,  $\text{DMSO-d}_6$ ): 8.32 (m, 20H), 8 (d,  $J=8\text{Hz}$ , 4H).

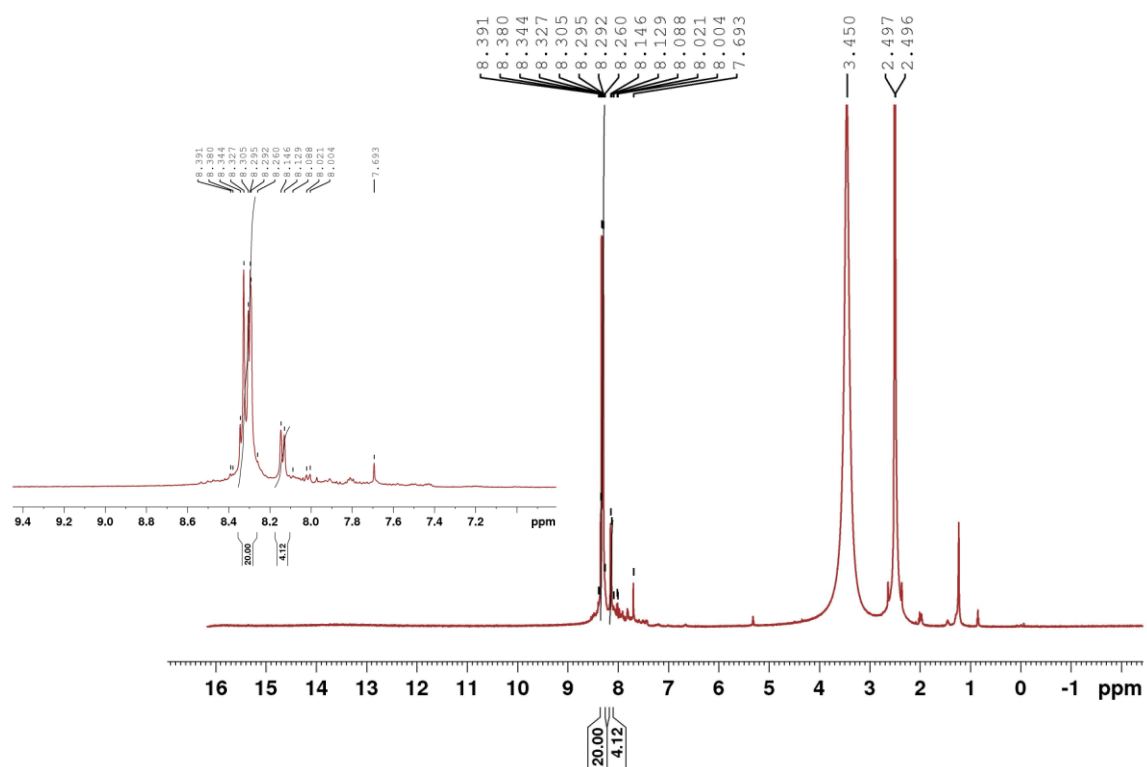

**Figure S5.** <sup>1</sup>H NMR spectrum of compound **5** in DMSO-d<sub>6</sub> (500MHz).

## MOF Synthesis

**Synthesis of Zr-flu-SO<sub>2</sub>:** A solution of 1.5 ml DMF, 450 mg benzoic acid, 0.0065 g (0.006 mmol) of H<sub>4</sub>MTBC-SO<sub>2</sub> and 8.4 mg (0.036 mmol) of ZrCl<sub>4</sub> were placed in a 20 ml glass scintillation vial. The vial was sealed and placed in an isothermal oven at 120 °C for 12h. During this period, octahedral shaped light yellow crystals were formed. (50% yield based on H<sub>4</sub>MBTC-SO<sub>2</sub>).

**Synthesis of Hf-flu-SO<sub>2</sub>:** A solution of 1.5 ml DMF, 450 mg benzoic acid, 0.0065 g (0.009 mmol) of H<sub>4</sub>MTBC-SO<sub>2</sub> and 11.5 mg (0.036 mmol) of HfCl<sub>4</sub> were placed in a 20 ml glass scintillation vial. The vial was sealed and placed in an isothermal oven at 120 °C for 12h. During this period, octahedral shaped light yellow crystals were formed. (40% yield based on H<sub>4</sub>MTBC-SO<sub>2</sub>).

**Synthesis of Y-hpt-MOF-1:** A solution of 2.5 ml DMF, 250 mg 2-fluorobenzoic acid, 1ml acetic acid, 0.0082 g (0.0075 mmol) of H<sub>4</sub>MTBC-SO<sub>2</sub> and 11.5 mg (0.03 mmol) of Y(NO)<sub>3</sub>.6H<sub>2</sub>O were placed in a 20 ml glass scintillation vial. The vial was sealed and placed in an isothermal oven at 120 °C for 3 days. During this period, rhombohedral shaped yellow crystals were formed. (40% yield based on H<sub>4</sub>MBTC-SO<sub>2</sub>).

The above optimized conditions that afforded a high-quality product in a single crystal form, resulted after the exploration of a wide range of different synthetic parameters and summarized in the following table:

**Table S1.** Synthetic conditions explored for the identification of Y-hpt-MOF-1.

| Metal-to-Ligand (M:L) molar ratio, range | DMF solvent | Modulators |                      |                             |               |
|------------------------------------------|-------------|------------|----------------------|-----------------------------|---------------|
|                                          |             | 2-FBA      | CH <sub>3</sub> COOH | 2-FBA/CH <sub>3</sub> COOH  | HCOOH         |
| 3:1 to 8:1                               | 1 to 3 ml   | 0.1 to 1 g | 0.1 to 1 ml          | (100 mg – 1 g)/(0.1 – 1 ml) | 0.1 to 0.7 ml |

The presence of acetic acid is crucial in obtaining a high-quality crystalline material because the use of only 2-FBA afforded the formation of Y-hpt-MOF-1 with low crystallinity as confirmed by PXRD and not in a single crystal form (see Figure S21). This solid was isolated using 600 mg of 2-FBA under otherwise similar reaction conditions.

**Synthesis of Er-hpt-MOF-1:** A solution of 2.5 ml DMF, 250 mg 2-fluorobenzoic acid, 1ml acetic acid, 0.0082 g (0.0075 mmol) of H<sub>4</sub>MTBC-SO<sub>2</sub> and 13.3 mg (0.03 mmol) of Er(NO)<sub>3</sub>.5H<sub>2</sub>O were placed in a 20 ml glass scintillation vial. The vial was sealed and placed in an isothermal oven at 120 °C for 3 days. During this period, rhombohedral shaped light pink crystals were formed. (40% yield based on H<sub>4</sub>MBTC-SO<sub>2</sub>).

**Synthesis of Ho-hpt-MOF-1:** A solution of 2.5 ml DMF, 250 mg 2-fluorobenzoic acid, 1ml acetic acid, 0.0082 g (0.0075 mmol) of H<sub>4</sub>MTBC-SO<sub>2</sub> and 13.2 mg (0.03 mmol) of Ho(NO)<sub>3</sub>.5H<sub>2</sub>O were placed in a 20 ml glass scintillation vial. The vial was sealed and placed in an isothermal oven at 120 °C for 3 days. During this period, rhombohedral shaped pale orange crystals were formed. (40% yield based on H<sub>4</sub>MBTC-SO<sub>2</sub>).

**Synthesis of Y-ken-MOF-1:** A solution of 2.5 ml DMF, 250 mg 2-fluorobenzoic acid, 0.3 ml acetic acid, 0.006 g (0.0075 mmol) of H<sub>4</sub>MTBC and 11 mg (0.03 mmol) of Y(NO)<sub>3</sub>.6H<sub>2</sub>O were placed in a 20 ml glass scintillation vial. The vial was sealed and placed in an



isothermal oven at 120 °C for 3 days. During this period, hexagonal shaped pale yellow crystals were formed. (40% yield based on H<sub>4</sub>MBTC).

**Synthesis of Ho-ken-MOF-1:** A solution of 2.5 ml DMF, 250 mg 2-fluorobenzoic acid, 0.3 ml acetic acid, 0.006 g (0.0075 mmol) of H<sub>4</sub>MTBC and 11.5 mg (0.03 mmol) of Ho(NO)<sub>3</sub>·5H<sub>2</sub>O were placed in a 20 ml glass scintillation vial. The vial was sealed and placed in an isothermal oven at 120 °C for 3 days. During this period, hexagonal shaped pale pink crystals were formed. (40% yield based on H<sub>4</sub>MBTC).

**Synthesis of Er-ken-MOF-1:** A solution of 2.5 ml DMF, 250 mg 2-fluorobenzoic acid, 0.3 ml acetic acid, 0.006 g (0.0075 mmol) of H<sub>4</sub>MTBC and 11.5 mg (0.03 mmol) of Er(NO)<sub>3</sub>·5H<sub>2</sub>O were placed in a 20 ml glass scintillation vial. The vial was sealed and placed in an isothermal oven at 120 °C for 3 days. During this period, hexagonal shaped pink crystals were formed. (40% yield based on H<sub>4</sub>MBTC).

**Synthesis of Yb-ken-MOF-1:** A solution of 2.5 ml DMF, 250 mg 2-fluorobenzoic acid, 0.3 ml acetic acid, 0.006 g (0.0075 mmol) of H<sub>4</sub>MTBC and 11.5 mg (0.03 mmol) of Yb(NO)<sub>3</sub>·6H<sub>2</sub>O were placed in a 20 ml glass scintillation vial. The vial was sealed and placed in an isothermal oven at 120 °C for 3 days. During this period, small hexagonal shaped colorless crystals were formed. (40% yield based on H<sub>4</sub>MBTC).

### Scanning Electron Microscopy (SEM) Images

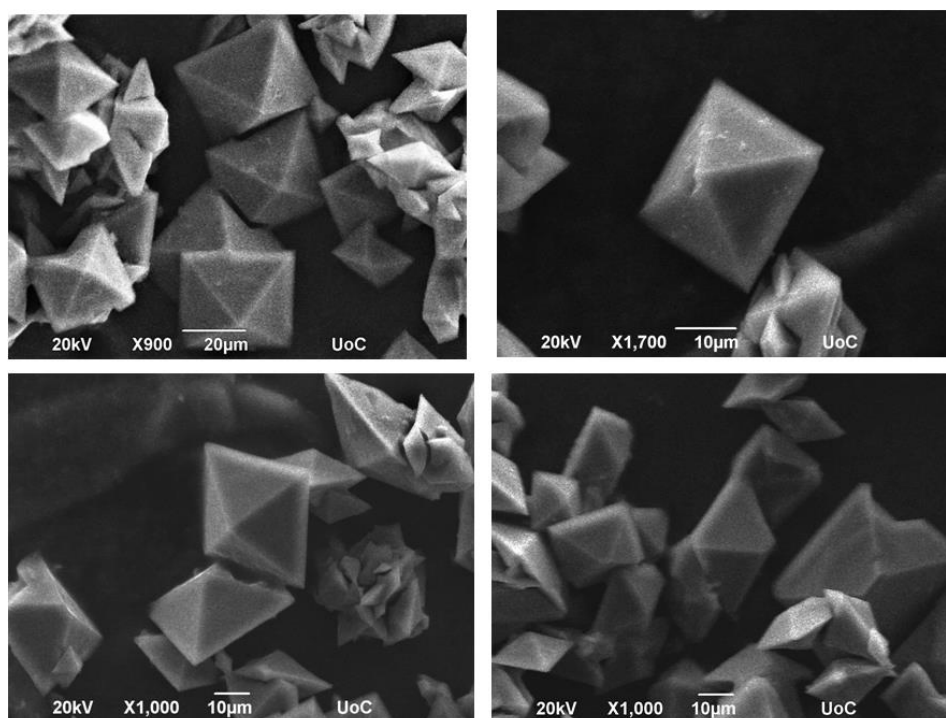

**Figure S6.** Scanning Electron Microscopy (SEM) images of the as made Zr-**flu**-SO<sub>2</sub> (top) and Hf-**flu**-SO<sub>2</sub> (bottom).

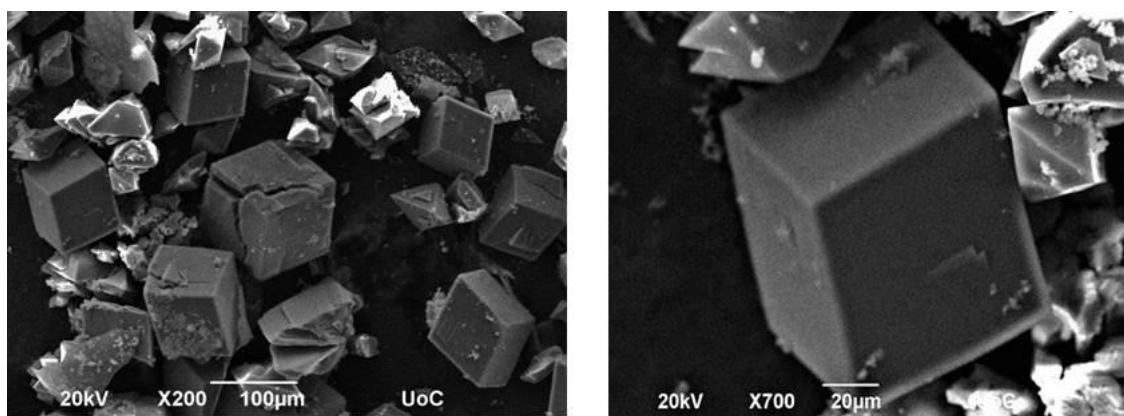

**Figure S7.** SEM images of the as-made Y-hpt-MOF-1 single crystals.

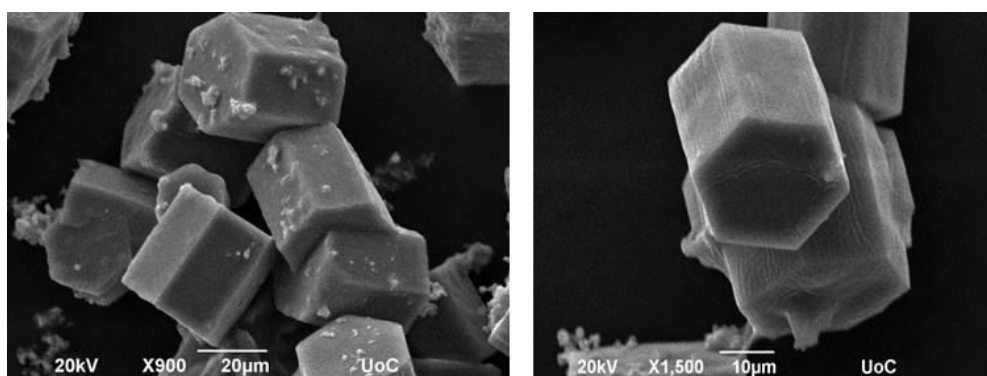

**Figure S8.** SEM images of as-made Y-ken-MOF-1 single crystals.

## Single crystal X-ray crystallography and structural figures

### Data for Zr-flu-SO<sub>2</sub>

A total of 781 frames were collected. The total exposure time was 7.81 hours. The frames were integrated with the Bruker SAINT software package using a narrow-frame algorithm. The integration of the data using a **tetragonal** unit cell yielded a total of **88583** reflections to a maximum  $\theta$  angle of **54.38°** (**0.95 Å** resolution), of which **5902** were independent (average redundancy **15.009**, completeness = **99.6%**,  $R_{\text{int}} = \mathbf{9.51\%}$ ,  $R_{\text{sig}} = \mathbf{4.55\%}$ ) and **4581** (**77.62%**) were greater than  $2\sigma(F^2)$ . The final cell constants of  $a = \mathbf{24.6334(16) \text{ Å}}$ ,  $b = \mathbf{24.6334(16) \text{ Å}}$ ,  $c = \mathbf{29.830(2) \text{ Å}}$ , volume = **18101.3 Å<sup>3</sup>**, are based upon the refinement of the XYZ-centroids of **9873** reflections above  $20 \sigma(I)$  with  $8.024^\circ < 2\theta < \mathbf{108.7^\circ}$ . Data were corrected for absorption effects using the Multi-Scan method (SADABS). The ratio of minimum to maximum apparent transmission was **0.563**. The calculated minimum and maximum transmission coefficients (based on crystal size) are **0.0090** and **0.0110**.

The structure was solved and refined using the Bruker SHELXTL Software Package, using the space group **P 42/m n m**, with  $Z = 2$  for the formula unit, **C<sub>106</sub>H<sub>48</sub>O<sub>48</sub>S<sub>8</sub>Zr<sub>6</sub>**. The final anisotropic full-matrix least-squares refinement on  $F^2$  with **199** variables converged at  $R1 = \mathbf{12.98\%}$ , for the observed data and  $wR2 = \mathbf{40.21\%}$  for all data. The goodness-of-fit was **1.729**. The largest peak in the final difference electron density synthesis was **1.439 e<sup>-</sup>/Å<sup>3</sup>** and the largest hole was **-0.850 e<sup>-</sup>/Å<sup>3</sup>** with an RMS deviation of **0.191 e<sup>-</sup>/Å<sup>3</sup>**. On the basis of the final model, the calculated density was **0.531 g/cm<sup>3</sup>** and  $F(000)$ , **2872 e<sup>-</sup>**. CCDC No.: 2012455.

**Table S2.** Sample and crystal data for **Zr-flu-SO<sub>2</sub>**.

|                                            |                                                                                                                                                       |         |
|--------------------------------------------|-------------------------------------------------------------------------------------------------------------------------------------------------------|---------|
| <b>Identification code</b>                 | Zr-flu-SO <sub>2</sub>                                                                                                                                |         |
| <b>Chemical formula</b>                    | C <sub>106</sub> H <sub>48</sub> O <sub>48</sub> S <sub>8</sub> Zr <sub>6</sub>                                                                       |         |
| <b>Formula weight</b>                      | 2893.24 g/mol                                                                                                                                         |         |
| <b>Temperature</b>                         | 200(2) K                                                                                                                                              |         |
| <b>Wavelength</b>                          | 1.54184 Å                                                                                                                                             |         |
| <b>Crystal size</b>                        | 0.025 x 0.025 x 0.040 mm                                                                                                                              |         |
| <b>Crystal system</b>                      | Tetragonal                                                                                                                                            |         |
| <b>Space group</b>                         | P 4 <sub>2</sub> /m n m                                                                                                                               |         |
| <b>Unit cell dimensions</b>                | a = 24.6334(16) Å                                                                                                                                     | α = 90° |
|                                            | b = 24.6334(16) Å                                                                                                                                     | β = 90° |
|                                            | c = 29.830(2) Å                                                                                                                                       | γ = 90° |
| <b>Volume</b>                              | 18101.(3) Å <sup>3</sup>                                                                                                                              |         |
| <b>Z</b>                                   | 2                                                                                                                                                     |         |
| <b>Density (calculated)</b>                | 0.531 g/cm <sup>3</sup>                                                                                                                               |         |
| <b>Absorption coefficient</b>              | 2.052 mm <sup>-1</sup>                                                                                                                                |         |
| <b>F(000)</b>                              | 2872                                                                                                                                                  |         |
| <b>Theta range for data collection</b>     | 2.94 to 54.38°                                                                                                                                        |         |
| <b>Index ranges</b>                        | -24<=h<=25, -25<=k<=21, -31<=l<=30                                                                                                                    |         |
| <b>Reflections collected</b>               | 88583                                                                                                                                                 |         |
| <b>Independent reflections</b>             | 5902 [R(int) = 0.0951]                                                                                                                                |         |
| <b>Coverage of independent reflections</b> | 99.6%                                                                                                                                                 |         |
| <b>Absorption correction</b>               | Multi-Scan                                                                                                                                            |         |
| <b>Max. and min. transmission</b>          | 0.0110 and 0.0090                                                                                                                                     |         |
| <b>Structure solution technique</b>        | direct methods                                                                                                                                        |         |
| <b>Structure solution program</b>          | SHELXT 2014/5 (Sheldrick, 2014)                                                                                                                       |         |
| <b>Refinement method</b>                   | Full-matrix least-squares on F <sup>2</sup>                                                                                                           |         |
| <b>Refinement program</b>                  | SHELXL-2018/3 (Sheldrick, 2018)                                                                                                                       |         |
| <b>Function minimized</b>                  | Σ w(F <sub>o</sub> <sup>2</sup> - F <sub>c</sub> <sup>2</sup> ) <sup>2</sup>                                                                          |         |
| <b>Data / restraints / parameters</b>      | 5902 / 0 / 199                                                                                                                                        |         |
| <b>Goodness-of-fit on F<sup>2</sup></b>    | 1.729                                                                                                                                                 |         |
| <b>Δ/σ<sub>max</sub></b>                   | 0.004                                                                                                                                                 |         |
| <b>Final R indices</b>                     | 4581 data; R1 = 0.1298, wR2 = 0.3792<br>I>2σ(I)                                                                                                       |         |
|                                            | all data R1 = 0.1483, wR2 = 0.4021                                                                                                                    |         |
| <b>Weighting scheme</b>                    | w=1/[σ <sup>2</sup> (F <sub>o</sub> <sup>2</sup> )+(0.2000P) <sup>2</sup> ]<br>where P=(F <sub>o</sub> <sup>2</sup> +2F <sub>c</sub> <sup>2</sup> )/3 |         |
| <b>Largest diff. peak and hole</b>         | 1.439 and -0.850 eÅ <sup>-3</sup>                                                                                                                     |         |
| <b>R.M.S. deviation from mean</b>          | 0.191 eÅ <sup>-3</sup>                                                                                                                                |         |

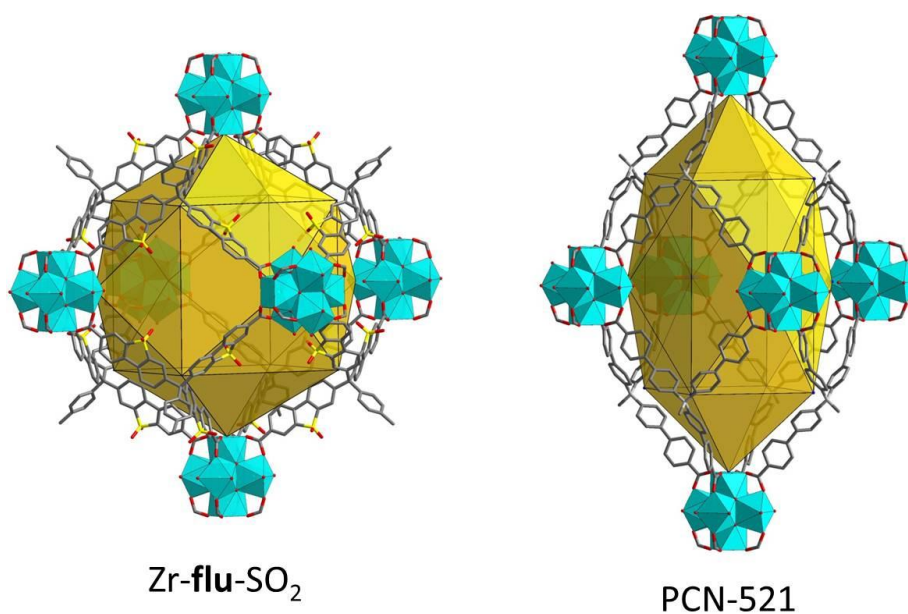

**Figure S9.** The polyhedral cavity in Zr-**flu**-SO<sub>2</sub> (left) and PCN-521 (right).

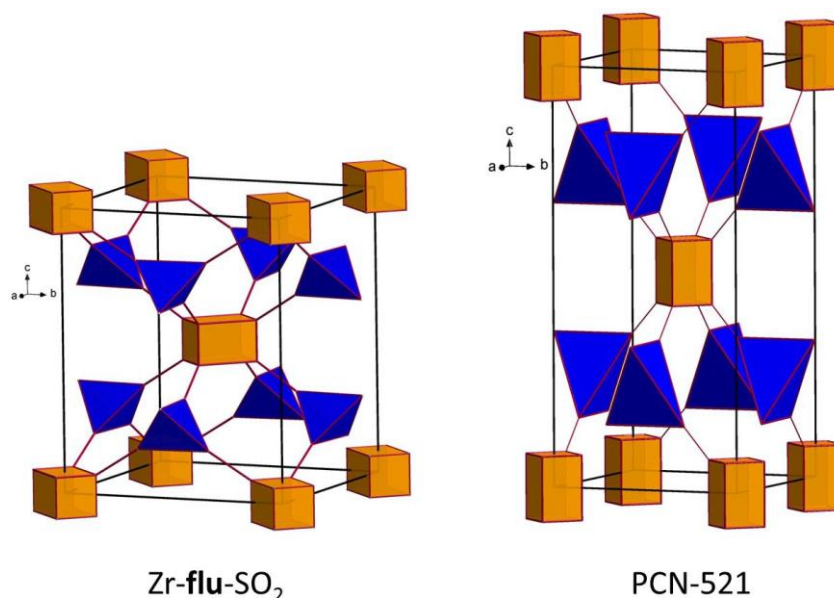

**Figure S10.** The **flu**-a net in Zr-**flu**-SO<sub>2</sub> (left) and PCN-521 (right). Note that in Zr-**flu**-SO<sub>2</sub> the central Zr<sub>6</sub>-cluster is rotated by 90° around the c-axis relative to those at the corners, where in PCN-521 all clusters have the same relative positioning.

#### Data for Hf-**flu**-SO<sub>2</sub>

A total of 1564 frames were collected. The total exposure time was 25.28 hours. The frames were integrated with the Bruker SAINT software package using a narrow-frame algorithm. The integration of the data using a [tetragonal](#) unit cell yielded a total of [89136](#) reflections to a maximum  $\theta$  angle of [55.37°](#) ([0.94 Å](#) resolution), of which [5936](#) were independent (average redundancy [15.016](#), completeness = [97.1%](#),  $R_{\text{int}}$  = [10.20%](#),  $R_{\text{sig}}$  = [4.44%](#)) and [4569](#) ([76.97%](#)) were greater than  $2\sigma(F^2)$ . The final cell constants of  $a = \text{23.955(2) Å}$ ,  $b = \text{23.955(2) Å}$ ,  $c = \text{31.402(4) Å}$ , volume = [18020.\(4\) Å<sup>3</sup>](#), are based upon the refinement of the XYZ-centroids of [9469](#) reflections above  $20\sigma(I)$  with  $4.639^\circ < 2\theta < 108.2^\circ$ . Data were corrected for absorption effects using the Multi-Scan method (SADABS). The ratio of minimum to maximum apparent transmission was [0.733](#). The

calculated minimum and maximum transmission coefficients (based on crystal size) are 0.8790 and 0.9120.

The structure was solved and refined using the Bruker SHELXTL Software Package, using the space group  $P 4_2/m n m$ , with  $Z = 2$  for the formula unit,  $C_{106}H_{48}Hf_6O_{48}S_8$ . The final anisotropic full-matrix least-squares refinement on  $F^2$  with 199 variables converged at  $R1 = 9.95\%$ , for the observed data and  $wR2 = 33.13\%$  for all data. The goodness-of-fit was 1.347. The largest peak in the final difference electron density synthesis was  $1.571 \text{ e}^-/\text{\AA}^3$  and the largest hole was  $-1.434 \text{ e}^-/\text{\AA}^3$  with an RMS deviation of  $0.208 \text{ e}^-/\text{\AA}^3$ . On the basis of the final model, the calculated density was  $0.630 \text{ g/cm}^3$  and  $F(000)$ , 3256  $e^-$ . CCDC No.: 2012452.

**Table S3.** Sample and crystal data for Hf-flu-SO<sub>2</sub>.

|                                                |                                                                    |                     |
|------------------------------------------------|--------------------------------------------------------------------|---------------------|
| <b>Chemical formula</b>                        | $C_{106}H_{48}Hf_6O_{48}S_8$                                       |                     |
| <b>Formula weight</b>                          | 3416.86 g/mol                                                      |                     |
| <b>Temperature</b>                             | 200(2) K                                                           |                     |
| <b>Wavelength</b>                              | 1.54178 Å                                                          |                     |
| <b>Crystal size</b>                            | 0.025 x 0.025 x 0.035 mm                                           |                     |
| <b>Crystal system</b>                          | tetragonal                                                         |                     |
| <b>Space group</b>                             | $P 4_2/m n m$                                                      |                     |
| <b>Unit cell dimensions</b>                    | $a = 23.955(2) \text{ Å}$                                          | $\alpha = 90^\circ$ |
|                                                | $b = 23.955(2) \text{ Å}$                                          | $\beta = 90^\circ$  |
|                                                | $c = 31.402(4) \text{ Å}$                                          | $\gamma = 90^\circ$ |
| <b>Volume</b>                                  | $18020.(4) \text{ Å}^3$                                            |                     |
| <b>Z</b>                                       | 2                                                                  |                     |
| <b>Density (calculated)</b>                    | $0.630 \text{ g/cm}^3$                                             |                     |
| <b>Absorption coefficient</b>                  | $3.773 \text{ mm}^{-1}$                                            |                     |
| <b><math>F(000)</math></b>                     | 3256                                                               |                     |
| <b>Theta range for data collection</b>         | 2.32 to $55.37^\circ$                                              |                     |
| <b>Index ranges</b>                            | $-25 \leq h \leq 21$ , $-23 \leq k \leq 25$ , $-33 \leq l \leq 33$ |                     |
| <b>Reflections collected</b>                   | 89136                                                              |                     |
| <b>Independent reflections</b>                 | 5936 [ $R(\text{int}) = 0.1020$ ]                                  |                     |
| <b>Coverage of independent reflections</b>     | 97.1%                                                              |                     |
| <b>Absorption correction</b>                   | Multi-Scan                                                         |                     |
| <b>Max. and min. transmission</b>              | 0.9120 and 0.8790                                                  |                     |
| <b>Structure solution technique</b>            | direct methods                                                     |                     |
| <b>Structure solution program</b>              | SHELXT 2014/5 (Sheldrick, 2014)                                    |                     |
| <b>Refinement method</b>                       | Full-matrix least-squares on $F^2$                                 |                     |
| <b>Refinement program</b>                      | SHELXL-2018/3 (Sheldrick, 2018)                                    |                     |
| <b>Function minimized</b>                      | $\Sigma w(F_o^2 - F_c^2)^2$                                        |                     |
| <b>Data / restraints / parameters</b>          | 5936 / 0 / 199                                                     |                     |
| <b>Goodness-of-fit on <math>F^2</math></b>     | 1.347                                                              |                     |
| <b><math>\Delta/\sigma_{\text{max}}</math></b> | 0.004                                                              |                     |
| <b>Final R indices</b>                         | 4569 data; $R1 = 0.0995$ , $wR2 = 0.3146$                          |                     |
|                                                | $I > 2\sigma(I)$                                                   |                     |
| <b>Weighting scheme</b>                        | all data $R1 = 0.1133$ , $wR2 = 0.3313$                            |                     |
|                                                | $w = 1/[\sigma^2(F_o^2) + (0.2000P)^2]$                            |                     |
| <b>Largest diff. peak and hole</b>             | where $P = (F_o^2 + 2F_c^2)/3$                                     |                     |
|                                                | $1.571$ and $-1.434 \text{ e}^-/\text{\AA}^3$                      |                     |

## Data for Y-hpt-MOF-1

A total of 1023 frames were collected. The total exposure time was 5.68 hours. The frames were integrated with the Bruker SAINT software package using a narrow-frame algorithm. The integration of the data using a trigonal unit cell yielded a total of 60018 reflections to a maximum  $\theta$  angle of 45.19° (1.09 Å resolution), of which 6367 were independent (average redundancy 9.426, completeness = 99.7%,  $R_{\text{int}} = 3.87\%$ ,  $R_{\text{sig}} = 2.05\%$ ) and 5615 (88.19%) were greater than  $2\sigma(F^2)$ . The final cell constants of  $a = 39.5393(14)$  Å,  $b = 39.5393(14)$  Å,  $c = 48.8586(19)$  Å, volume = 66150.(5) Å<sup>3</sup>, are based upon the refinement of the XYZ-centroids of 9927 reflections above  $20\sigma(I)$  with  $5.427^\circ < 2\theta < 94.91^\circ$ . Data were corrected for absorption effects using the Multi-Scan method (SADABS). The ratio of minimum to maximum apparent transmission was 0.764. The structure was solved and refined using the Bruker SHELXTL Software Package, using the space group R -3 m, with Z = 6 for the formula unit, C<sub>161</sub>H<sub>75</sub>O<sub>71</sub>S<sub>12</sub>Y<sub>9</sub>. The final anisotropic full-matrix least-squares refinement on F<sup>2</sup> with 399 variables converged at R1 = 14.53%, for the observed data and wR2 = 44.81% for all data. The goodness-of-fit was 2.223. The largest peak in the final difference electron density synthesis was 2.416 e<sup>-</sup>/Å<sup>3</sup> and the largest hole was -0.805 e<sup>-</sup>/Å<sup>3</sup> with an RMS deviation of 0.228 e<sup>-</sup>/Å<sup>3</sup>. On the basis of the final model, the calculated density was 0.652 g/cm<sup>3</sup> and F(000), 12912 e<sup>-</sup>. CCDC No.: 2012453.

**Table S4.** Sample and crystal data for Y-hpt-MOF-1.

|                                     |                                                                                 |                      |
|-------------------------------------|---------------------------------------------------------------------------------|----------------------|
| Identification code                 | Y-hpt-MOF-1                                                                     |                      |
| Chemical formula                    | C <sub>161</sub> H <sub>75</sub> O <sub>71</sub> S <sub>12</sub> Y <sub>9</sub> |                      |
| Formula weight                      | 4330.12 g/mol                                                                   |                      |
| Temperature                         | 200(2) K                                                                        |                      |
| Wavelength                          | 1.54178 Å                                                                       |                      |
| Crystal system                      | trigonal                                                                        |                      |
| Space group                         | R -3 m                                                                          |                      |
| Unit cell dimensions                | a = 39.5393(14) Å                                                               | $\alpha = 90^\circ$  |
|                                     | b = 39.5393(14) Å                                                               | $\beta = 90^\circ$   |
|                                     | c = 48.8586(19) Å                                                               | $\gamma = 120^\circ$ |
| Volume                              | 66150.(5) Å <sup>3</sup>                                                        |                      |
| Z                                   | 6                                                                               |                      |
| Density (calculated)                | 0.652 g/cm <sup>3</sup>                                                         |                      |
| Absorption coefficient              | 2.362 mm <sup>-1</sup>                                                          |                      |
| F(000)                              | 12912                                                                           |                      |
| Theta range for data collection     | 2.71 to 45.19°                                                                  |                      |
| Index ranges                        | -36 ≤ h ≤ 31, -26 ≤ k ≤ 36, -44 ≤ l ≤ 44                                        |                      |
| Reflections collected               | 60018                                                                           |                      |
| Independent reflections             | 6367 [R(int) = 0.0387]                                                          |                      |
| Coverage of independent reflections | 99.7%                                                                           |                      |
| Absorption correction               | Multi-Scan                                                                      |                      |
| Structure solution technique        | direct methods                                                                  |                      |
| Structure solution program          | SHELXT 2014/5 (Sheldrick, 2014)                                                 |                      |
| Refinement method                   | Full-matrix least-squares on F <sup>2</sup>                                     |                      |
| Refinement program                  | SHELXL-2018/3 (Sheldrick, 2018)                                                 |                      |



|                                |                                                                           |
|--------------------------------|---------------------------------------------------------------------------|
| Function minimized             | $\Sigma w(F_o^2 - F_c^2)^2$                                               |
| Data / restraints / parameters | 6367 / 21 / 399                                                           |
| Goodness-of-fit on $F^2$       | 2.223                                                                     |
| $\Delta/\sigma_{\max}$         | 0.002                                                                     |
| Final R indices                | 5615 data; $R1 = 0.1453$ , $wR2 = 0.4360$<br>$I > 2\sigma(I)$             |
|                                | all data $R1 = 0.1525$ , $wR2 = 0.4481$                                   |
| Weighting scheme               | $w = 1/[\sigma^2(F_o^2) + (0.2000P)^2]$<br>where $P = (F_o^2 + 2F_c^2)/3$ |
| Largest diff. peak and hole    | 2.416 and $-0.805 \text{ e}\text{\AA}^{-3}$                               |
| R.M.S. deviation from mean     | $0.228 \text{ e}\text{\AA}^{-3}$                                          |

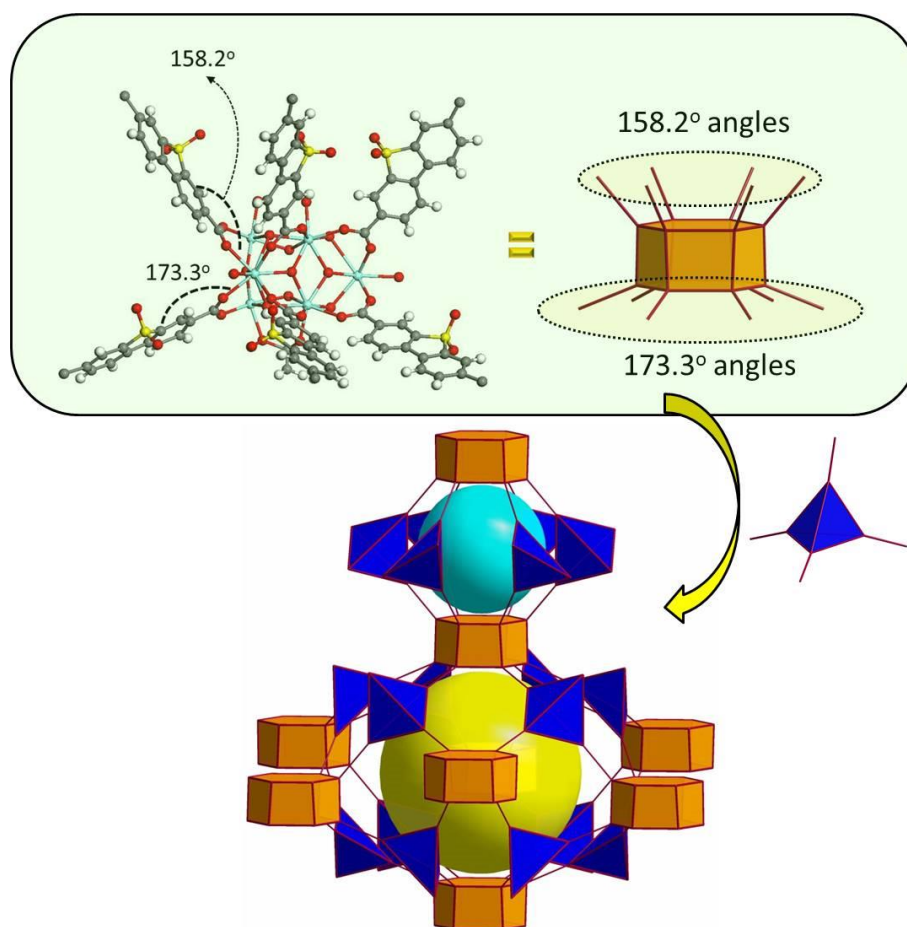

**Figure S11.** The different coordination angles of the linkers above and below the nonanuclear hexagonal prismatic Y-cluster, results in the formation of two different cavities shown with a light blue and a yellow sphere.

Data for Er-**hpt**-MOF-1.

A specimen of  $C_{163}H_{75}Er_9O_{71}S_{12}$ , approximate dimensions  $0.025 \text{ mm} \times 0.050 \text{ mm} \times 0.050 \text{ mm}$ , was used for the X-ray crystallographic analysis. The X-ray intensity data were measured ( $\lambda = 1.54178 \text{ \AA}$ ). The integration of the data using a **trigonal** unit cell yielded a total of **76146** reflections to a maximum  $\theta$  angle of  $44.53^\circ$  ( $1.10 \text{ \AA}$  resolution), of which **6153** were independent (average redundancy **12.375**, completeness = **99.8%**,  $R_{\text{int}} = 3.81\%$ ,  $R_{\text{sig}} = 1.76\%$ )

and 5467 (88.85%) were greater than  $2\sigma(F^2)$ . The final cell constants of  $a = 39.524(2)$  Å,  $b = 39.524(2)$  Å,  $c = 48.846(3)$  Å, volume =  $66082.8(8)$  Å<sup>3</sup>, are based upon the refinement of the XYZ-centroids of reflections above  $20\sigma(I)$ . The calculated minimum and maximum transmission coefficients (based on crystal size) are 0.8300 and 0.9090. The final anisotropic full-matrix least-squares refinement on  $F^2$  with 405 variables converged at  $R1 = 10.16\%$ , for the observed data and  $wR2 = 36.35\%$  for all data. The goodness-of-fit was 1.781. The largest peak in the final difference electron density synthesis was  $4.106$  e<sup>-</sup>/Å<sup>3</sup> and the largest hole was  $-0.956$  e<sup>-</sup>/Å<sup>3</sup> with an RMS deviation of  $0.211$  e<sup>-</sup>/Å<sup>3</sup>. On the basis of the final model, the calculated density was  $0.763$  g/cm<sup>3</sup> and  $F(000)$ , 14550 e<sup>-</sup>. CCDC No.: 2012451.

**Table S5.** Sample and crystal data for Er-hpt-MOF-1.

|                                 |                                                                                  |                                |
|---------------------------------|----------------------------------------------------------------------------------|--------------------------------|
| Identification code             | Er-hpt-MOF-1                                                                     |                                |
| Chemical formula                | C <sub>163</sub> H <sub>75</sub> Er <sub>9</sub> O <sub>71</sub> S <sub>12</sub> |                                |
| Formula weight                  | 5059.29 g/mol                                                                    |                                |
| Temperature                     | 200(2) K                                                                         |                                |
| Wavelength                      | 1.54178 Å                                                                        |                                |
| Crystal size                    | 0.025 x 0.050 x 0.050 mm                                                         |                                |
| Crystal system                  | trigonal                                                                         |                                |
| Space group                     | R $\bar{3}$ m                                                                    |                                |
| Unit cell dimensions            | $a = 39.524(2)$ Å                                                                | $\alpha = 90^\circ$            |
|                                 | $b = 39.524(2)$ Å                                                                | $\beta = 90^\circ$             |
|                                 | $c = 48.846(3)$ Å                                                                | $\gamma = 120^\circ$           |
| Volume                          | $66082.8(8)$ Å <sup>3</sup>                                                      |                                |
| Z                               | 6                                                                                |                                |
| Density (calculated)            | $0.763$ g/cm <sup>3</sup>                                                        |                                |
| Absorption coefficient          | $3.870$ mm <sup>-1</sup>                                                         |                                |
| $F(000)$                        | 14550                                                                            |                                |
| Theta range for data collection | $2.71$ to $44.53^\circ$                                                          |                                |
| Index ranges                    | $-35 \leq h \leq 35$ , $-35 \leq k \leq 35$ , $-44 \leq l \leq 44$               |                                |
| Reflections collected           | 76146                                                                            |                                |
| Independent reflections         | 6153 [ $R(\text{int}) = 0.0381$ ]                                                |                                |
| Max. and min. transmission      | 0.9090 and 0.8300                                                                |                                |
| Refinement method               | Full-matrix least-squares on $F^2$                                               |                                |
| Refinement program              | SHELXL-2018/3 (Sheldrick, 2018)                                                  |                                |
| Function minimized              | $\sum w(F_o^2 - F_c^2)^2$                                                        |                                |
| Data / restraints / parameters  | 6153 / 43 / 405                                                                  |                                |
| Goodness-of-fit on $F^2$        | 1.781                                                                            |                                |
| $\Delta/\sigma_{\text{max}}$    | 0.002                                                                            |                                |
| Final R indices                 | 5467 data;<br>$I > 2\sigma(I)$                                                   | $R1 = 0.1016$ , $wR2 = 0.3488$ |
|                                 | all data                                                                         | $R1 = 0.1079$ , $wR2 = 0.3635$ |
| Weighting scheme                | $w = 1/[\sigma^2(F_o^2) + (0.2000P)^2]$                                          |                                |
|                                 | where $P = (F_o^2 + 2F_c^2)/3$                                                   |                                |
| Largest diff. peak and hole     | $4.106$ and $-0.956$ eÅ <sup>-3</sup>                                            |                                |
| R.M.S. deviation from mean      | $0.211$ eÅ <sup>-3</sup>                                                         |                                |



### Data for Ho-hpt-MOF-1

A total of 1947 frames were collected. The total exposure time was 21.89 hours. The frames were integrated with the Bruker SAINT software package using a narrow-frame algorithm. The integration of the data using a trigonal unit cell yielded a total of 37970 reflections to a maximum  $\theta$  angle of  $44.78^\circ$  (1.09 Å resolution), of which 6099 were independent (average redundancy 6.226, completeness = 98.4%,  $R_{\text{int}} = 6.79\%$ ,  $R_{\text{sig}} = 4.77\%$ ) and 4863 (79.73%) were greater than  $2\sigma(F^2)$ . The final cell constants of  $a = 39.4817(19)$  Å,  $b = 39.4817(19)$  Å,  $c = 48.507(3)$  Å, volume =  $65483.(7)$  Å<sup>3</sup>, are based upon the refinement of the XYZ-centroids of 9956 reflections above  $20\sigma(I)$  with  $7.751^\circ < 2\theta < 89.47^\circ$ . Data were corrected for absorption effects using the Multi-Scan method (SADABS). The ratio of minimum to maximum apparent transmission was 0.654. The structure was solved and refined using the Bruker SHELXTL Software Package, using the space group R -3 m, with Z = 6 for the formula unit, C<sub>161</sub>H<sub>75</sub>Ho<sub>9</sub>O<sub>71</sub>S<sub>12</sub>. The final anisotropic full-matrix least-squares refinement on F<sup>2</sup> with 398 variables converged at R1 = 15.13%, for the observed data and wR2 = 45.73% for all data. The goodness-of-fit was 2.069. The largest peak in the final difference electron density synthesis was 3.503 e<sup>-</sup>/Å<sup>3</sup> and the largest hole was -1.879 e<sup>-</sup>/Å<sup>3</sup> with an RMS deviation of 0.200 e<sup>-</sup>/Å<sup>3</sup>. On the basis of the final model, the calculated density was 0.763 g/cm<sup>3</sup> and F(000), 14424 e<sup>-</sup>. CCDC No.: 2012454.

**Table S6.** Sample and crystal data for Ho-hpt-MOF-1.

|                                     |                                                                                  |                      |
|-------------------------------------|----------------------------------------------------------------------------------|----------------------|
| Identification code                 | Ho-hpt-MOF-1.                                                                    |                      |
| Chemical formula                    | C <sub>161</sub> H <sub>75</sub> Ho <sub>9</sub> O <sub>71</sub> S <sub>12</sub> |                      |
| Formula weight                      | 5014.30 g/mol                                                                    |                      |
| Temperature                         | 200(2) K                                                                         |                      |
| Wavelength                          | 1.54178 Å                                                                        |                      |
| Crystal system                      | trigonal                                                                         |                      |
| Space group                         | R -3 m                                                                           |                      |
| Unit cell dimensions                | a = 39.4817(19) Å                                                                | $\alpha = 90^\circ$  |
|                                     | b = 39.4817(19) Å                                                                | $\beta = 90^\circ$   |
|                                     | c = 48.507(3) Å                                                                  | $\gamma = 120^\circ$ |
| Volume                              | 65483.(7) Å <sup>3</sup>                                                         |                      |
| Z                                   | 6                                                                                |                      |
| Density (calculated)                | 0.763 g/cm <sup>3</sup>                                                          |                      |
| Absorption coefficient              | 3.739 mm <sup>-1</sup>                                                           |                      |
| F(000)                              | 14424                                                                            |                      |
| Theta range for data collection     | 3.54 to 44.78°                                                                   |                      |
| Index ranges                        | -33 ≤ h ≤ 35, -35 ≤ k ≤ 35, -43 ≤ l ≤ 44                                         |                      |
| Reflections collected               | 37970                                                                            |                      |
| Independent reflections             | 6099 [R(int) = 0.0679]                                                           |                      |
| Coverage of independent reflections | 98.4%                                                                            |                      |
| Absorption correction               | Multi-Scan                                                                       |                      |
| Structure solution technique        | direct methods                                                                   |                      |
| Structure solution program          | SHELXT 2014/5 (Sheldrick, 2014)                                                  |                      |
| Refinement method                   | Full-matrix least-squares on F <sup>2</sup>                                      |                      |
| Refinement program                  | SHELXL-2018/3 (Sheldrick, 2018)                                                  |                      |
| Function minimized                  | $\Sigma w(F_o^2 - F_c^2)^2$                                                      |                      |
| Data / restraints / parameters      | 6099 / 1 / 398                                                                   |                      |

|                             |                                                                           |
|-----------------------------|---------------------------------------------------------------------------|
| Goodness-of-fit on $F^2$    | 2.069                                                                     |
| $\Delta/\sigma_{\max}$      | 0.180                                                                     |
| Final R indices             | 4863 data; $R1 = 0.1513$ , $wR2 = 0.4235$<br>$I > 2\sigma(I)$             |
|                             | all data $R1 = 0.1752$ , $wR2 = 0.4573$                                   |
| Weighting scheme            | $w = 1/[\sigma^2(F_o^2) + (0.2000P)^2]$<br>where $P = (F_o^2 + 2F_c^2)/3$ |
| Largest diff. peak and hole | 3.503 and -1.879 $e\text{\AA}^{-3}$                                       |
| R.M.S. deviation from mean  | 0.200 $e\text{\AA}^{-3}$                                                  |

#### Data for Y-ken-MOF-1

A specimen of **C106 H64 O36 Y9** was used for the X-ray crystallographic analysis. The X-ray intensity data were measured ( $\lambda = 1.54178 \text{ \AA}$ ). The total exposure time was 9.90 hours. The frames were integrated with the Bruker SAINT software package using a narrow-frame algorithm. The integration of the data using a **trigonal** unit cell yielded a total of **172887** reflections to a maximum  $\theta$  angle of **44.59°** (**1.10**  $\text{\AA}$  resolution), of which **9775** were independent (completeness = **99.6%**,  $R_{\text{int}} = 3.66\%$ ). The final cell constants of  $a = 25.4495(5) \text{ \AA}$ ,  $b = 25.4495(5) \text{ \AA}$ ,  $c = 39.5438(8) \text{ \AA}$ , volume = **22180.3(10)  $\text{\AA}^3$** , are based upon the refinement of the XYZ-centroids of **9891** reflections above  $2\theta$  with  $7.297^\circ < 2\theta < 88.84^\circ$ . Data were corrected for absorption effects using the Multi-Scan method (SADABS). The ratio of minimum to maximum apparent transmission was **0.935**.

The nonanuclear  $[\text{Y}_9(\mu_3\text{-O})_2(\mu_3\text{-OH})_{12}(\text{OH})_2(\text{H}_2\text{O})_{11}]^{8+}$  cluster is statistically disorder over two positions which impose disorder also on the organic linker (see Figure S13 below). In particular, the six lateral ligands are 2-fold disordered while the axial ligands are 3-fold. Regarding the  $\text{Y}_9$ -cluster, the “upper” and “lower” Y-triangles were modelled with a 2-fold disorder however, the “middle” Y-triangle is not assigned to PARTs as all of its positions of both triangles are symmetry generated from one position (Figure S13). For this reason, the occupancy for this atom was set to 0.5 to fully describe the disorder.

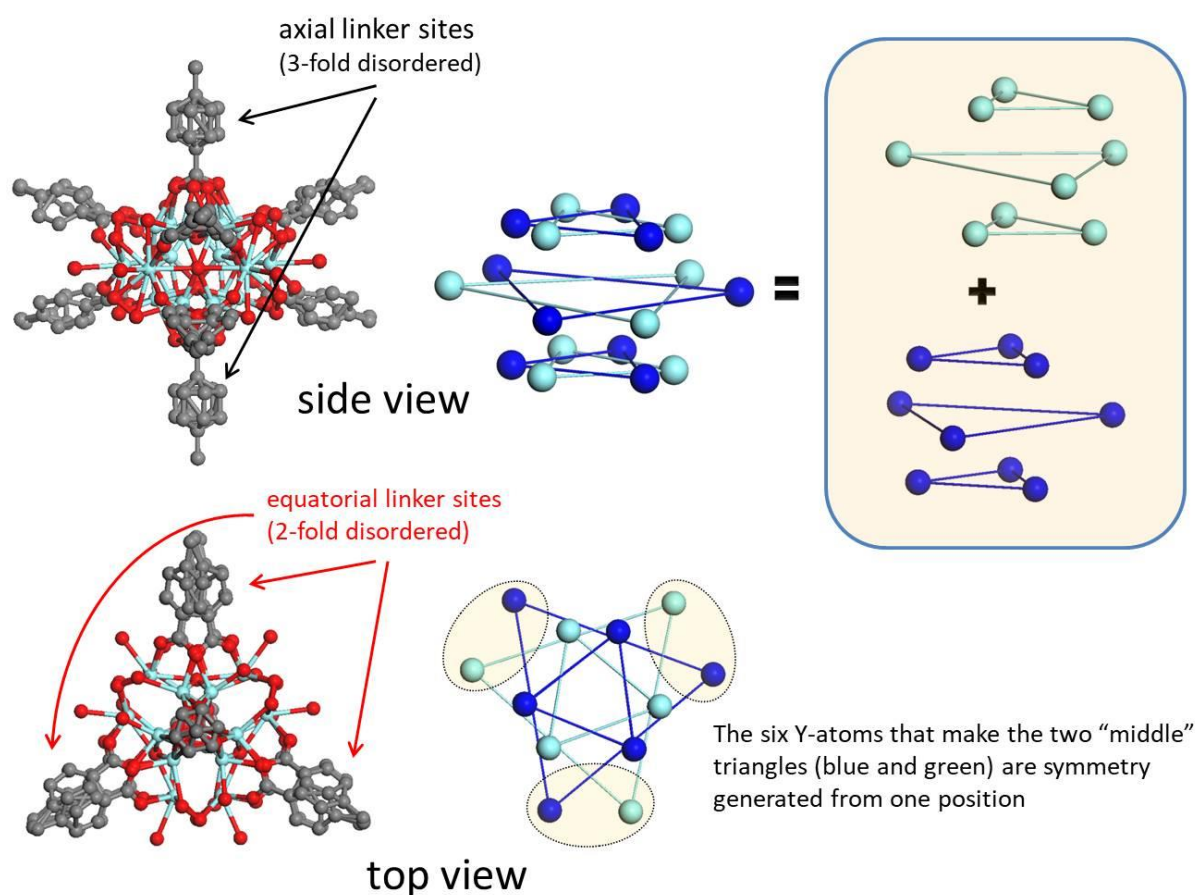

**Figure S12.** Structural disorder observed in Y-ken-MOF-1.

In addition to the observed disorder, merohedral twinning is also involved and included in the refinement. The final full-matrix least-squares refinement on  $F^2$  with 427 variables converged at  $R1 = 13.57\%$ , for the observed data and  $wR2 = 36.62\%$  for all data, after running SQUEEZE routine. The goodness-of-fit was 4.560. The largest peak in the final difference electron density synthesis was  $1.348 \text{ e}^-/\text{\AA}^3$  and the largest hole was  $-0.539 \text{ e}^-/\text{\AA}^3$ . The crystal and refinement data are summarized in Table 11. CCDC No.: 2012456.

**Table S7.** Crystal data and structure refinement for Y-ken-MOF-1.

|                      |                                                |
|----------------------|------------------------------------------------|
| Empirical formula    | C106 H64 O36 Y9                                |
| Formula weight       | 2713.76                                        |
| Temperature          | 200(2) K                                       |
| Wavelength           | 1.54178 Å                                      |
| Crystal system       | trigonal                                       |
| Space group          | P -3 1 c                                       |
| Unit cell dimensions | $a = 25.4495(5) \text{ Å}, \alpha = 90^\circ$  |
|                      | $b = 25.4495(5) \text{ Å}, \beta = 90^\circ$   |
|                      | $c = 39.5438(8) \text{ Å}, \gamma = 120^\circ$ |
| Volume               | $22180.3(10) \text{ Å}^3$                      |
| Z                    | 2                                              |
| Density (calculated) | $0.406 \text{ g/cm}^3$                         |

|                                         |                                                       |
|-----------------------------------------|-------------------------------------------------------|
| Absorption coefficient                  | 1.670 mm <sup>-1</sup>                                |
| F(000)                                  | 2678                                                  |
| Crystal size                            | 0.06 x 0.03 x 0.03 mm <sup>3</sup>                    |
| $\theta$ range for data collection      | 2.004 to 56.408°                                      |
| Index ranges                            | -27 ≤ h ≤ 27, -23 ≤ k ≤ 27, -41 ≤ l ≤ 42              |
| Reflections collected                   | 172887                                                |
| Independent reflections                 | 9775 [R <sub>int</sub> = 0.0366]                      |
| Completeness to $\theta = 56.408^\circ$ | 99.8%                                                 |
| Refinement method                       | Full-matrix least-squares on F <sup>2</sup>           |
| Data / restraints / parameters          | 9775 / 963 / 427                                      |
| Goodness-of-fit                         | 4.560                                                 |
| Final R indices [I > 2 $\sigma$ (I)]    | R <sub>obs</sub> = 0.1357, wR <sub>obs</sub> = 0.3662 |
| R indices [all data]                    | R <sub>all</sub> = 0.1682, wR <sub>all</sub> = 0.3768 |
| Extinction coefficient                  | .                                                     |
| Largest diff. peak and hole             | 1.348 and -0.539 e <sup>-</sup> Å <sup>-3</sup>       |

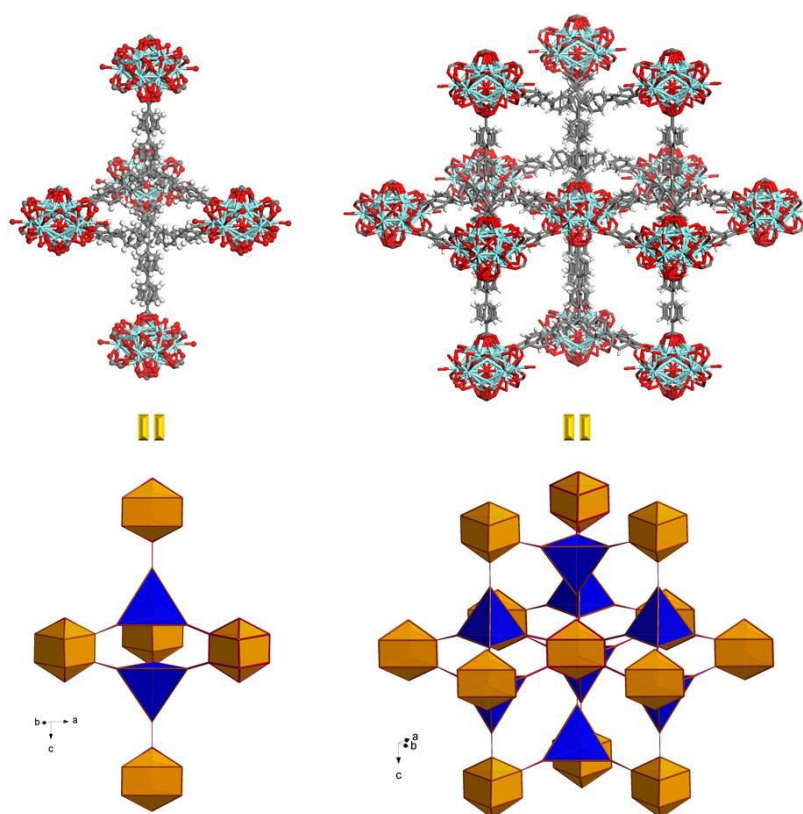

**Figure S13.** Along the c-axis in Y-ken-MOF-1, pairs of opposite linkers are formed and connect six Y<sub>9</sub>-clusters in a regular trigonal prismatic arrangement (left). Each Y<sub>9</sub>-cluster is connected to twelve other Y<sub>9</sub>-clusters, six in equatorial position via three pairs of linkers and six more, three on the top and three on the bottom, via two more linkers (right).

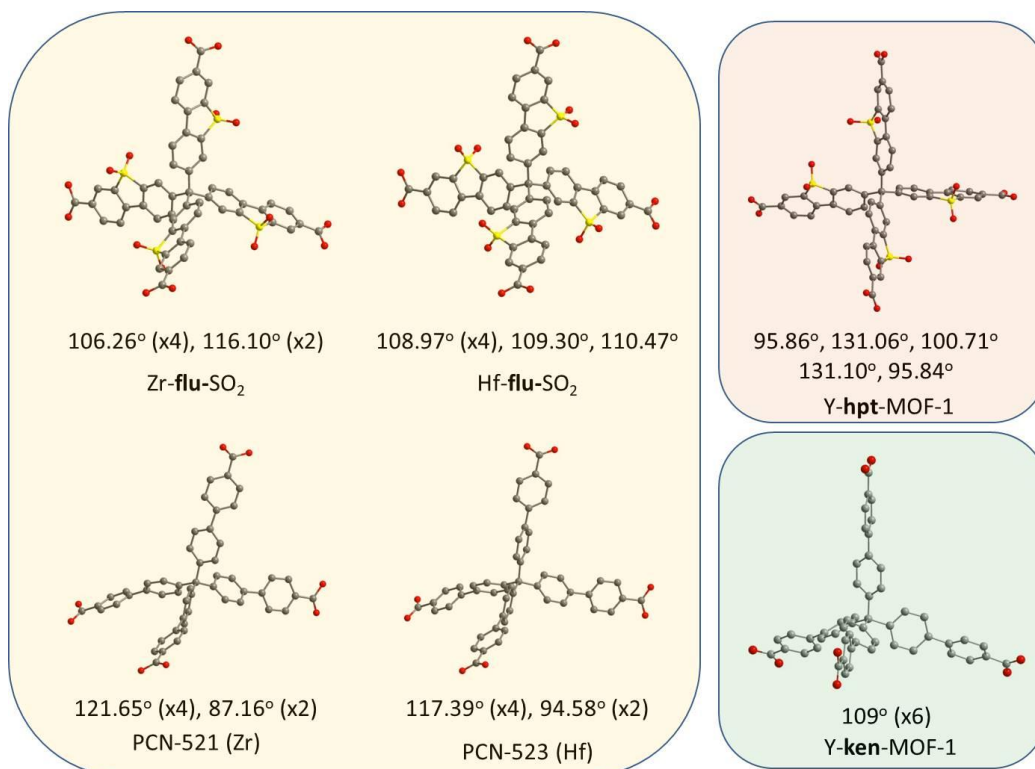

**Figure S14.** Ligand conformation in the indicated MOFs, as revealed by SCXRD.

### Powder X-ray diffraction measurements

The phase purity and stability in different solvents of M-**flu**-SO<sub>2</sub> (M: Zr, Hf) was verified using powder X-ray diffraction (PXRD) analysis.

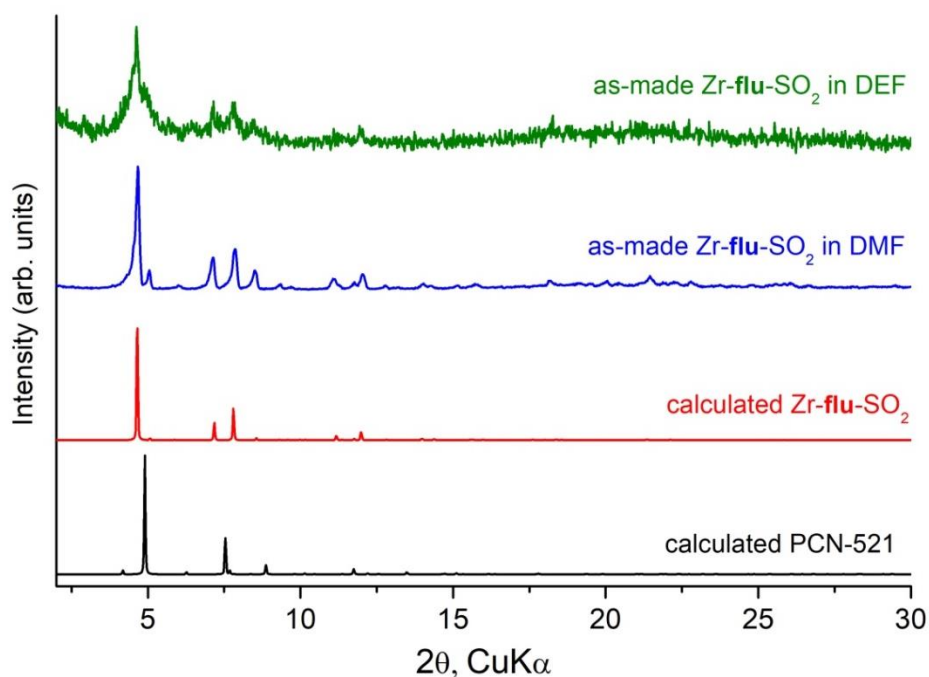

**Figure S15.** Experimental PXRD pattern of as-made Zr-**flu**-SO<sub>2</sub> synthesized in DMF (blue) and DEF (green), along with the calculated pattern from the corresponding single crystal structure of Zr-**flu**-SO<sub>2</sub> (red) and PCN-521 (black).

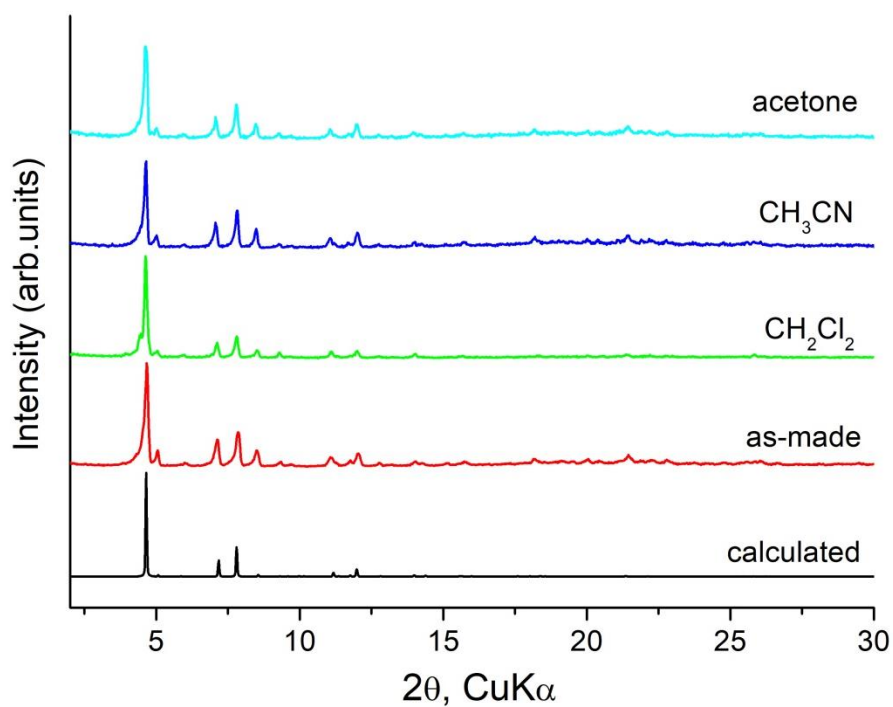

**Figure S16.** Experimental PXRD pattern of as-made Zr-**flu**- $\text{SO}_2$  (red), along with the calculated pattern from the corresponding single crystal structure (black). PXRD pattern of Zr-**flu**- $\text{SO}_2$  after exchange with dichloromethane (green), acetonitrile (dark blue) and acetone (light blue).

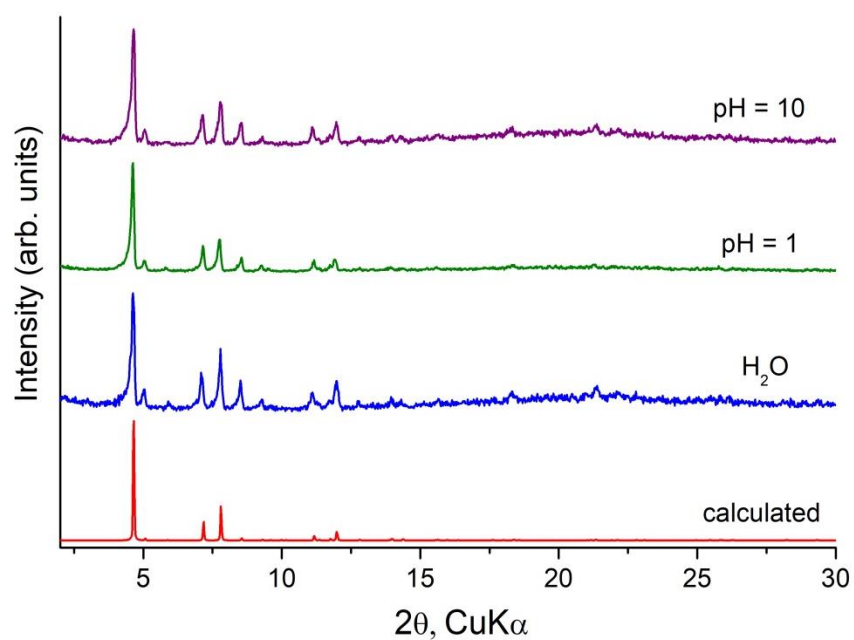

**Figure S17.** Experimental PXRD pattern of Zr-**flu**- $\text{SO}_2$  treated with  $\text{H}_2\text{O}$  (blue), in pH 1 (green) and in pH 10 (purple), along with the corresponding calculated pattern from the single crystal structure (red).



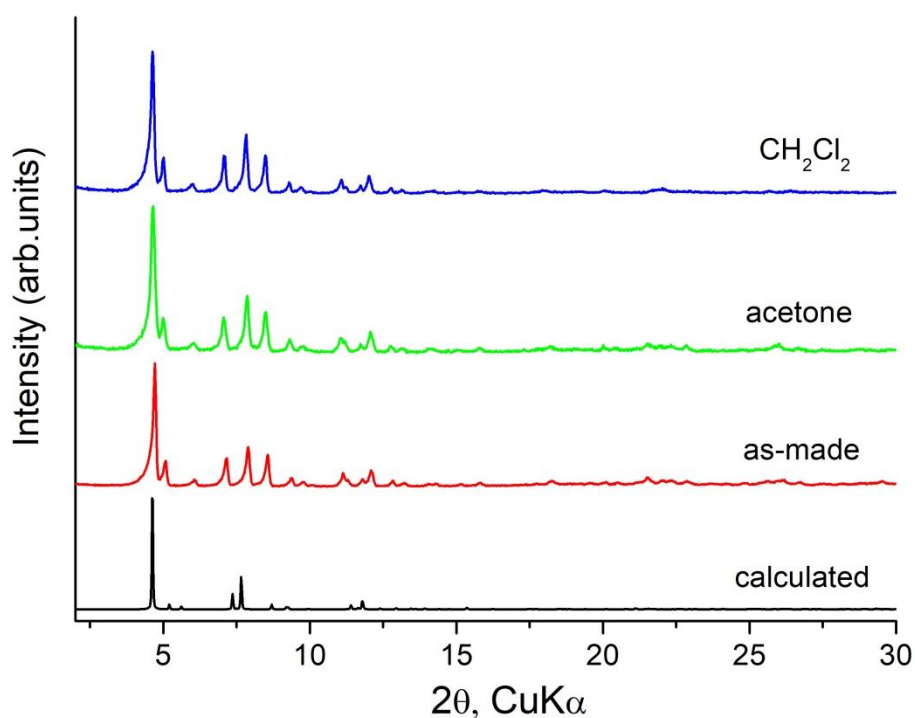

**Figure S18.** Experimental PXRD pattern of as-made Hf-**flu**- $\text{SO}_2$  (red), along with the calculated pattern from the corresponding single crystal structure (black). PXRD pattern of Hf-**flu**- $\text{SO}_2$  after exchange with dichloromethane (green), acetonitrile (dark blue) and acetone (light blue).

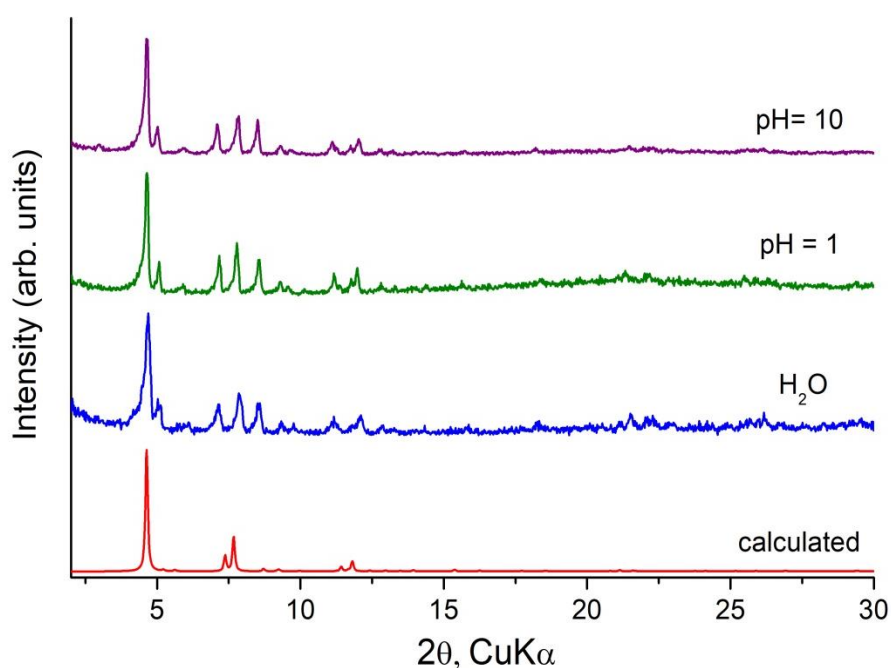

**Figure S19.** Experimental PXRD pattern of Hf-**flu**- $\text{SO}_2$  treated with  $\text{H}_2\text{O}$  (blue), in pH 1 (green) and in pH 10 (purple), along with the corresponding calculated pattern from the single crystal structure (red).

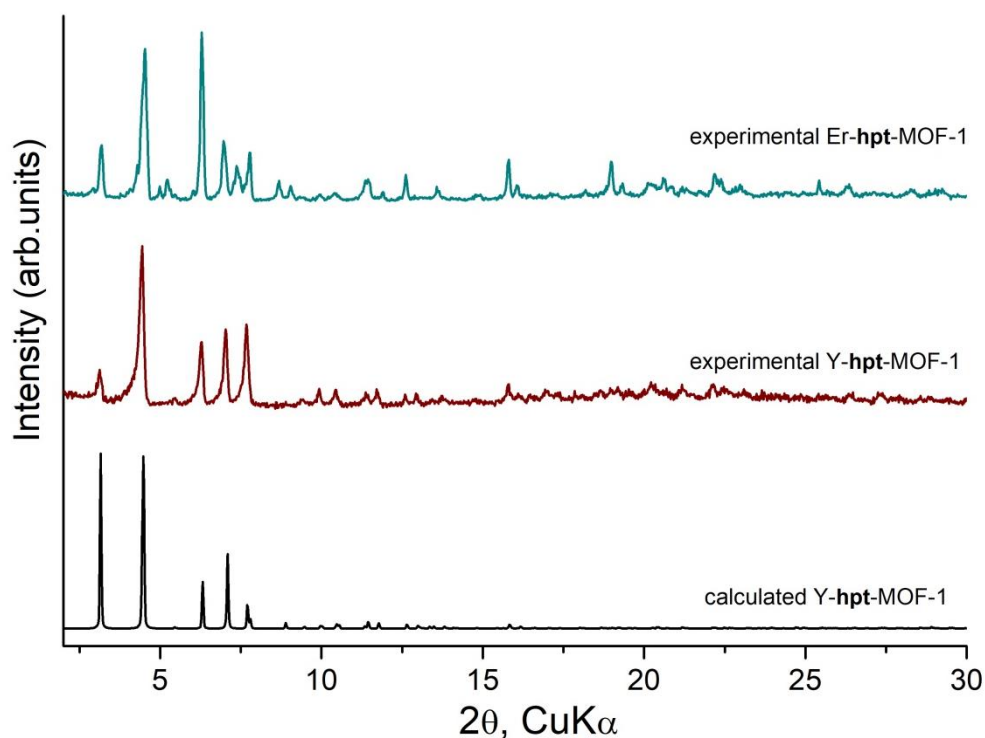

**Figure S20.** Experimental PXRD pattern of as-made Y-hpt-MOF-1 and Er-hpt-MOF-1 along with the calculated pattern from the single crystal structure of Y-hpt-MOF-1.

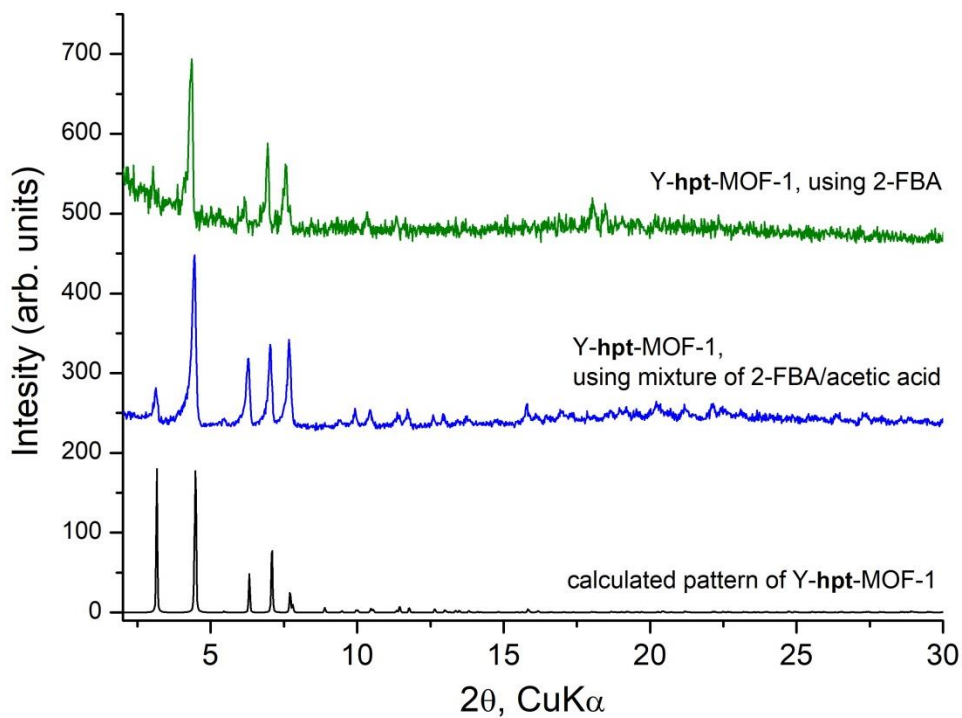

**Figure S21.** Experimental PXRD pattern of Y-hpt-MOF-1 synthesized using only 2-FBA as modulator (green line) along with the pattern obtained from the solid synthesized in a mixture of 2FBA/acetic acid (blue line) and the calculated pattern from the single crystal structure (black line).



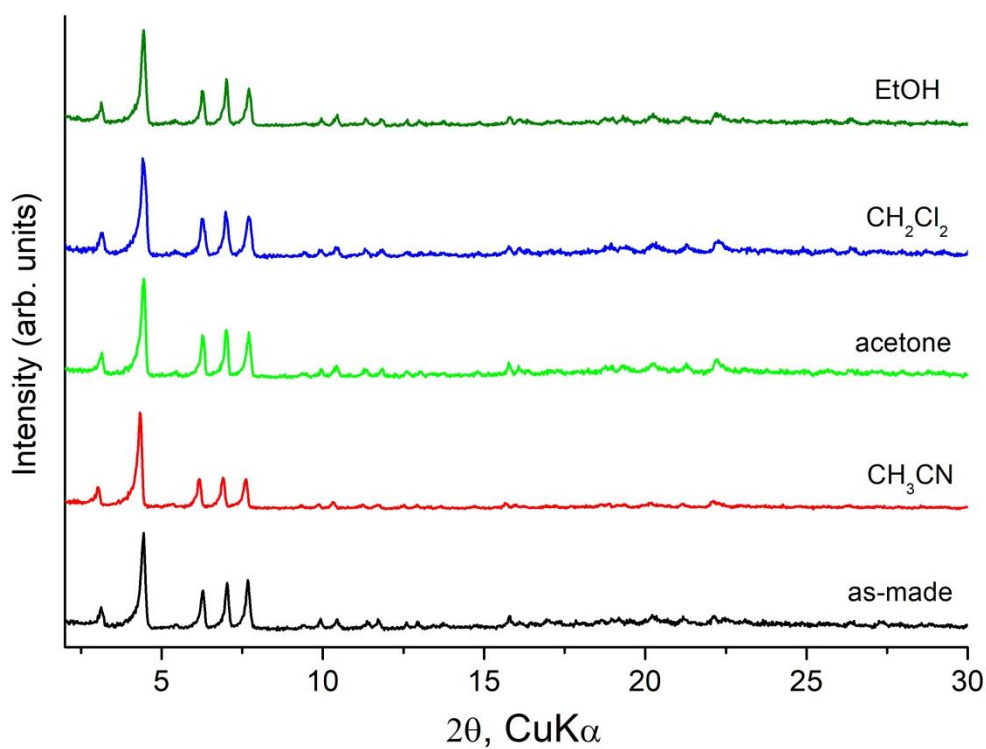

**Figure S22.** PXRD pattern of Y-hpt-MOF-1 after exchange with different solvents.

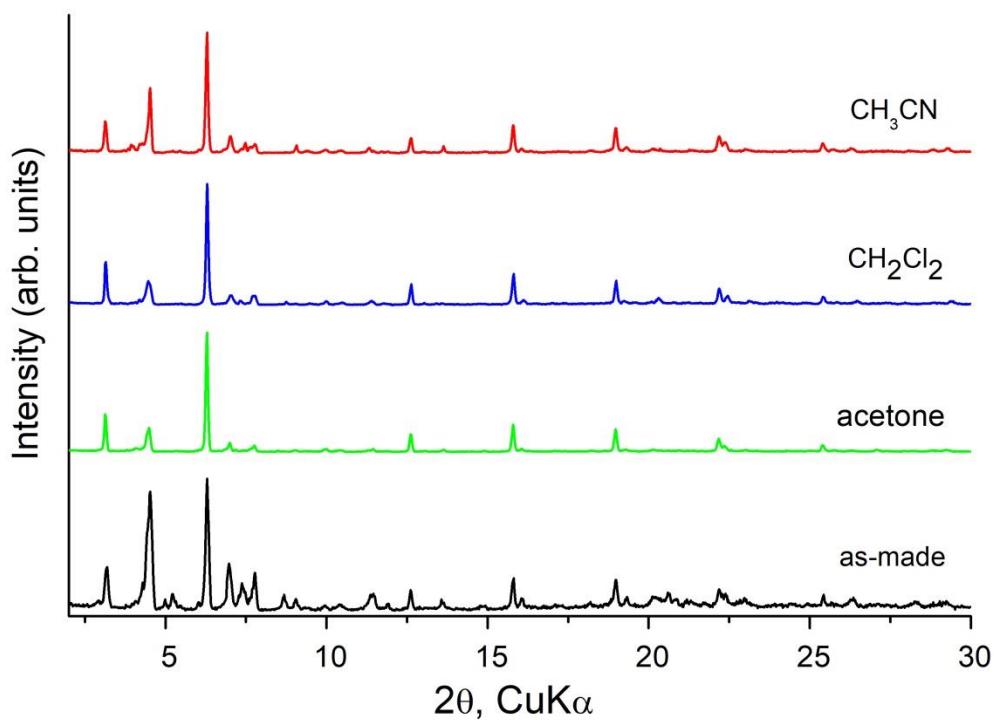

**Figure S23.** PXRD pattern of Er-hpt-MOF-1 after exchange with different solvents.

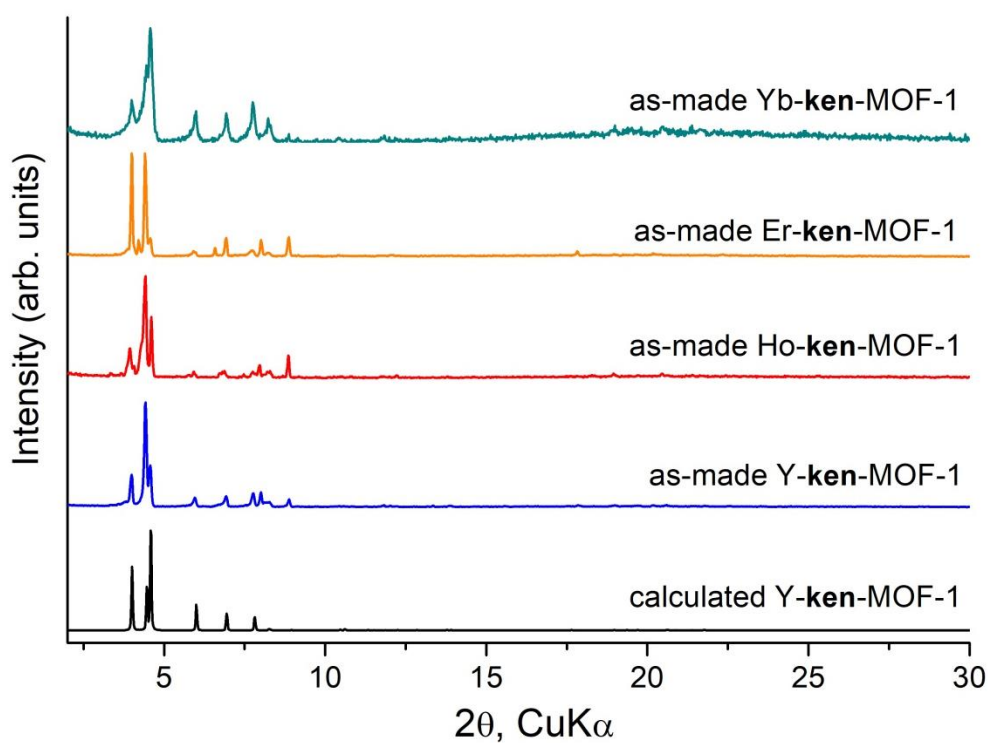

**Figure S24.** Experimental PXRD pattern of the as-made RE-ken-MOF-1 solids (RE:  $\text{Y}^{3+}$ ,  $\text{Ho}^{3+}$ ,  $\text{Er}^{3+}$ ,  $\text{Yb}^{3+}$ ) along with the calculated pattern from the single crystal structure of Y-ken-MOF-1.

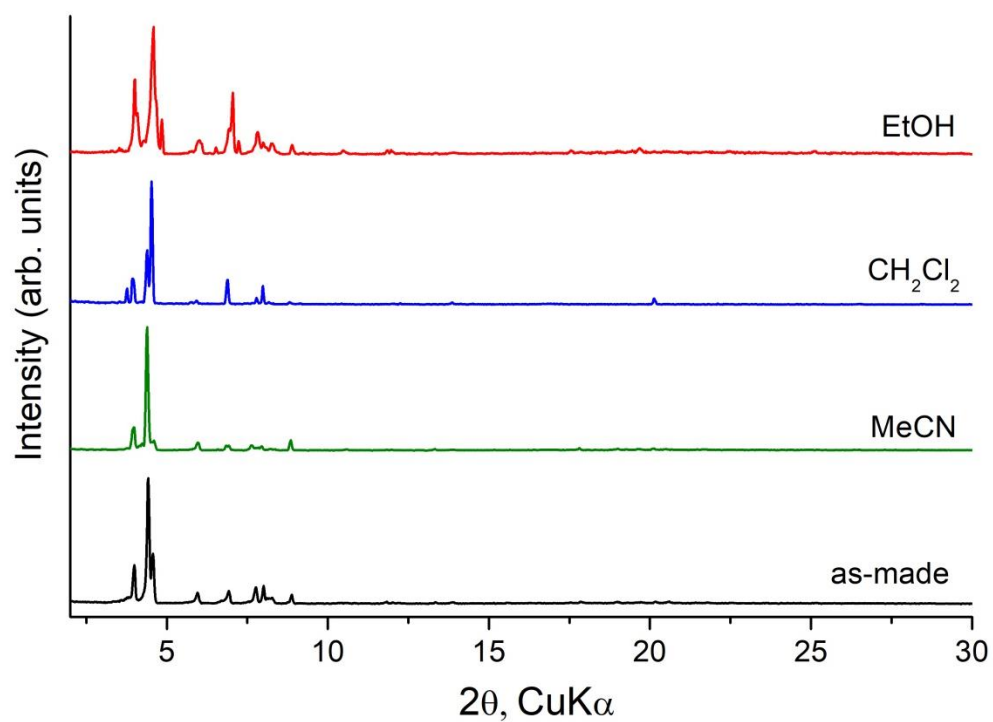

**Figure S25.** PXRD pattern of Y-ken-MOF-1 after exchange with different solvents.

## Energy Dispersive Spectroscopy (EDS)

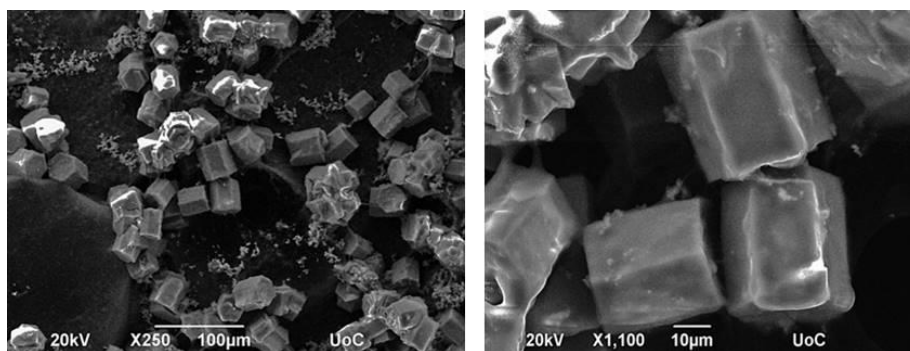

**Figure S26.** SEM images of a  $\text{NaNO}_3$  treated Yb-ken-MOF-1.

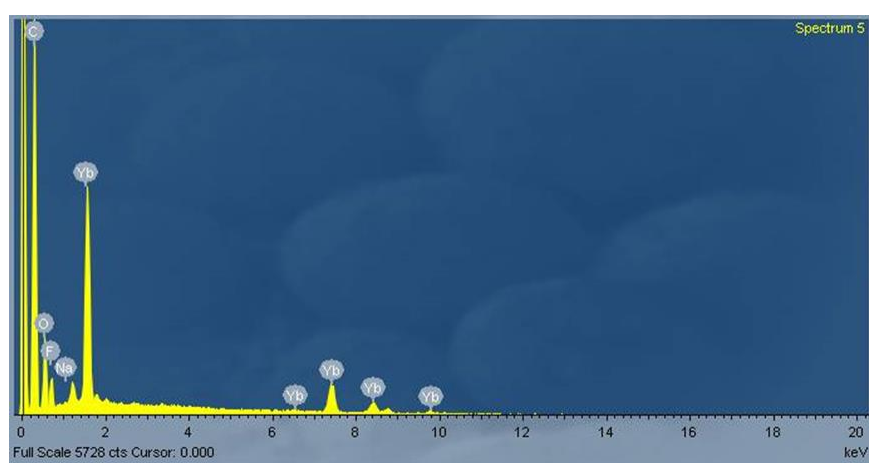

**Figure S27.** EDS spectrum of  $\text{NaNO}_3$  treated Yb-ken-MOF-1.

**Table S8.** EDS quantitative analysis results for Yb-ken-MOF-1.

| Element | Atomic% |
|---------|---------|
| C K     | 74.30   |
| O K     | 17.77   |
| F K     | 6.42    |
| Na K    | -0.02   |
| Yb L    | 1.53    |

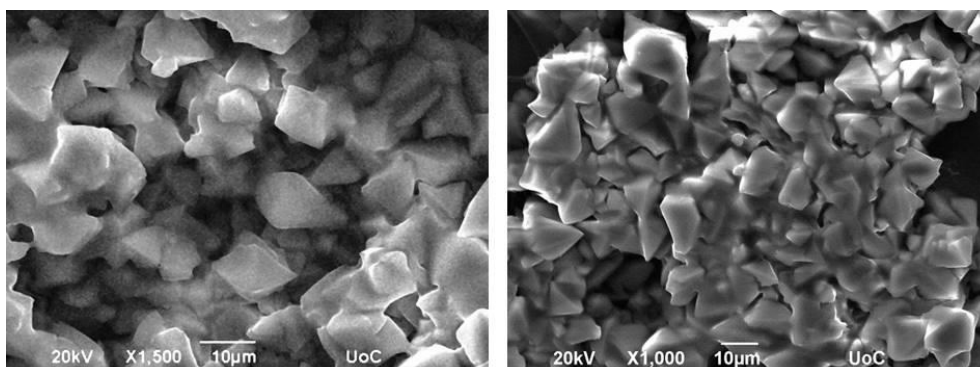

**Figure S28.** SEM images of  $\text{NaNO}_3$  treated Er-hpt-MOF-1.

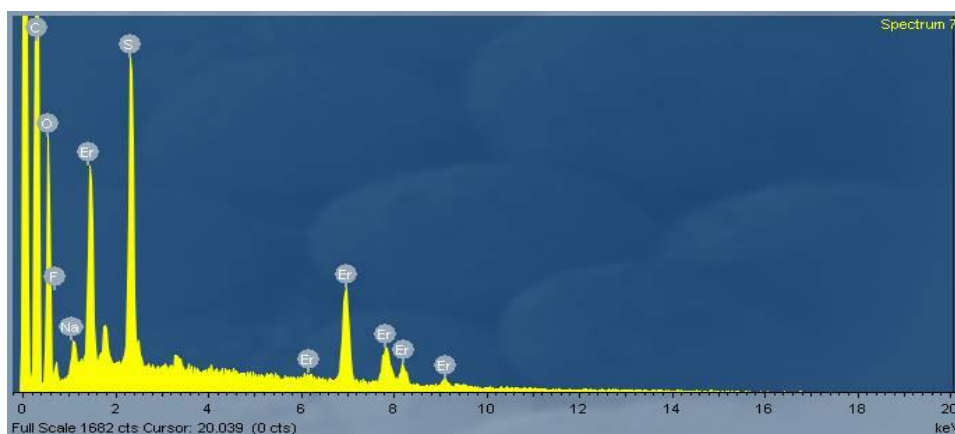

**Figure S29.** EDS spectrum of NaNO<sub>3</sub> treated Er-hpt-MOF-1.

**Table S9.** EDS quantitative analysis results for Er-hpt-MOF-1.

| Element | Atomic%     |
|---------|-------------|
| C K     | 71.31       |
| O K     | 22.91       |
| F K     | 1.43        |
| Na K    | <b>0.40</b> |
| S K     | <b>2.68</b> |
| Er L    | <b>1.26</b> |

## Gas sorption measurements and analysis

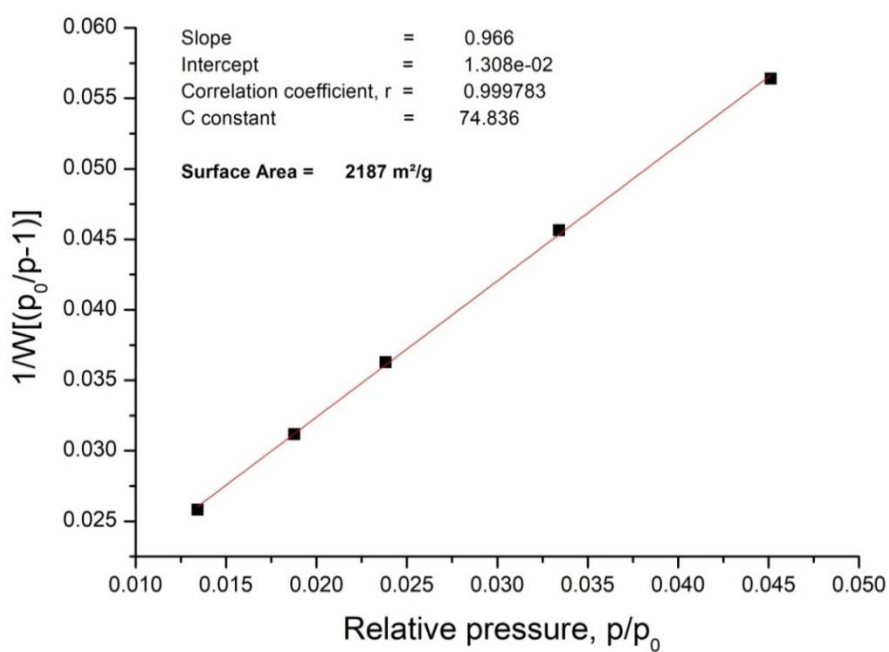

**Figure S30.** BET plot for Zr-flu-SO<sub>2</sub> calculated from the corresponding Ar adsorption isotherm at 87 K.

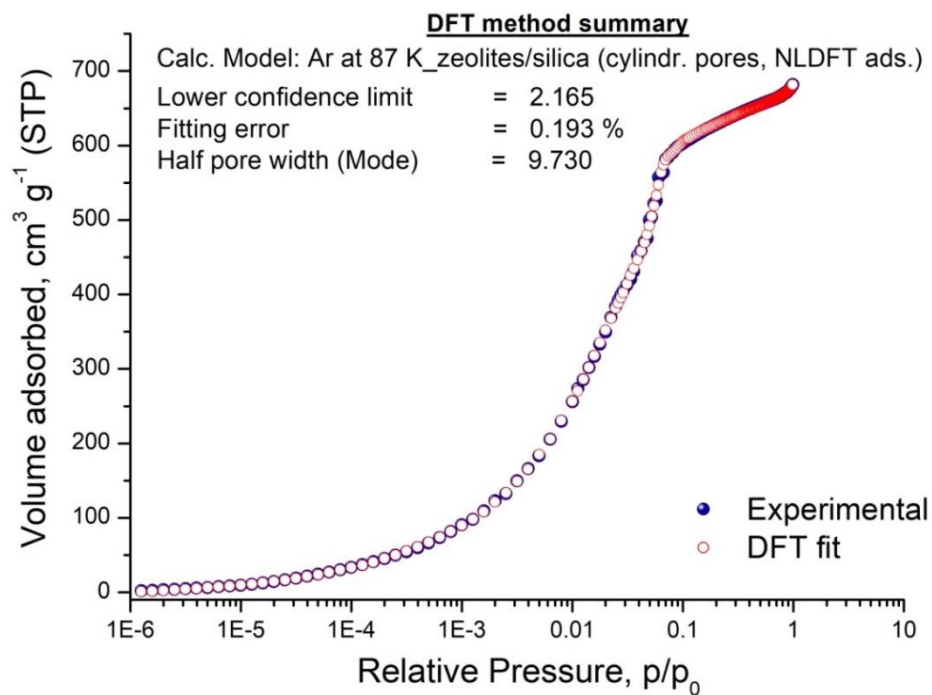

**Figure S31.** Argon adsorption isotherm of Zr-**flu**-SO<sub>2</sub> at 87 K in logarithmic scale and the corresponding NLDFT fitting.

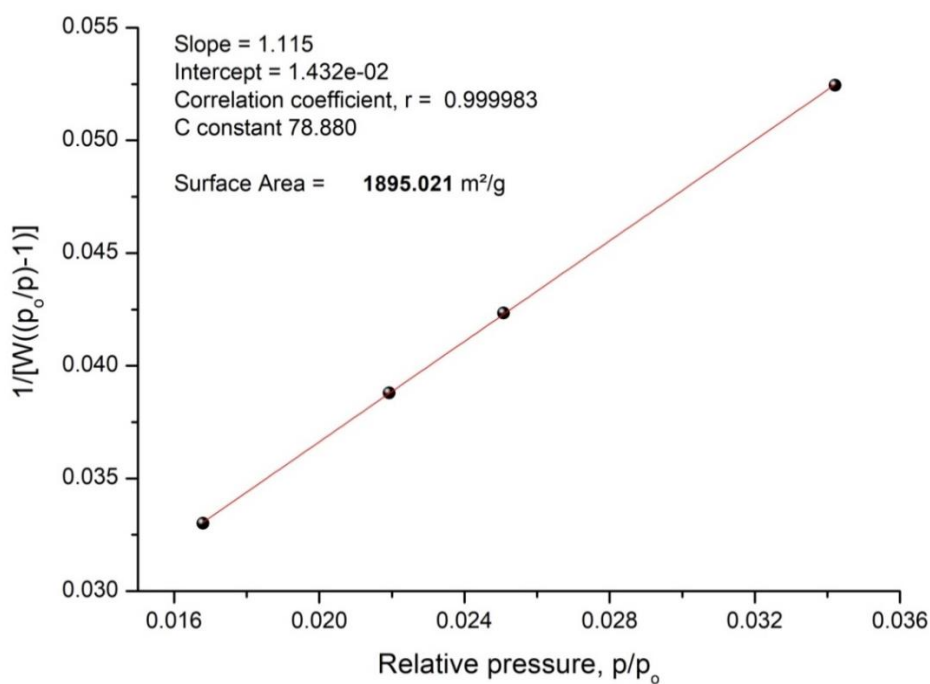

**Figure S32.** BET plot for Hf-**flu**-SO<sub>2</sub> calculated from the corresponding Ar adsorption isotherm at 87K.

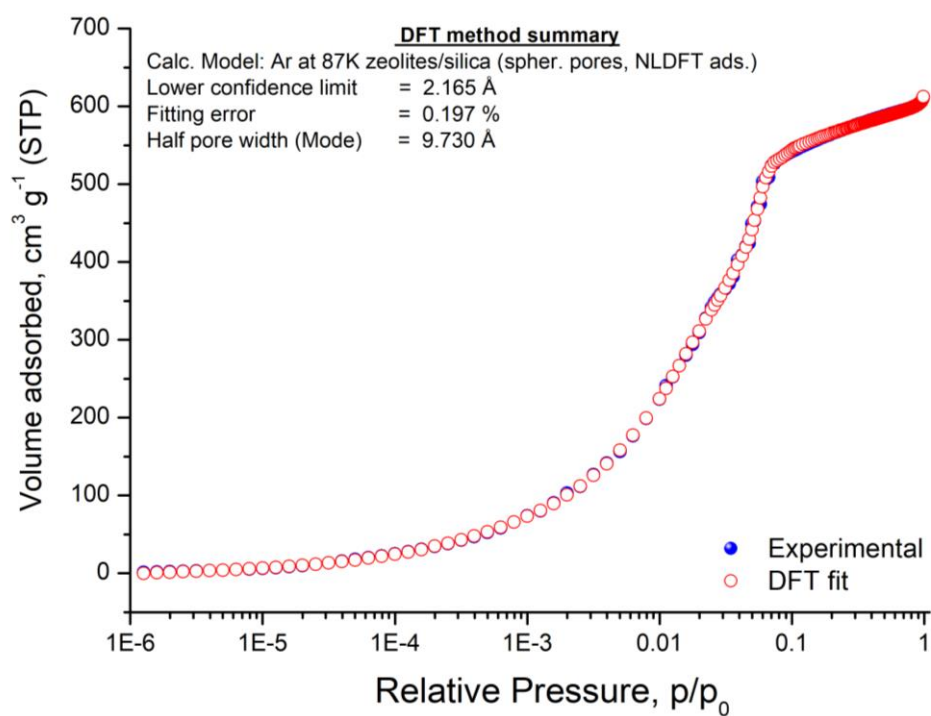

**Figure S33.** Argon adsorption isotherm of Hf-flu-SO<sub>2</sub> at 87 K in logarithmic scale and the corresponding NLDFT fitting.

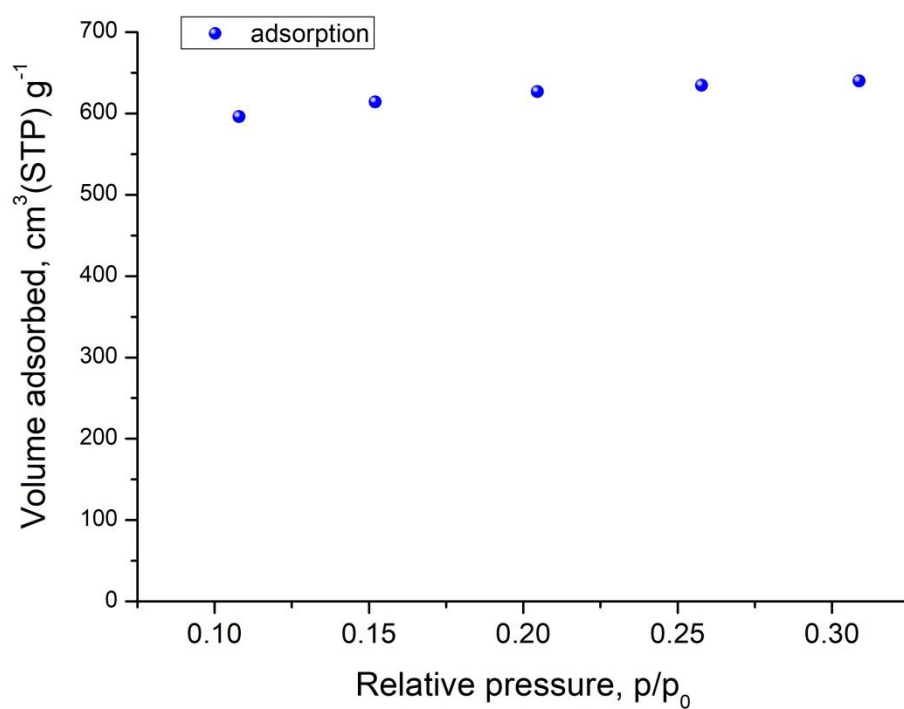

**Figure S34.** Five point N<sub>2</sub> isotherm of PCN-521 recorded at 77 K.

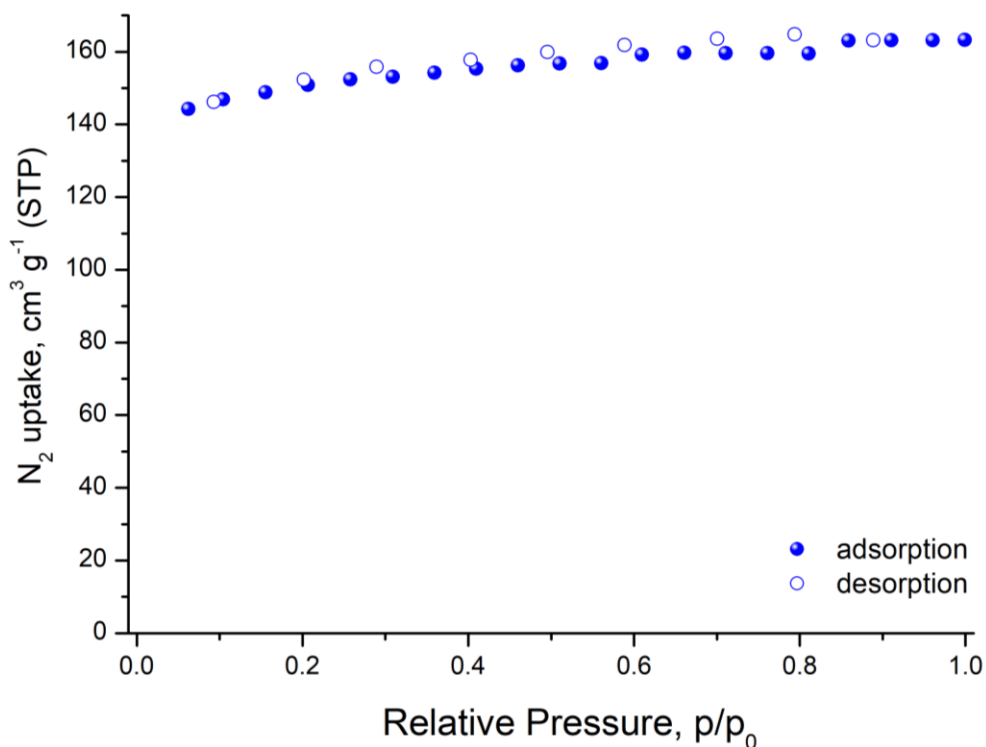

**Figure S35.** Nitrogen sorption isotherm of the Y-hpt-MOF-1 recorded at 77 K.

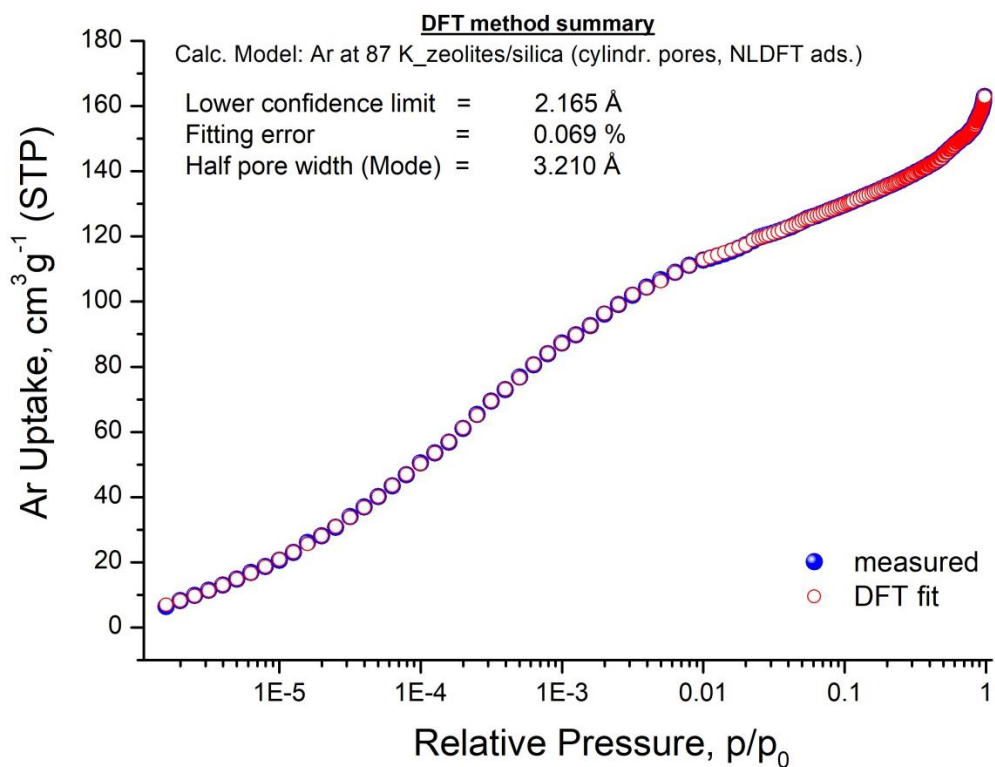

**Figure S36.** Argon sorption isotherm of the Y-hpt-MOF-1 recorded at 87 K in logarithmic scale and the corresponding NLDFT fitting.



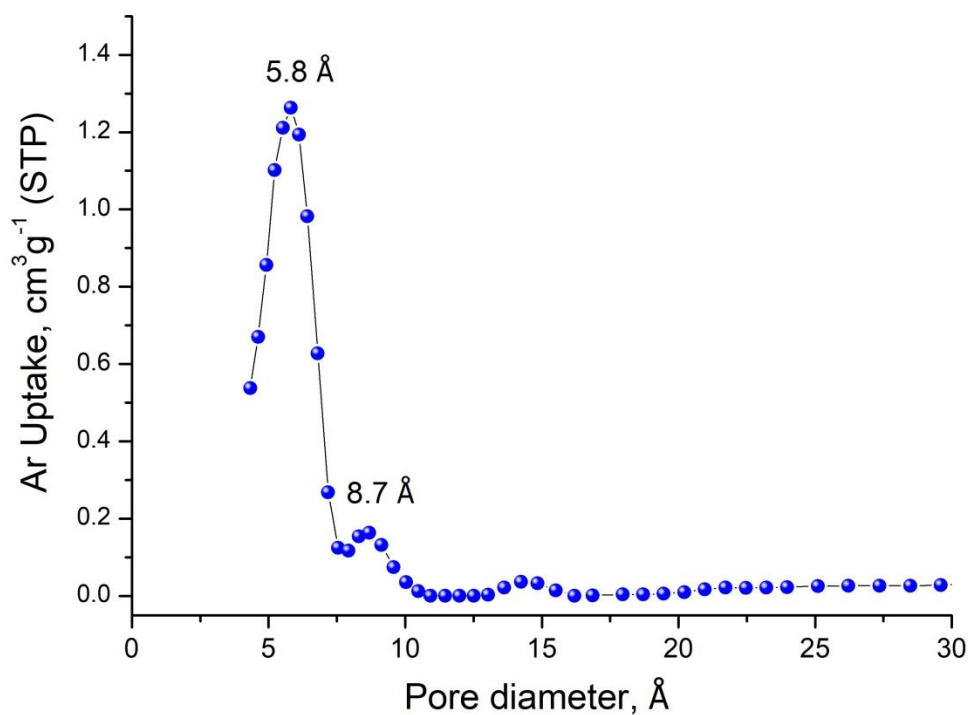

**Figure S37.** Pore size distribution obtained by NLDFT method for Y-**hpt**-MOF-1.

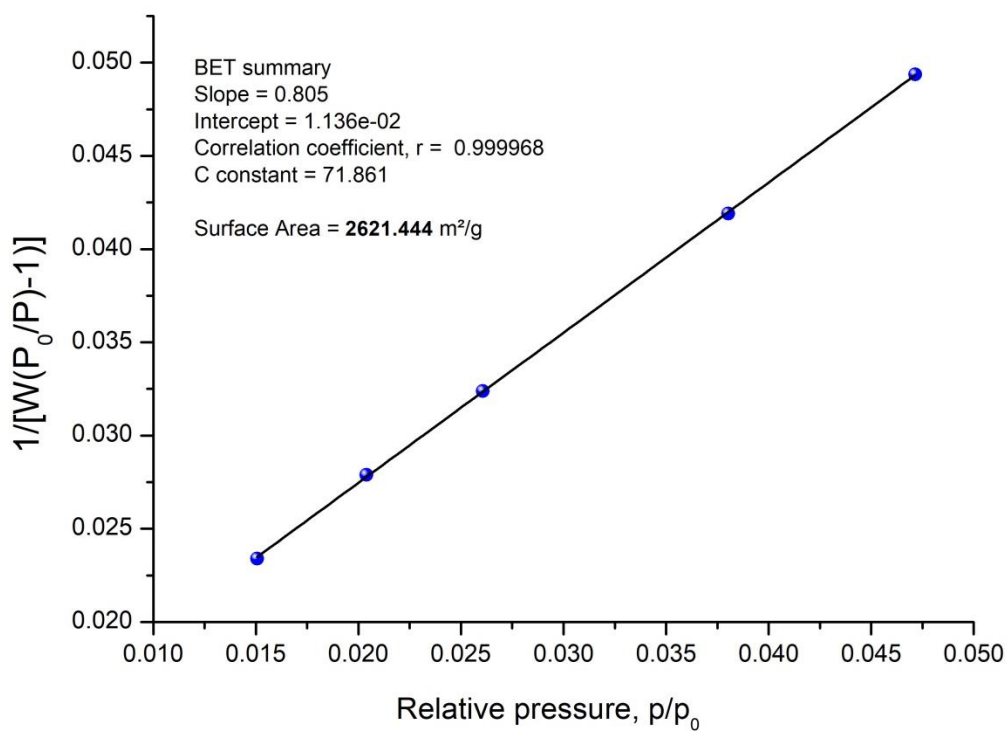

**Figure S38.** BET plot for Y-**ken**-MOF-1 from the Ar adsorption isotherm at 87 K.



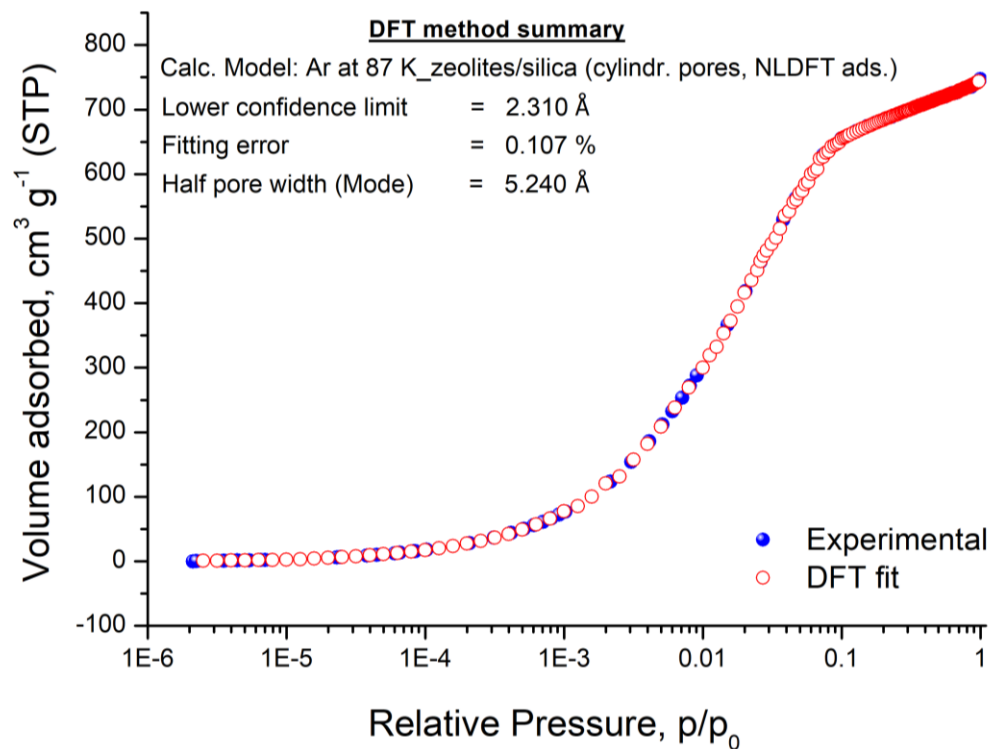

**Figure S39.** Argon adsorption isotherm of Y-ken-MOF-1 at 87K in logarithmic scale and the corresponding NLDFT fitting.

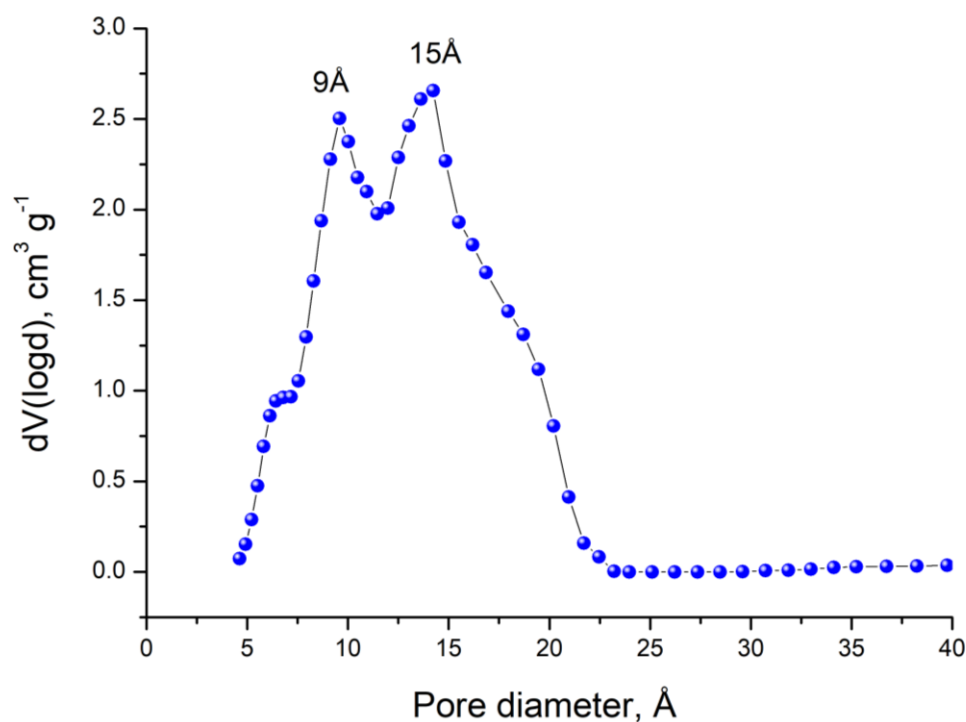

**Figure S40.** Pore size distribution obtained by NLDFT method for Y-ken-MOF-1.

**Table S10.** Porosity data of representative highly porous RE-based MOFs.

| Material                                           | Gas uptake<br>(cm <sup>3</sup> g <sup>-1</sup> ) | BET area<br>(m <sup>2</sup> g <sup>-1</sup> ) | Exp. total pore<br>volume<br>(cm <sup>3</sup> g <sup>-1</sup> ) | Calc. total<br>pore volume<br>(cm <sup>3</sup> g <sup>-1</sup> ) | Reference      |
|----------------------------------------------------|--------------------------------------------------|-----------------------------------------------|-----------------------------------------------------------------|------------------------------------------------------------------|----------------|
| Y- <b>ftw</b> -MOF-2                               | 1000 <sup>c</sup>                                | 3690                                          | 1.26                                                            | 1.26                                                             | 37             |
| Y- <b>ftw</b> -MOF(Naph)                           | 800 <sup>c</sup>                                 | 3040                                          | 1.05                                                            | 1.11                                                             | 37             |
| Y- <b>ken</b> -MOF-1                               | 747                                              | <b>2621</b>                                   | 0.95                                                            | 1.86                                                             | This work      |
| Y-FTZBP                                            | 750                                              | 2410                                          | 0.94                                                            | 1.03                                                             | 31             |
| Y- <b>shp</b> -MOF-1                               | 620                                              | 2200                                          | 0.79                                                            | 0.9                                                              | 34             |
| Y- <b>ftw</b> -MOF-2 (Anthr)                       | 600 <sup>c</sup>                                 | 2100                                          | 0.79                                                            | 1.05                                                             | 37             |
| Eu-SPFF <sup>b</sup>                               | 514                                              | 1891                                          | 0.79                                                            |                                                                  | S <sup>3</sup> |
| Tb- <b>urx</b> -MOF-1                              | 500                                              | 1590                                          | 0.66                                                            | 0.82                                                             | 33             |
| Y- <b>kex</b> -MOF-1 <sup>b</sup>                  | 542                                              | 1580                                          | 0.84                                                            | 1.23                                                             | 33             |
| Y- <b>shp</b> -MOF-5                               | 450 <sup>c</sup>                                 | 1550                                          | 0.63                                                            | 0.61                                                             | 35             |
| Y- <b>gea</b> -MOF-1                               | 450 <sup>c</sup>                                 | 1490                                          | 0.58                                                            | 0.71                                                             | S <sup>4</sup> |
| Y- <b>pek</b> -MOF-1                               | 460 <sup>c</sup>                                 | 1330                                          | 0.47                                                            | 0.47                                                             | 36             |
| Y- <b>aea</b> -MOF                                 | 360 <sup>c</sup>                                 | -                                             | -                                                               | -                                                                | 36             |
| Y- <b>alb</b> -MOF-1                               | 360                                              | -                                             | 0.52                                                            | 0.63                                                             | 34             |
| Yb-DPPY <sup>b</sup>                               | 200 <sup>c</sup>                                 | 1226                                          | 0.49                                                            | 0.57                                                             | S <sup>5</sup> |
| PCN-905-SO <sub>2</sub> -BDC <sup>b</sup>          | 330                                              | 916                                           | -                                                               | -                                                                | 20             |
| Y-csq-MOF-1                                        | 296                                              | 874                                           | 0.37                                                            | 0.63                                                             | 41             |
| PCN-906-O <sup>b</sup>                             | 250                                              | 830                                           | -                                                               | -                                                                | 20             |
| PCN-912(Eu)-<br>CH <sub>3</sub> (50%) <sup>b</sup> | 292                                              | 829                                           | 0.55                                                            | 0.68                                                             | 24             |
| Tb-UTSA-61 <sup>b</sup>                            | 450                                              | 770                                           | 0.67                                                            | 1.66                                                             | S <sup>6</sup> |
| Yb-DDIA <sup>b</sup>                               | 300 <sup>c</sup>                                 | 759                                           | 0.3                                                             | 0.49                                                             | S <sup>5</sup> |
| Y- <b>kce</b> -MOF-1 <sup>b</sup>                  | 244                                              | 720                                           | 0.37                                                            | 1.42                                                             | 33             |
| PCN-918(Eu) <sup>b</sup>                           | 225                                              | 673                                           | 0.38                                                            | 0.49                                                             | 24             |
| PCN-918(Tb) <sup>b</sup>                           | 221                                              | 670                                           | 0.36                                                            | -                                                                | 24             |
| PCN-909(Eu)-Cl <sup>b</sup>                        | 232                                              | 661                                           | 0.54                                                            | 0.88                                                             | 24             |
| PCN-905-SO <sub>2</sub> <sup>b</sup>               | 216                                              | 633                                           | -                                                               | -                                                                | 20             |
| PCN-909(Tb)-NH <sub>2</sub> <sup>b</sup>           | 220                                              | 608                                           | 0.5                                                             | 0.57                                                             | 24             |
| PCN-918(Tb)-OCH <sub>3</sub> <sup>b</sup>          | 208                                              | 602                                           | 0.33                                                            | -                                                                | 24             |
| Y- <b>hpt</b> -MOF <sup>b</sup>                    | 163                                              | 526                                           | 0.24                                                            | 1.12                                                             | This work      |

<sup>a</sup> Ar sorption isotherm at 87 K. <sup>b</sup> N<sub>2</sub> sorption isotherm at 77 K. <sup>c</sup> Estimated from the reported isotherm.

## Low pressure CO<sub>2</sub>, CH<sub>4</sub> and Xe sorption isotherms, determination of heat of adsorption and CO<sub>2</sub>/CH<sub>4</sub> selectivity calculations using IAST.

**Heat of adsorption.** To calculate heats of adsorptions, the corresponding adsorption isotherms at two or three different temperatures were simultaneously fitted using the virial type<sup>7,8</sup> Equation 1:

$$\ln P = \ln N + \frac{1}{T} \sum_{i=0}^m a_i N^i + \sum_{i=0}^n b_i N^i \quad (1)$$

The heat of adsorption at zero coverage was calculated from Equation 2, where as a function of surface coverage, from Equation 3:

$$Q_{st} = -Ra_o \quad (2)$$

$$Q_{st}(N) = -R \sum_{i=0}^m a_i N^i \quad (3)$$

For the determination of the isosteric heat of adsorption using the Clausius Clapeyron equation a commercially available software, ASiQwin (version 3.01) purchased from Quantachrome, was used.

**Gas Selectivity using the IAST model.** The corresponding calculations were performed according to an established procedure.<sup>9-11</sup> Specifically, the single-component adsorption isotherms were described by fitting the data with the following virial-type equation

$$p = \frac{n}{K} \exp(c_1 n + c_2 n^2 + c_3 n^3 + c_4 n^4) \quad (4)$$

where  $p$  is the pressure in Torr,  $n$  is the adsorbed amount in mmol g<sup>-1</sup>,  $K$  is the Henry constant in mmol g<sup>-1</sup> Torr<sup>-1</sup> and  $c_i$  are the constants of the virial equation.

The free energy of desorption at a given temperature and pressure of the gas is obtained from the analytical integration of eq. (4):

$$G(T, p) = RT \int_0^p \frac{n}{p} dp = RT \left( n + \frac{1}{2} c_1 n^2 + \frac{2}{3} c_2 n^3 + \frac{3}{4} c_3 n^4 + \frac{4}{5} c_4 n^5 \right) \quad (5)$$

The free energy of desorption is a function of temperature and pressure  $G(T, p)$  and describes the minimum work (Gibbs free energy) that required to completely degas the adsorbent surface.

For a binary mixture of component  $i$  and  $j$  eq. (5) yields the individual pure loadings  $n_i^0$  and  $n_j^0$  at the same free energy of desorption:

$$G_i^0(n_i^0) = G_j^0(n_j^0) \quad (6)$$

The partial pressure of component  $i$  and  $j$  in an ideal adsorption mixture is given by the following equations:

$$py_i = p_i^0(n_i^0)x_i \quad (7)$$

$$py_j = p_j^0(n_j^0)x_j \quad (8)$$

where  $y_i (=1-y_j)$  and  $x_i (=1-x_j)$  is the molar fraction of component  $i$  in the gas phase and the adsorbed phase respectively and  $p_i^0, p_j^0$  is the pure component pressure of  $i$  and  $j$  respectively. From eq. (6)-(8) and (3), the selectivity for the adsorbates  $i$  and  $j$  ( $S_{i,j}$ ) and the total pressure ( $p$ ) of the gas mixture were calculated from eq. (9) and eq. (10), respectively.

$$S_{ij} = \frac{x_i/y_i}{x_j/y_j} = \frac{p_j^0}{p_i^0} \quad (9)$$

$$p = \sum_i^j (p_i^0 x_i) \quad (10)$$

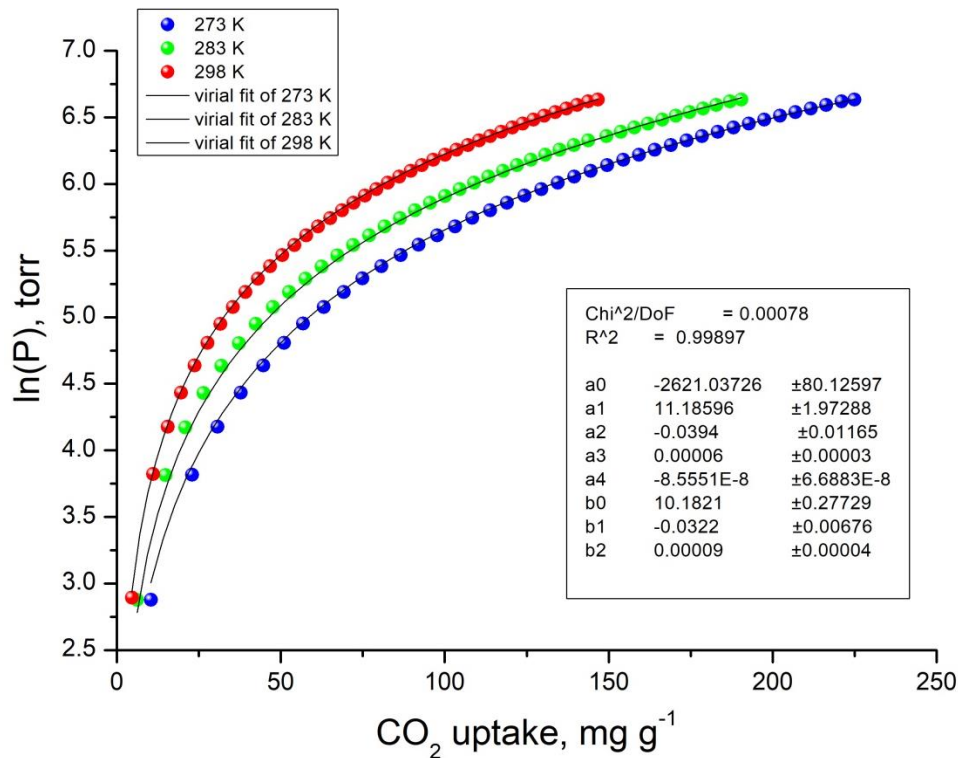

**Figure S41.** Virial type fitting of CO<sub>2</sub> adsorption isotherms of Zr-flu-SO<sub>2</sub> at 273 K, 283 K and 298 K according to equation 1.

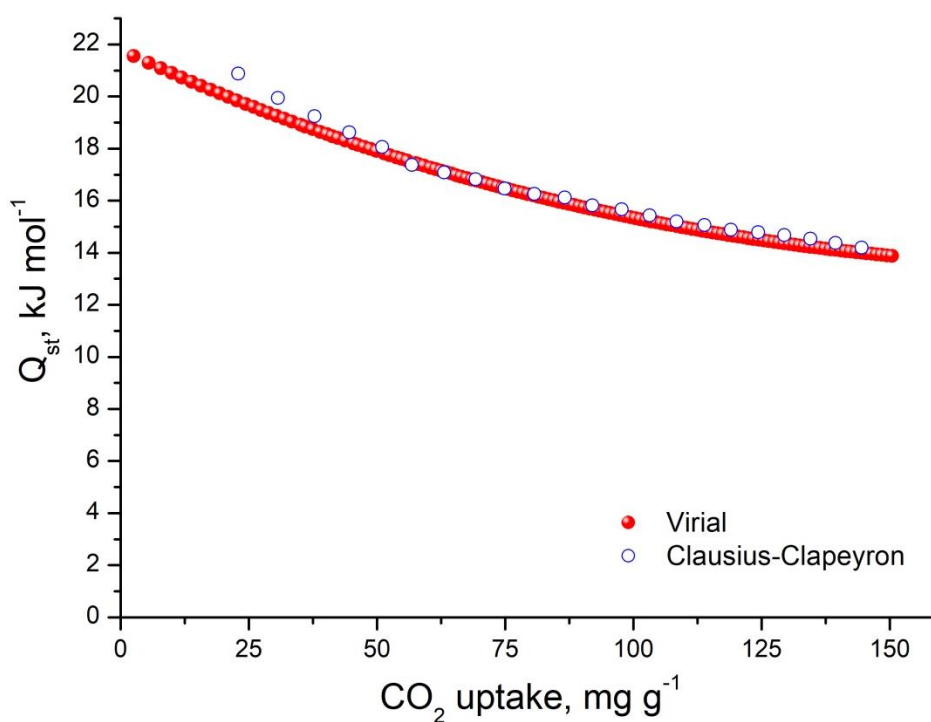

**Figure S42.** CO<sub>2</sub> isosteric heat of adsorption of Zr-**flu**-SO<sub>2</sub> as a function of surface coverage.

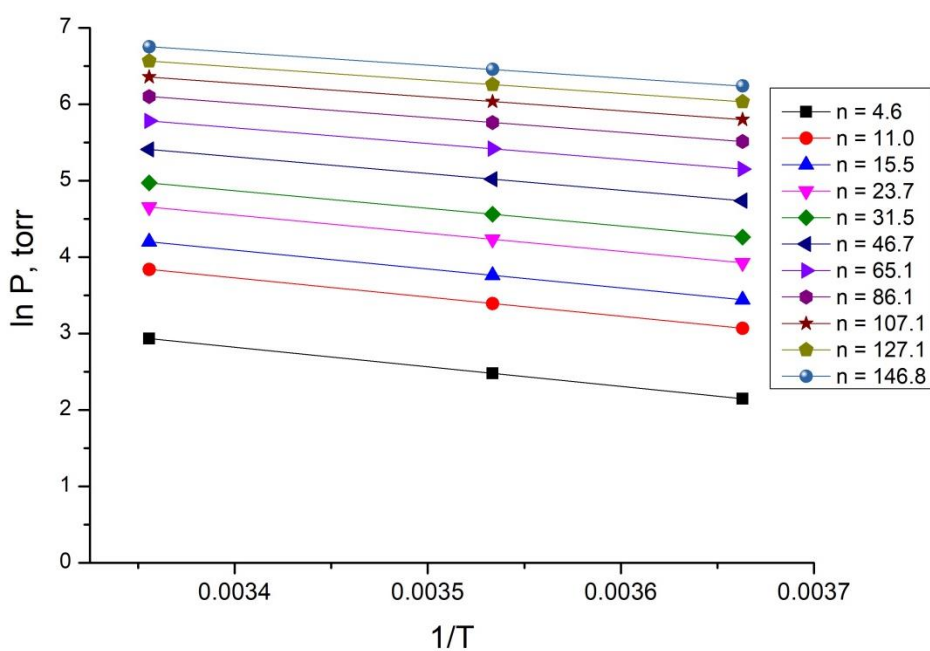

**Figure S43.** Isosteric  $\ln P$  against  $1/T$  plot for 273 K, 283 K and 298 K at different loadings  $n$  (in  $\text{mg g}^{-1}$ ) of CO<sub>2</sub> in Zr-**flu**-SO<sub>2</sub>, confirming the accuracy of the  $Q_{st}$  determined from the virial type analysis, as evidenced by the linearity in the isosters.

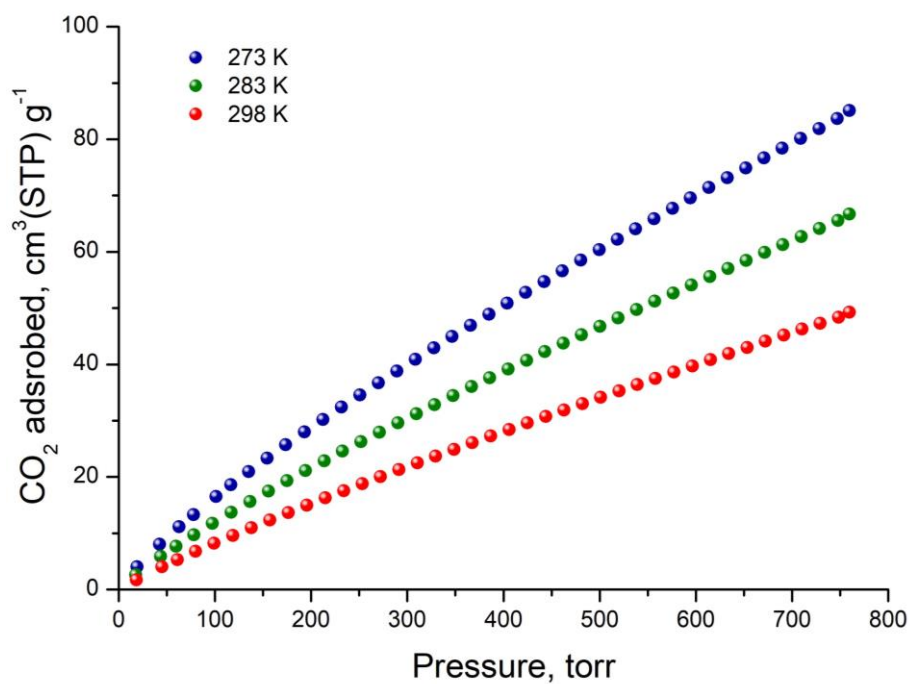

**Figure S44.** CO<sub>2</sub> adsorption isotherms of Hf-**flu**-SO<sub>2</sub> at 273 K, 283 K and 298 K.

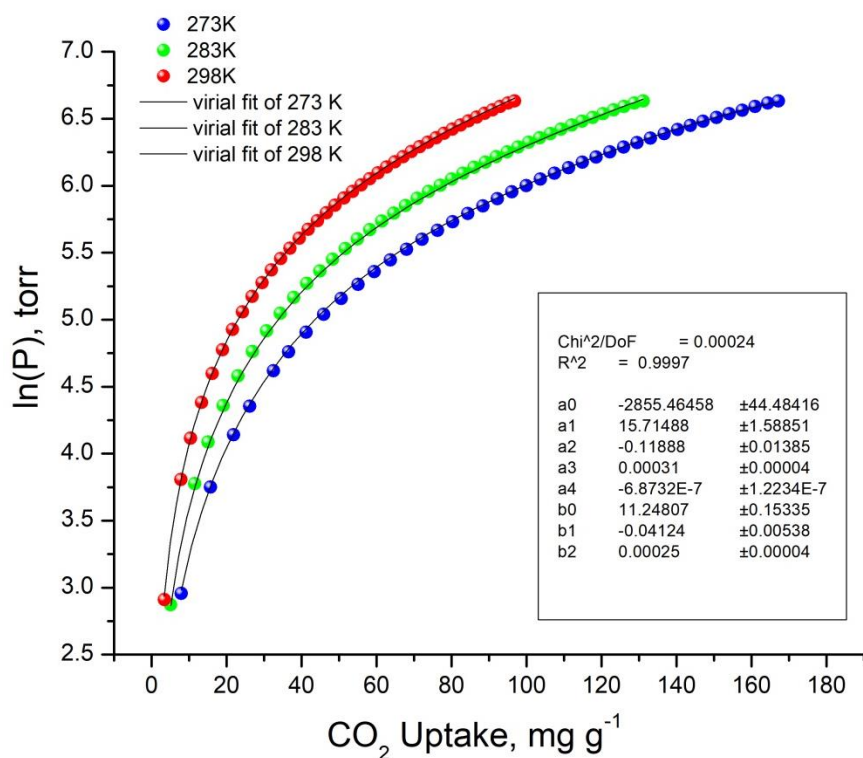

**Figure S45.** Virial type fitting of CO<sub>2</sub> adsorption isotherms of Hf-**flu**-SO<sub>2</sub> at 273 K, 283K and 298 K according to equation 1.

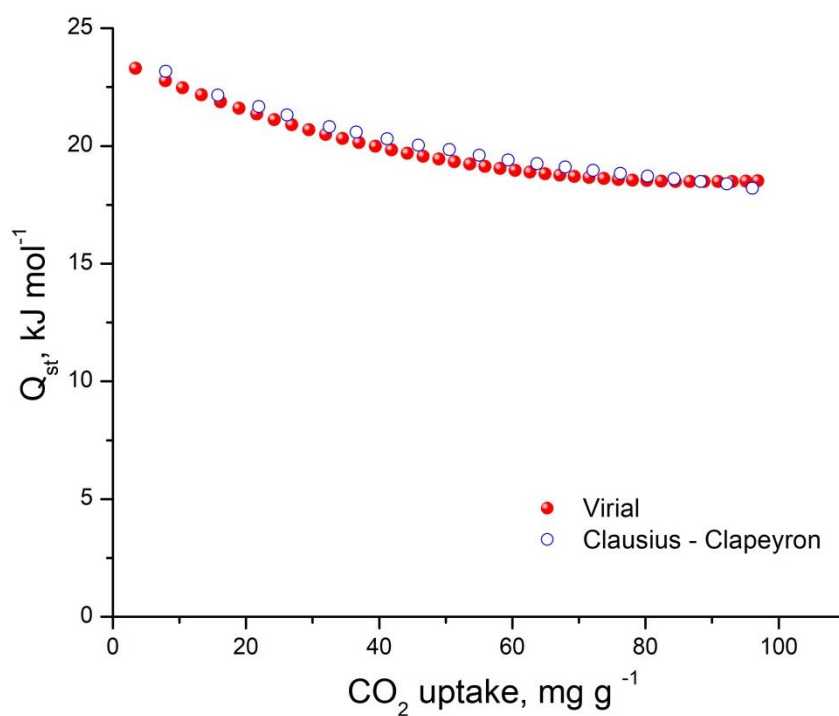

**Figure S46.** CO<sub>2</sub> isosteric heat of adsorption ( $Q_{st}$ ) of Hf-**flu**-SO<sub>2</sub> as a function of surface coverage.

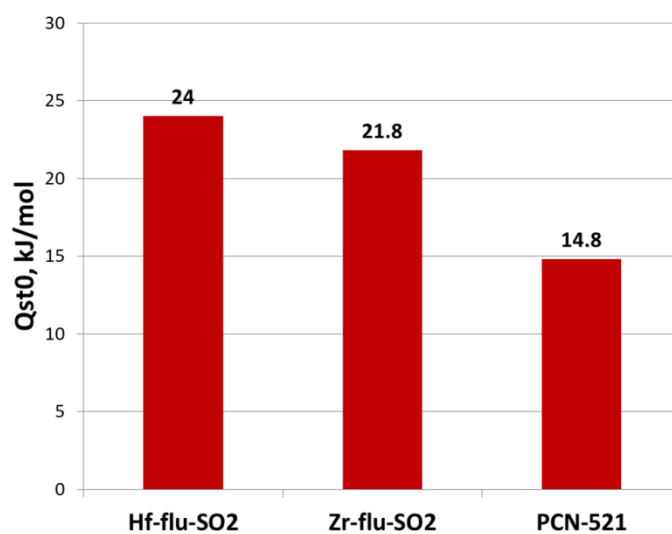

**Figure S47.** CO<sub>2</sub>  $Q_{st}$  values at zero coverage for Zr-**flu**-SO<sub>2</sub>, Hf-**flu**-SO<sub>2</sub> and PCN-521.

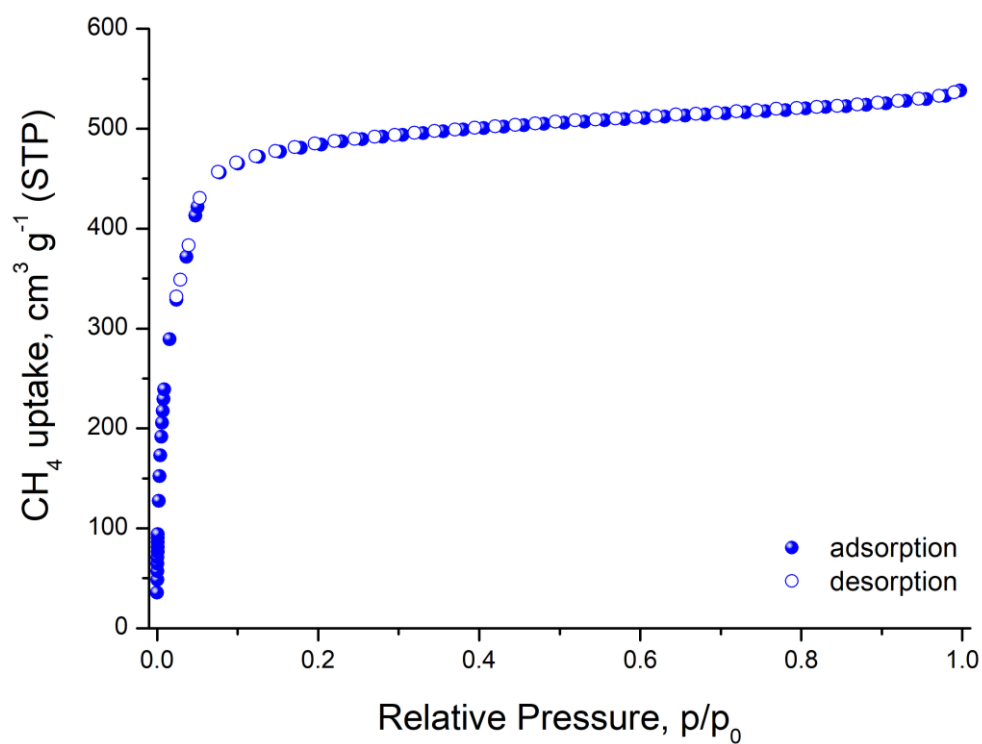

**Figure S48.** CH<sub>4</sub> sorption isotherm of the Zr-**flu**-SO<sub>2</sub> recorded at 112 K.

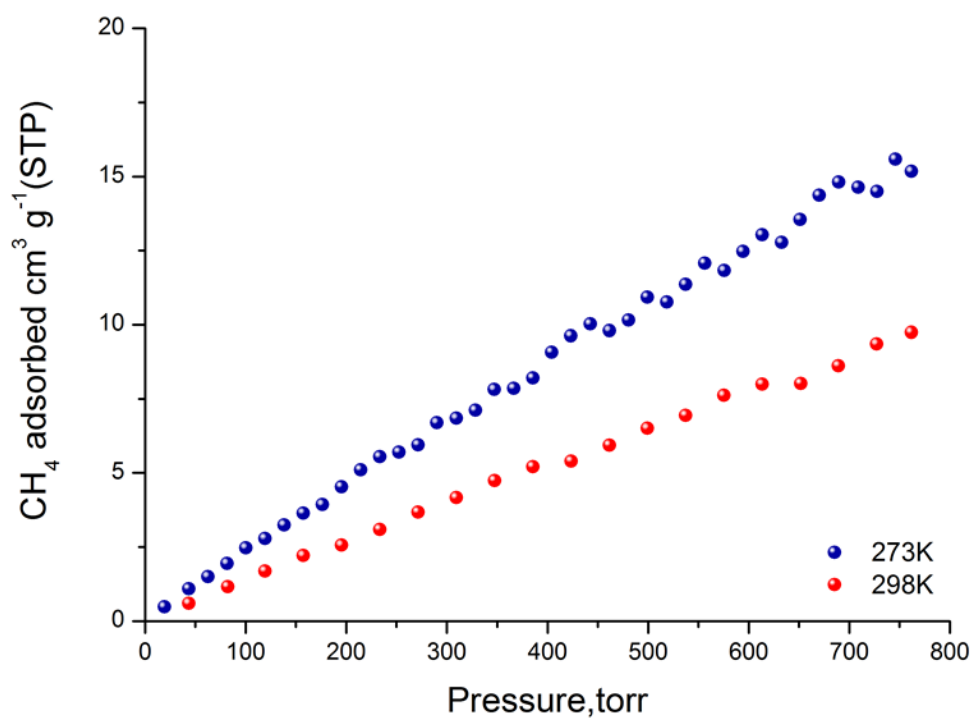

**Figure S49.** CH<sub>4</sub> adsorption isotherms of Zr-**flu**-SO<sub>2</sub> at 273 K and 298 K.



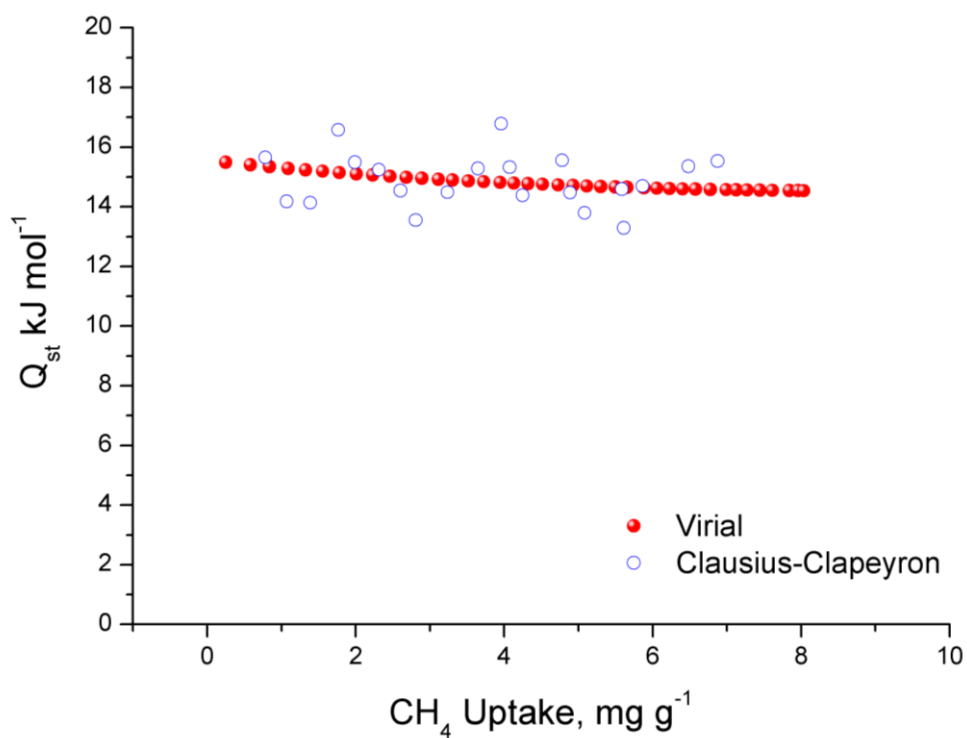

**Figure S50.**  $\text{CH}_4$  isosteric heat of adsorption of Zr-flu-SO<sub>2</sub> as a function of surface coverage.

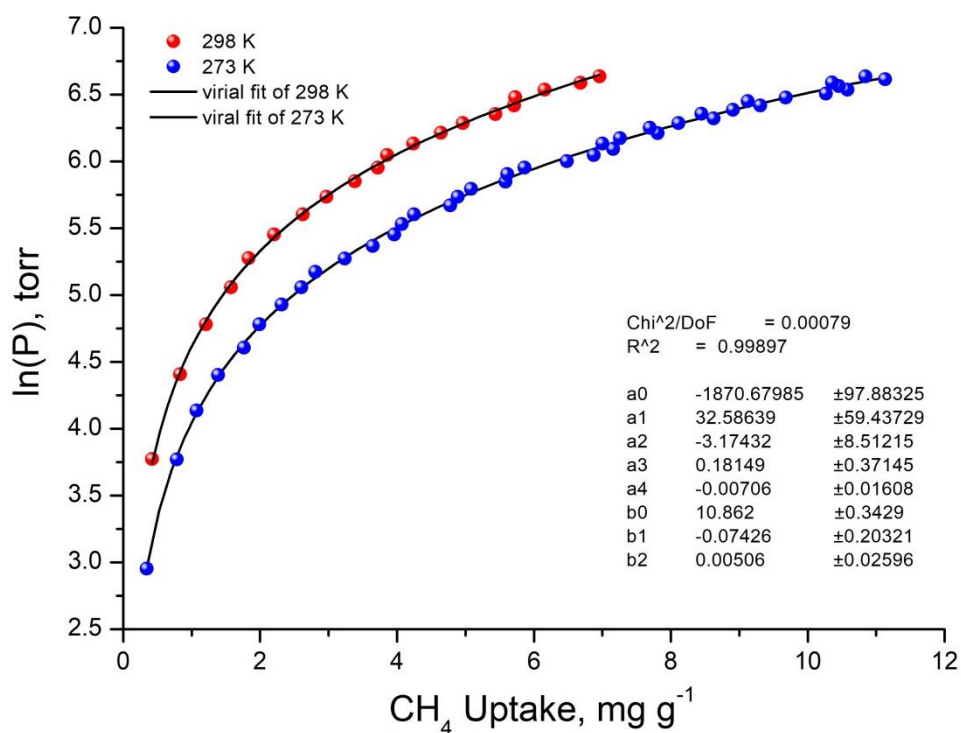

**Figure S51.** Virial type fitting of  $\text{CH}_4$  adsorption isotherms of Zr-flu-SO<sub>2</sub> at 273 K and 298 K according to equation 1.

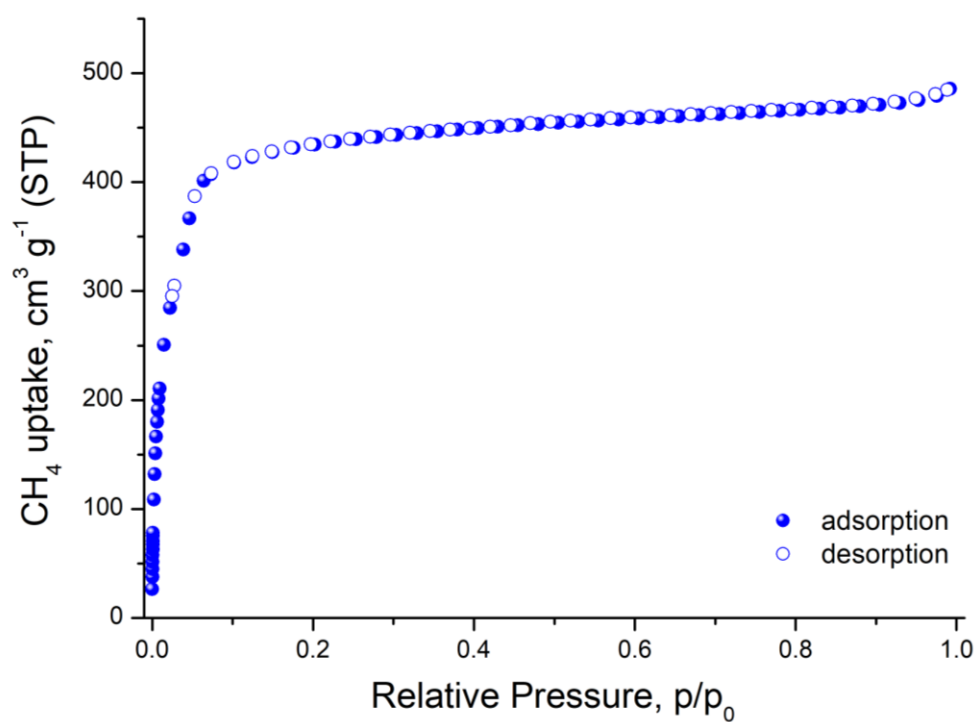

**Figure S52.** CH<sub>4</sub> sorption isotherm of the Hf-**flu**-SO<sub>2</sub> recorded at 112 K.

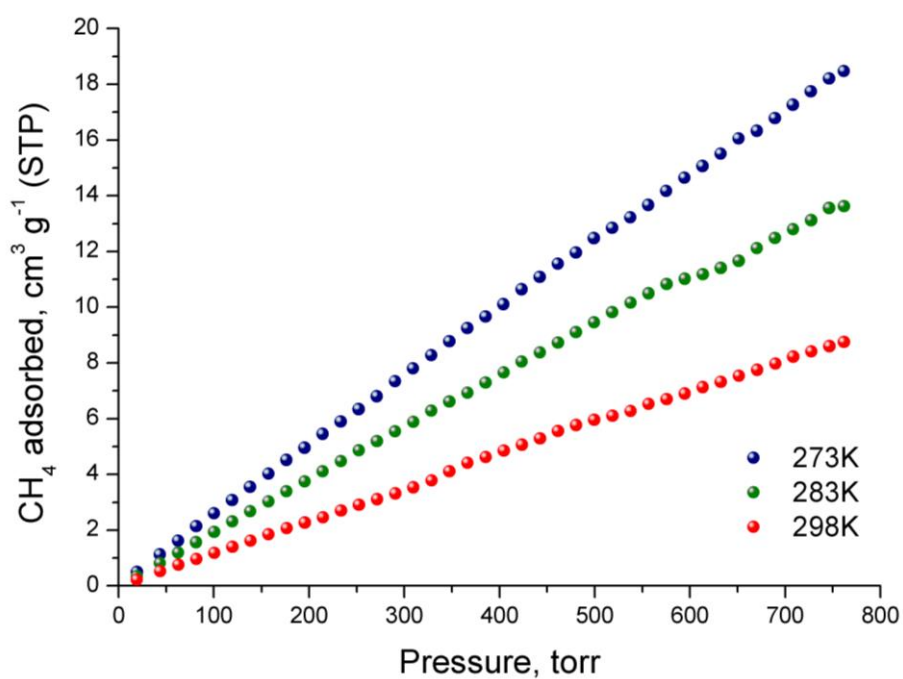

**Figure S53.** CH<sub>4</sub> adsorption isotherms of Hf-**flu**-SO<sub>2</sub> at 273 K, 283 K and 298 K.

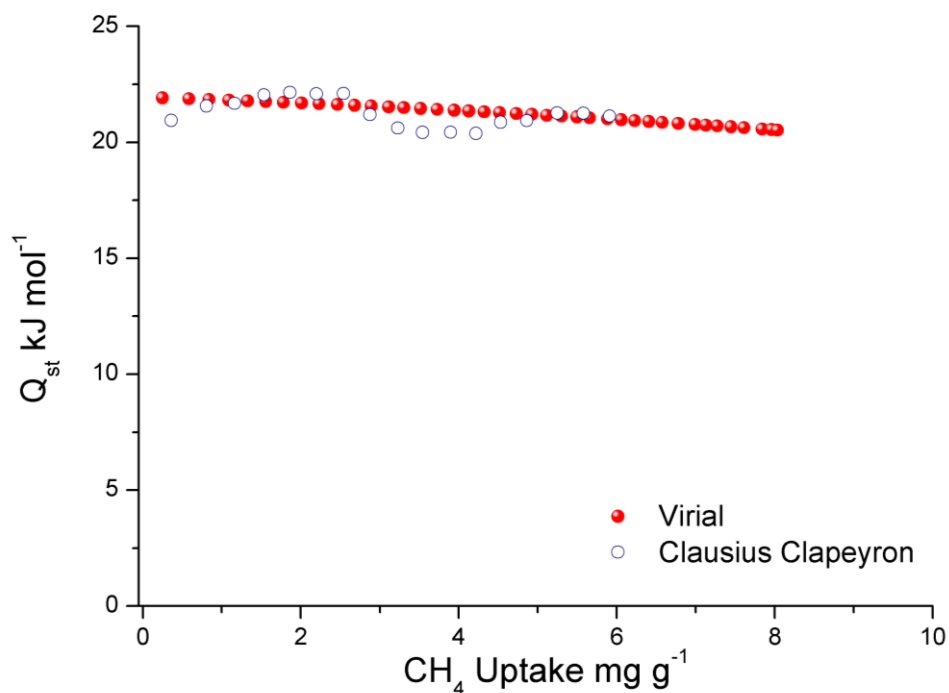

**Figure S54.** CH<sub>4</sub> isosteric heat of adsorption of Hf-**flu**-SO<sub>2</sub> as a function of surface coverage.

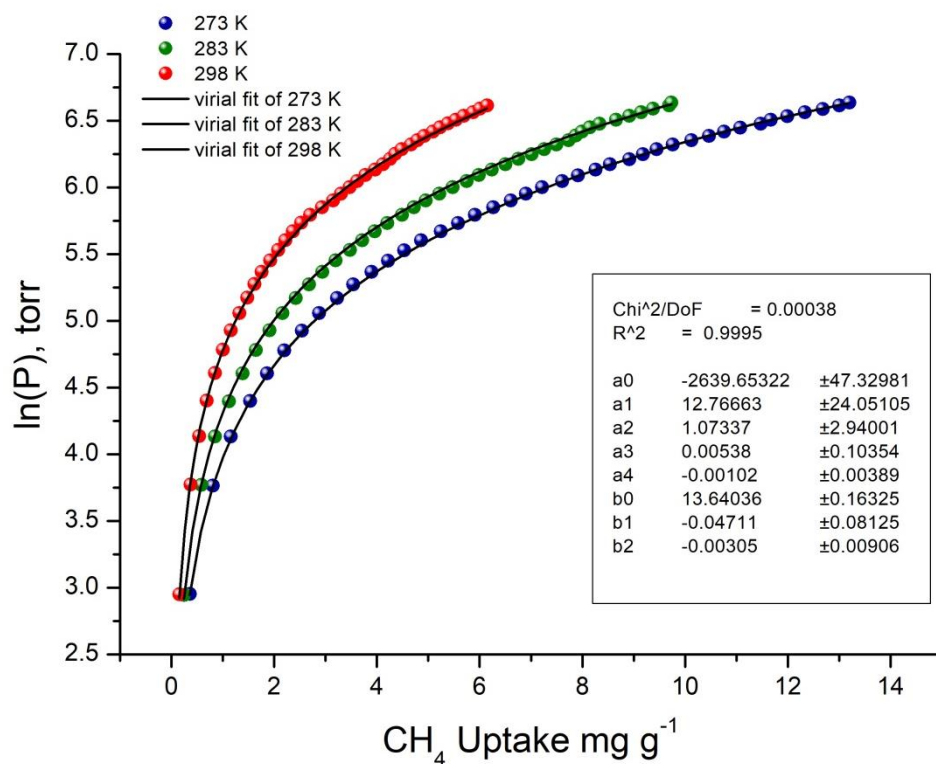

**Figure S55.** Virial type fitting of CH<sub>4</sub> adsorption isotherms of Hf-**flu**-SO<sub>2</sub> at 273 K, 283 K and 298 K according to equation 1.

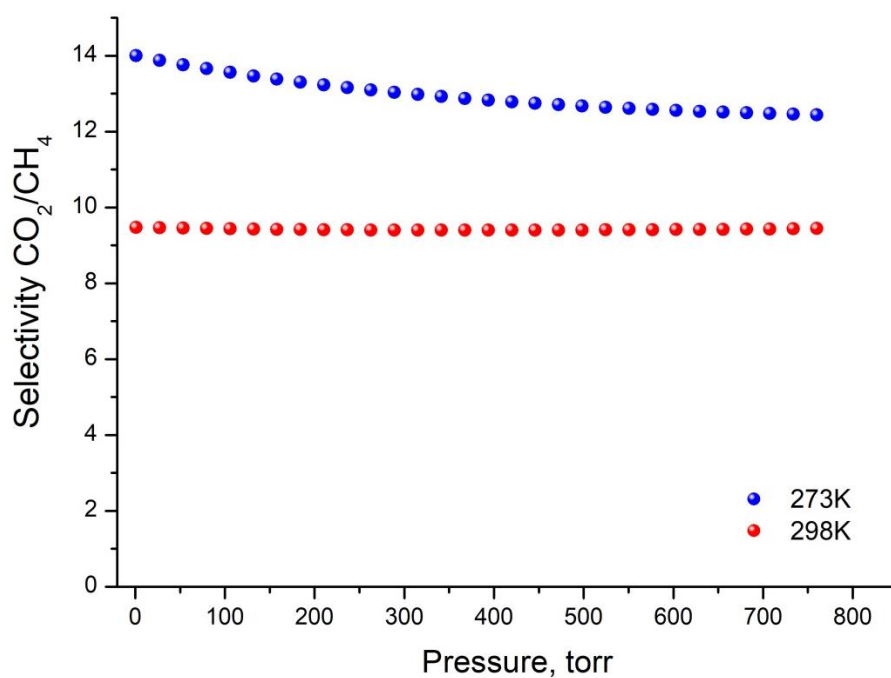

**Figure S56.** IAST selectivity of CO<sub>2</sub> over CH<sub>4</sub> at 273 K and 298 K for a 5/95 mixture of the Zr-flu-SO<sub>2</sub>.

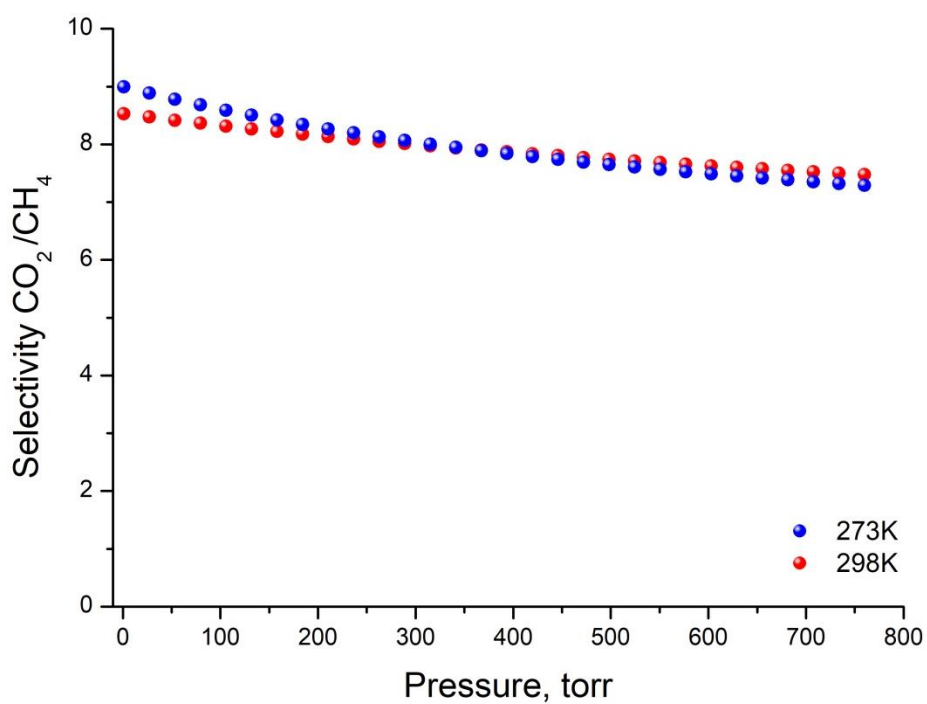

**Figure S57.** IAST selectivity of CO<sub>2</sub> over CH<sub>4</sub> at 273 K and 298 K for a 5/95 mixture of the Hf-flu-SO<sub>2</sub>.

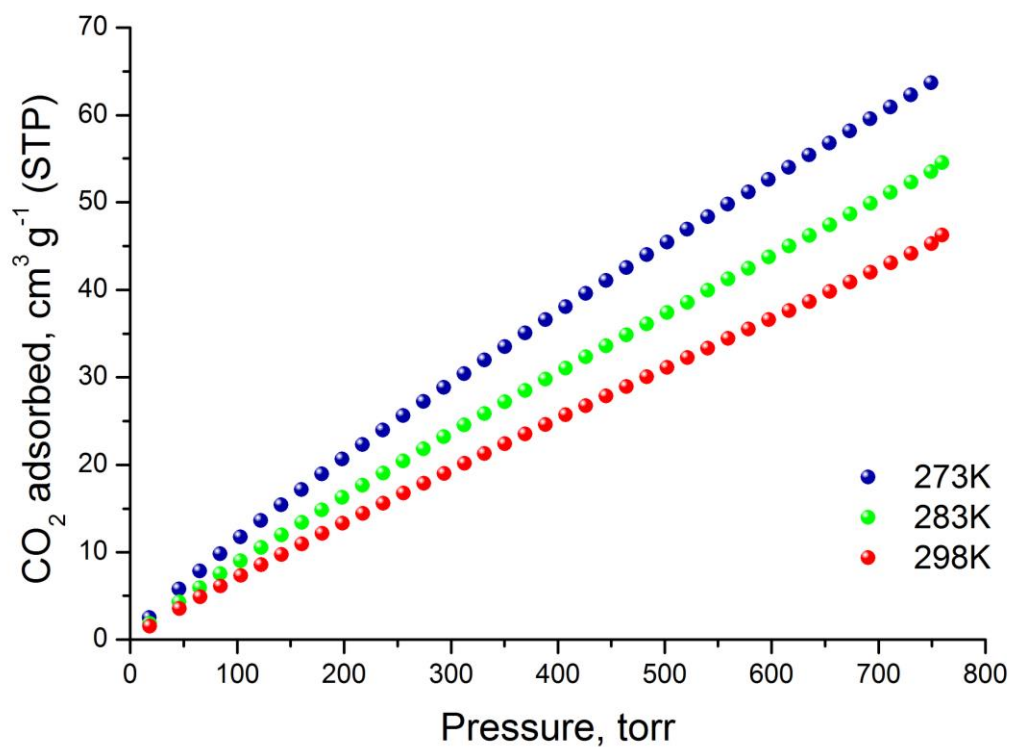

**Figure S58.** CO<sub>2</sub> adsorption isotherms of PCN-521 at 273 K, 283 K and 298 K.

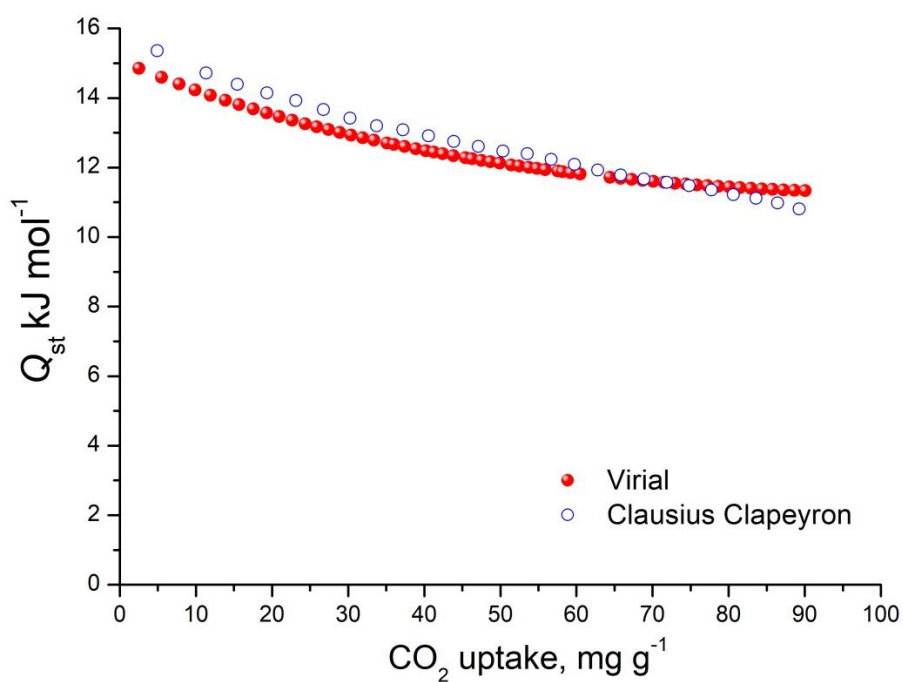

**Figure S59.** CO<sub>2</sub> isosteric heat of adsorption of PCN-521 as a function of surface coverage.

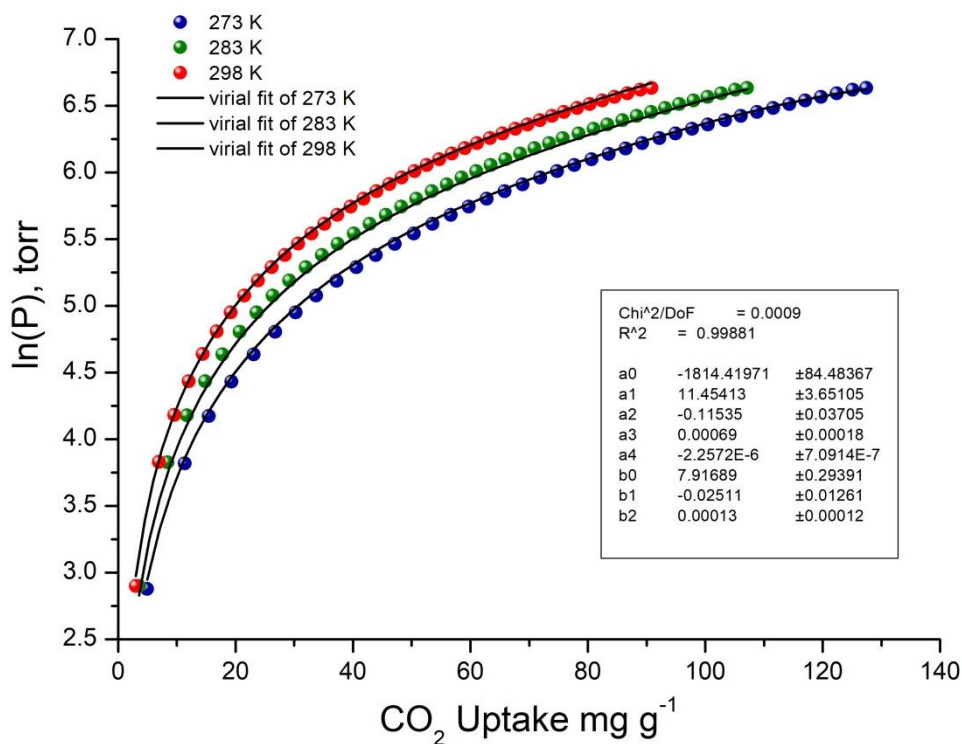

**Figure S60.** Virial type fitting of CO<sub>2</sub> adsorption isotherms of PCN-521 at 273 K, 283 K and 298 K according to equation 1.

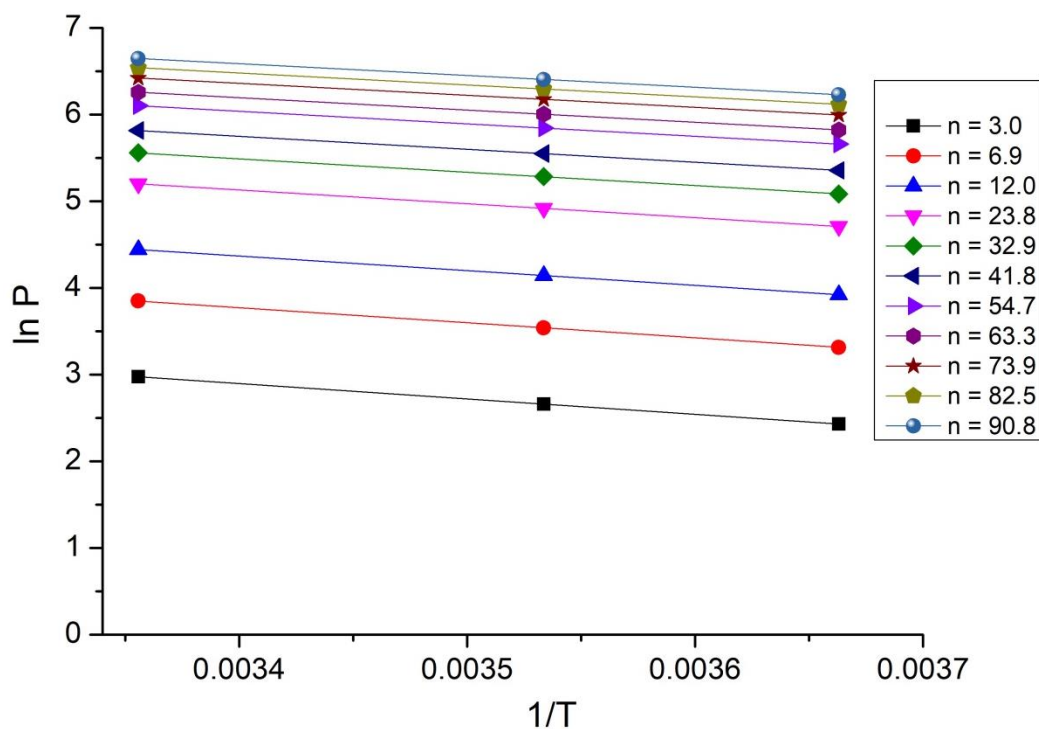

**Figure S61.** Isosteric lnP against 1/T plot for 273 K, 283 K and 298 K at different loadings  $n$  (in mg g<sup>-1</sup>) of CO<sub>2</sub> in PCN-521, confirming the accuracy of the  $Q_{st}$  determined from the virial type analysis, as evidenced by the linearity in the isosters.

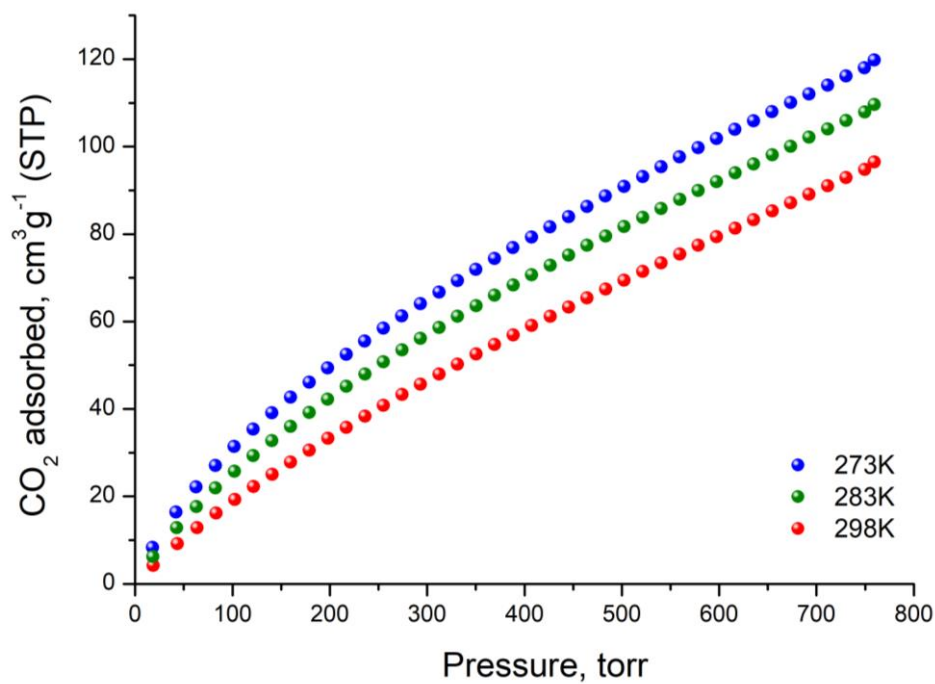

**Figure S62.** CO<sub>2</sub> adsorption isotherms of Y-hpt-MOF-1 at 273 K, 283 K and 298 K.

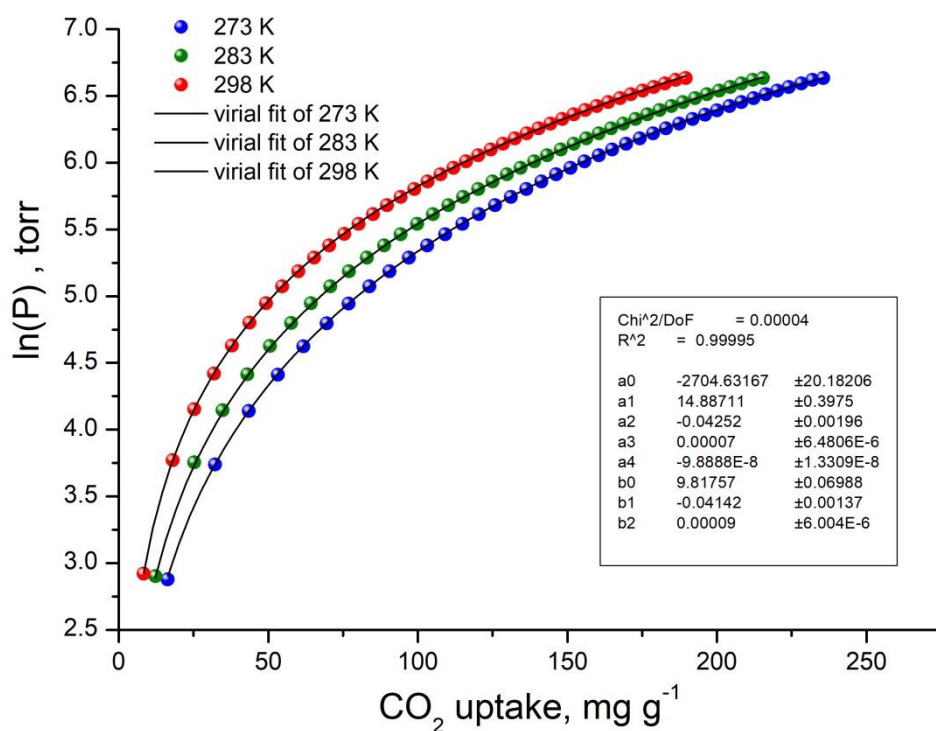

**Figure S63.** Virial type fitting of CO<sub>2</sub> adsorption isotherms of Y-hpt-MOF-1 at 273 K, 283 K and 298 K according to equation 1.

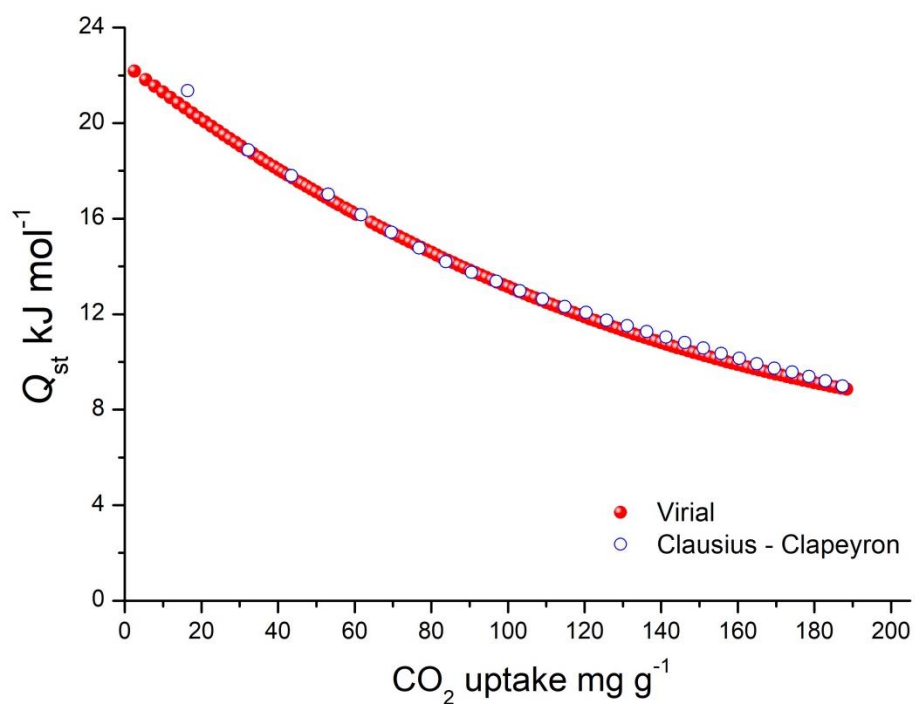

**Figure S64.**  $\text{CO}_2$  isosteric heat of adsorption of Y-hpt-MOF-1 as a function of surface coverage.

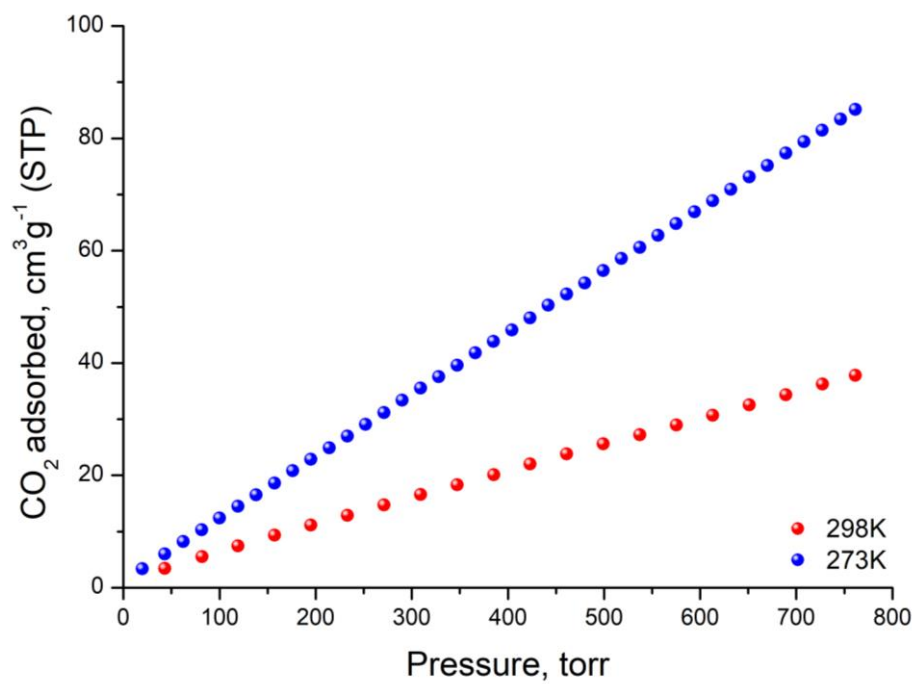

**Figure S65.**  $\text{CO}_2$  adsorption isotherms of Y-ken-MOF-1 at 273 K and 298 K.



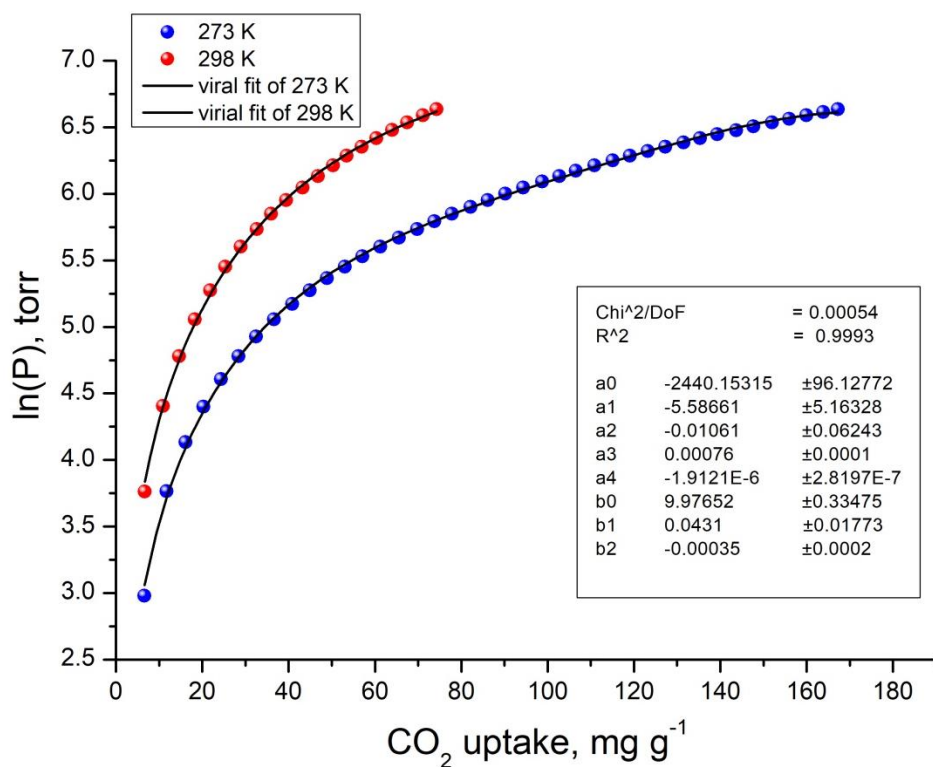

**Figure S66.** Virial type fitting of CO<sub>2</sub> adsorption isotherms of Y-ken-MOF-1 at 273 K and 298 K according to equation 1.

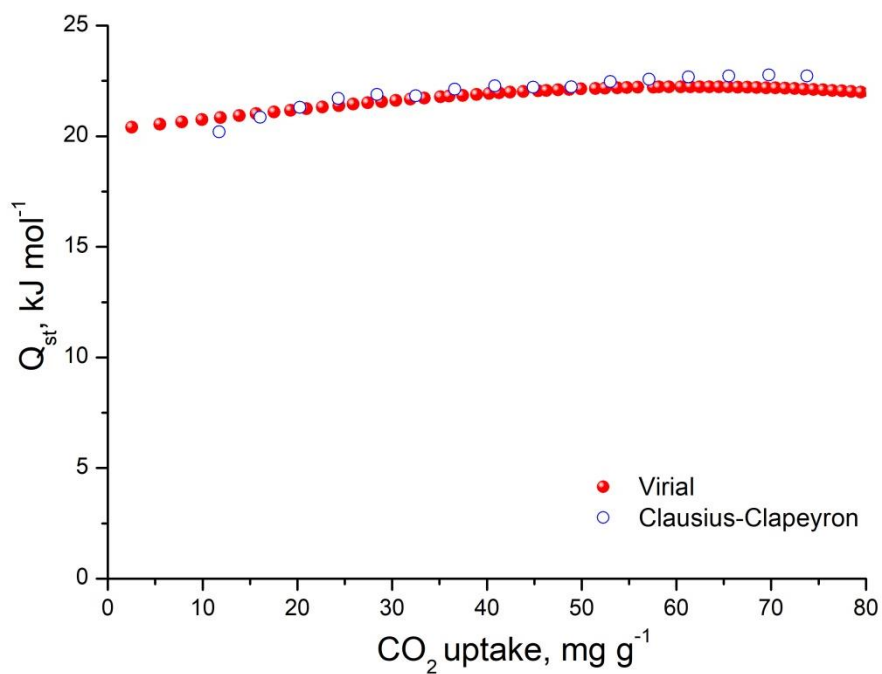

**Figure S67.** CO<sub>2</sub> isosteric heat of adsorption of Y-ken-MOF-1 as a function of surface coverage.

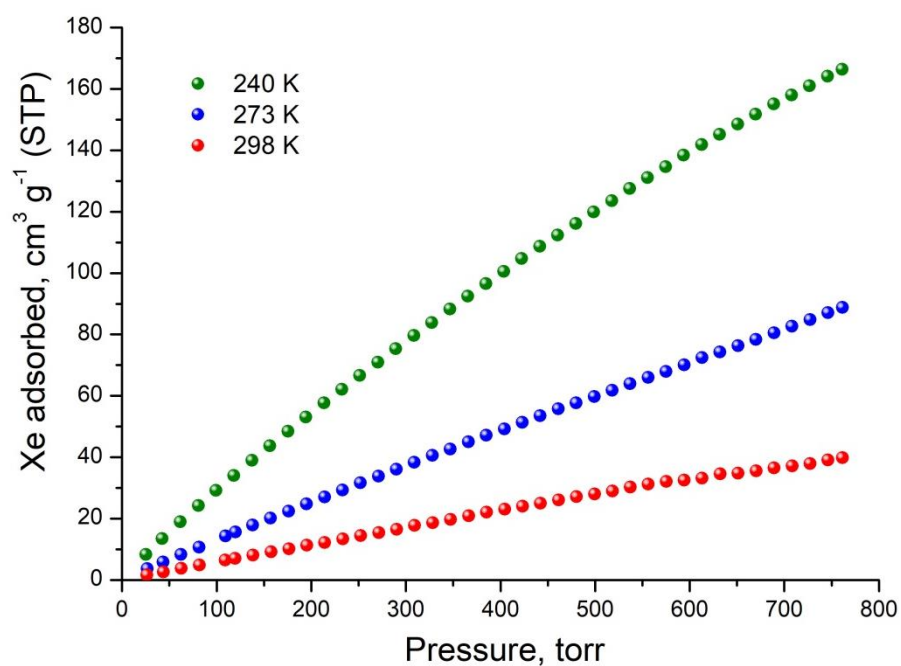

**Figure S68.** Xe adsorption isotherms of Y-ken-MOF-1 at 240 K, 273 K and 298 K up to 1 bar.

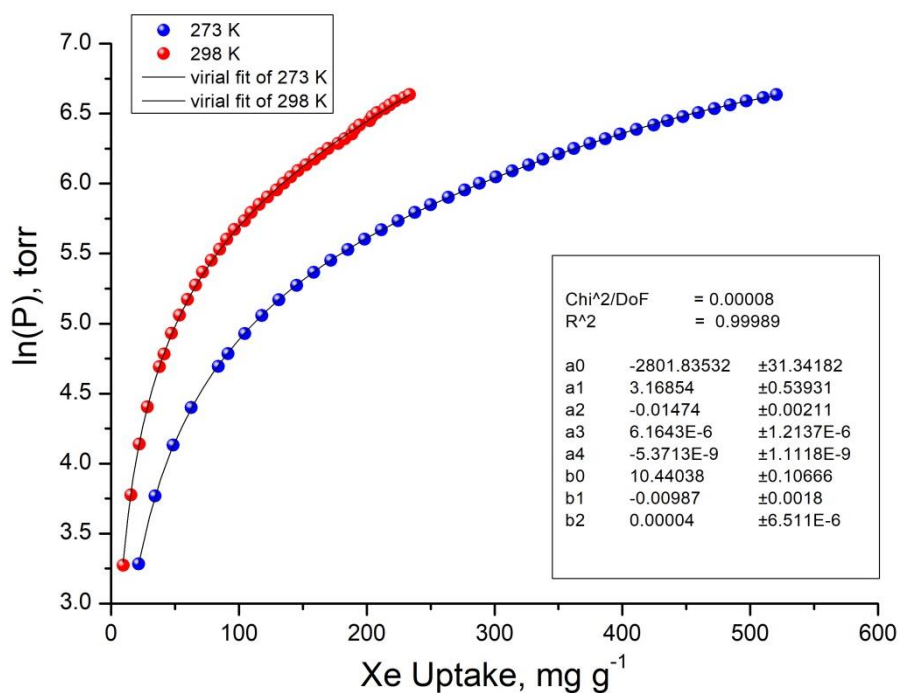

**Figure S69.** Virial type fitting of Xe adsorption isotherms of Y-ken-MOF-1 at 273 K and 298K according to equation 1.

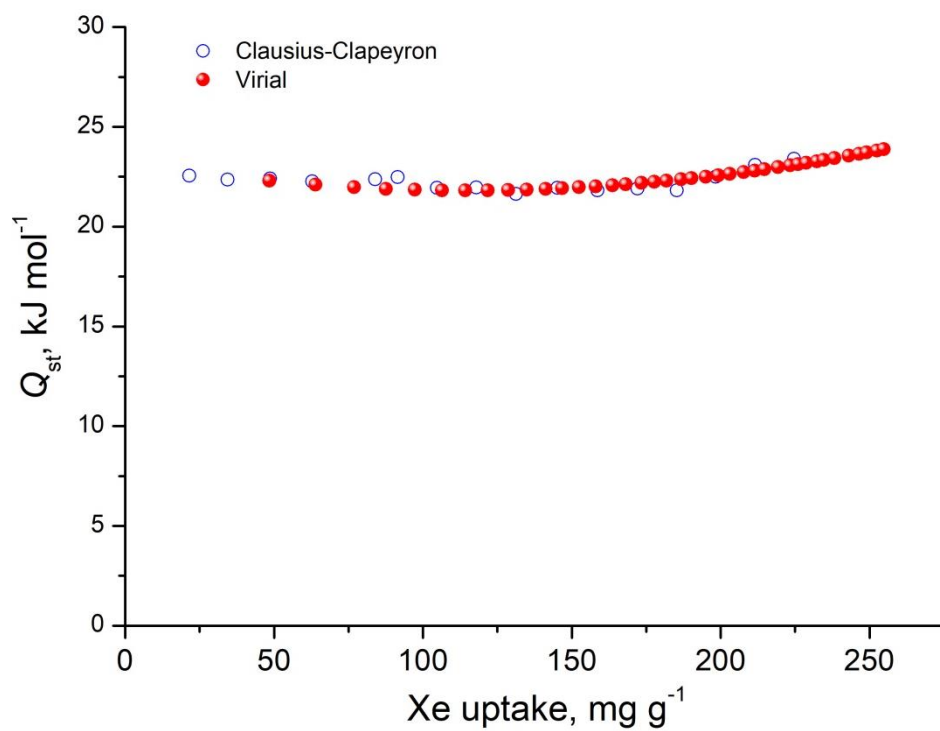

**Figure S70.** Xe isosteric heat of adsorption of Y-**ken**-MOF-1 as a function of surface coverage.

## NMR measurements of acid digested samples

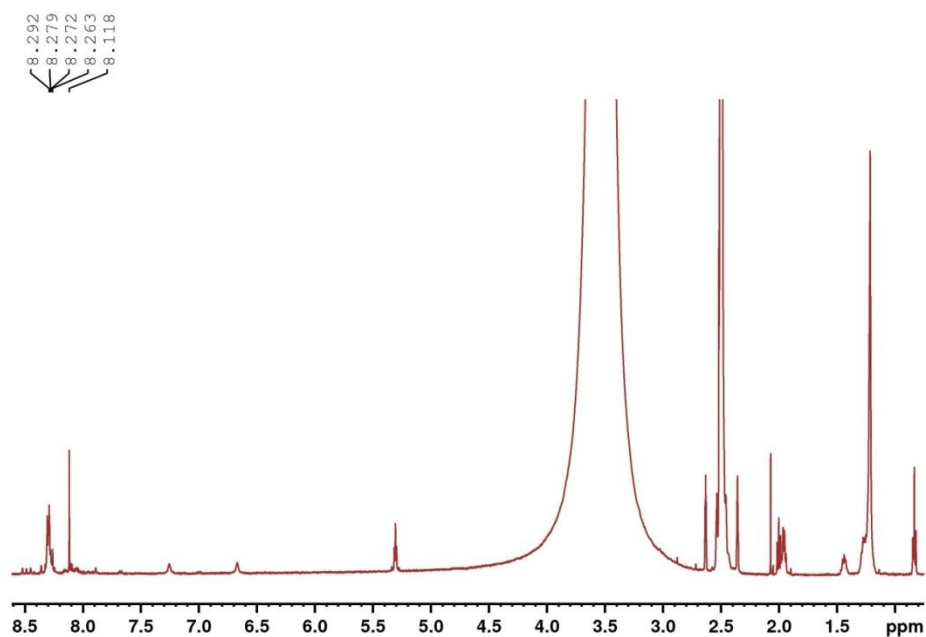

**Figure S71.**  $^1\text{H}$  NMR spectrum of evacuated Zr-**flu**-SO<sub>2</sub> after digesting the sample in HF/DMSO-d<sub>6</sub> solution.

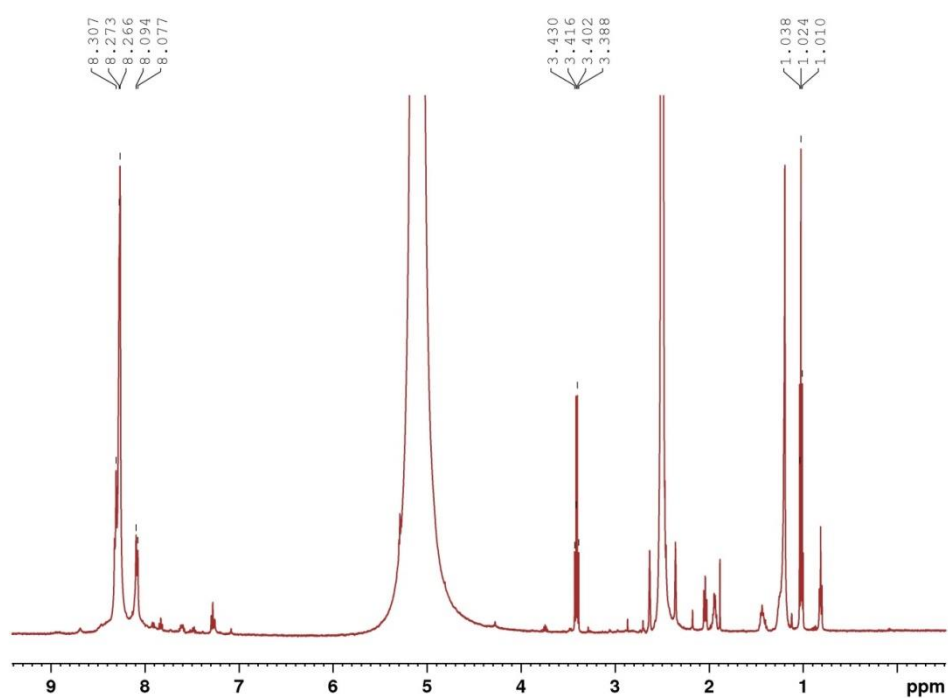

**Figure S72.**  $^1\text{H}$  NMR spectrum of evacuated Y-**hpt**-MOF-1 after digesting the sample in HCl/DMSO-d<sub>6</sub> solution.

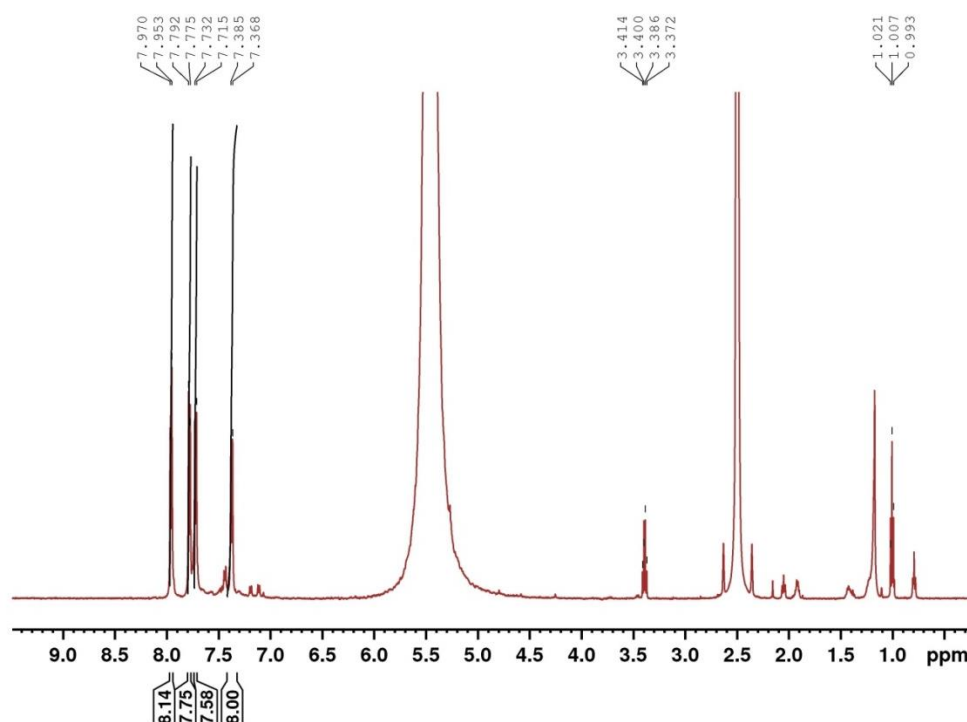

**Figure S73.**  $^1\text{H}$  NMR spectrum of evacuated Y-ken-MOF-1 after digesting the sample in HCl/DMSO- $\text{d}_6$  solution.

### Thermal gravimetric analyses (TGA)

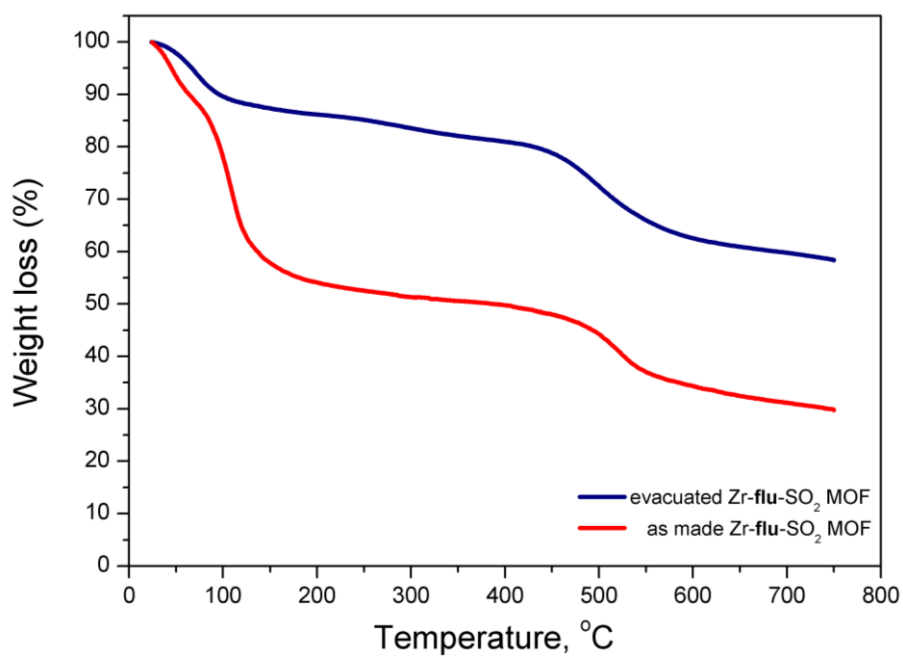

**Figure S74.** TGA curve for the as-made (red) Zr-flu-SO<sub>2</sub> and the corresponding evacuated (blue) solid, recorded under nitrogen flow with a heating rate 5 deg/min.

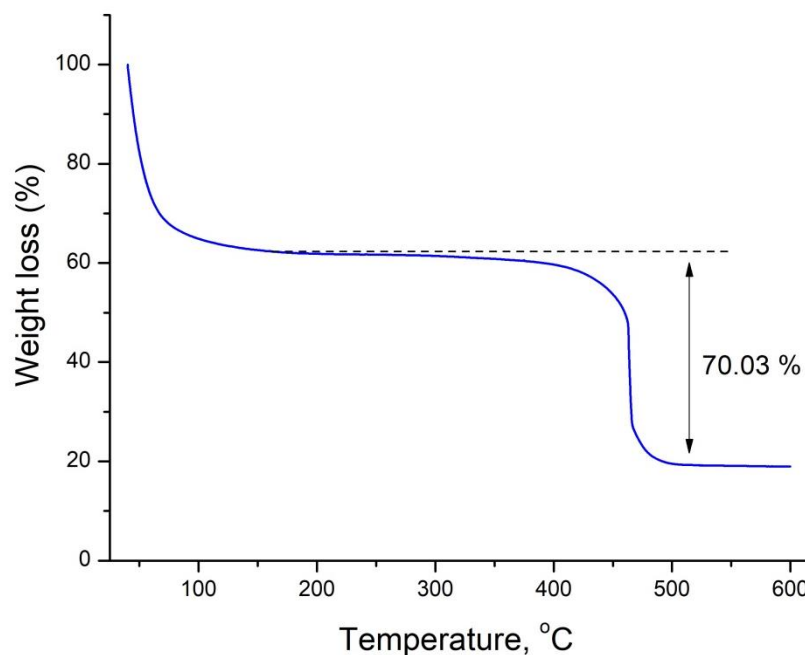

**Figure S75.** TGA curve of an ethanol exchanged Y-ken-MOF-1 recorded under air flow with a heating rate 5 deg/min. The observed weight loss between 130 °C (plateau after the removal of excess ethanol) and 600 °C is 70.03 % which is higher compared to the expected weight loss of 64.50 % based on the chemical formula  $Y_9(\mu_3-O)_2(\mu_3-OH)_{12}(OH)_2(H_2O)_{11}L_2$  and considering the formation of  $Y_2O_3$  at 600 °C under air. The observed 5.5 % increase in weight loss could be associated with the presence of an amount of trapped unreacted ligand inside the pore space of Y-ken-MOF-1. This increase corresponds to **2.65** ligands per formula unit instead of **2**. The corresponding IR spectra shows a broad shoulder at  $1683\text{ cm}^{-1}$  which is associated with the stretching vibration of the C=O bond of the free ligand. (see below).

### Infrared Spectroscopy

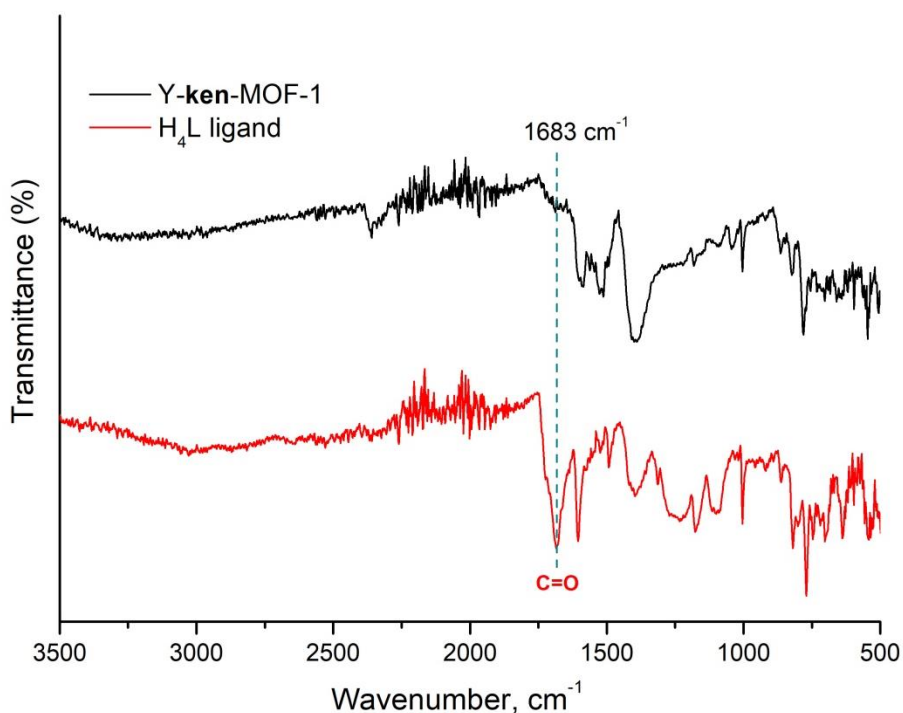

**Figure S76.** ATR-IR spectrum of ethanol exchanged Y-ken-MOF-1 and the free ligand  $H_4L$ .

## References

- (1) Ma, L. Q.; Jin, A.; Xie, Z. G.; Lin, W. B., Freeze Drying Significantly Increases Permanent Porosity and Hydrogen Uptake in 4,4-Connected Metal-Organic Frameworks. *Angew. Chem. Int. Ed.* **2009**, *48* (52), 9905-9908.
- (2) Zhang, M. W.; Chen, Y. P.; Bosch, M.; Gentle, T.; Wang, K. C.; Feng, D. W.; Wang, Z. Y. U.; Zhou, H. C., Symmetry-Guided Synthesis of Highly Porous Metal-Organic Frameworks with Fluorite Topology. *Angew. Chem. Int. Ed.* **2014**, *53* (3), 815-818.
- (3) Hu, F.; Di, Z.; Wu, M.; Hong, M.; Li, J., A Robust Multifunctional Eu<sub>6</sub>-Cluster Based Framework for Gas Separation and Recognition of Small Molecules and Heavy Metal Ions. *Cryst. Growth Des.* **2019**, *19* (11), 6381-6387.
- (4) Guillerm, V.; Kim, D.; Eubank, J. F.; Luebke, R.; Liu, X.; Adil, K.; Lah, M. S.; Eddaoudi, M., A supermolecular building approach for the design and construction of metal-organic frameworks. *Chem. Soc. Rev.* **2014**, *43* (16), 6141-6172.
- (5) Wei, N.; Zhang, Y.; Liu, L.; Han, Z. B.; Yuan, D. Q., Pentanuclear Yb(III) cluster-based metal-organic frameworks as heterogeneous catalysts for CO<sub>2</sub> conversion. *Appl. Catal. B-Environ.* **2017**, *219*, 603-610.
- (6) He, Y.; Furukawa, H.; Wu, C.; O'Keeffe, M.; Chen, B., A mesoporous lanthanide-organic framework constructed from a dendritic hexacarboxylate with cages of 2.4 nm. *CrystEngComm* **2013**, *15* (45), 9328-9331.
- (7) Sumida, K.; Rogow, D. L.; Mason, J. A.; McDonald, T. M.; Bloch, E. D.; Herm, Z. R.; Bae, T. H.; Long, J. R., Carbon Dioxide Capture in Metal-Organic Frameworks. *Chem. Rev.* **2012**, *112* (2), 724-781.
- (8) Czepirski, L.; Jagiello, J., VIRIAL-TYPE THERMAL EQUATION OF GAS SOLID ADSORPTION. *Chem. Eng. Sci.* **1989**, *44* (4), 797-801.
- (9) Myers, A. L.; Prausnitz, J. M., Thermodynamics of mixed-gas adsorption. *AIChE Journal* **1965**, *11* (1), 121-127.
- (10) Bae, Y.-S.; Mulfort, K. L.; Frost, H.; Ryan, P.; Punnnathanam, S.; Broadbelt, L. J.; Hupp, J. T.; Snurr, R. Q., Separation of CO<sub>2</sub> from CH<sub>4</sub> Using Mixed-Ligand Metal-Organic Frameworks. *Langmuir* **2008**, *24* (16), 8592-8598.
- (11) Armatas, G. S.; Kanatzidis, M. G., Mesoporous germanium-rich chalcogenido frameworks with highly polarizable surfaces and relevance to gas separation. *Nat. Mater.* **2009**, *8* (3), 217-222.
